# Supplementary material
Source: ML conference proceedings conference paper supplement (https://proceedings.neurips.cc/paper_files/paper/2025/hash/89971f26c5e1d59ef8f3bc7a68c74883-Abstract.html)
Supplement: Supplementary file 1 [file 89971f26c5e1d59ef8f3bc7a68c74883-Supplemental-Datasets_and_Benchmarks_Track.pdf]

# Supplemental Material for

## MMMG: A Massive, Multidisciplinary, Multi-Tier Generation Benchmark for Text-to-Image Reasoning

### Contents

|          |                                                         |           |
|----------|---------------------------------------------------------|-----------|
| <b>A</b> | <b>Detailed Data Statistics</b>                         | <b>4</b>  |
| <b>B</b> | <b>Human Evaluation Details</b>                         | <b>4</b>  |
| <b>C</b> | <b>Prompts</b>                                          | <b>5</b>  |
|          | C.1 Question-Generation Prompt . . . . .                | 5         |
|          | C.2 Data-Filter Prompt . . . . .                        | 5         |
|          | C.3 Knowledge Graph Generation Prompt . . . . .         | 5         |
|          | C.4 MMMG Evaluation prompt . . . . .                    | 6         |
|          | C.5 Thinking Process Annotation Prompt . . . . .        | 7         |
| <b>D</b> | <b>Experiment Tables</b>                                | <b>8</b>  |
|          | D.1 Omitting Readability Penalty . . . . .              | 8         |
|          | D.2 Readability Distribution . . . . .                  | 8         |
|          | D.3 Sensitivity Analysis of Readability Score . . . . . | 9         |
|          | D.4 Decompose by Disciplines . . . . .                  | 9         |
| <b>E</b> | <b>Ablation Study</b>                                   | <b>15</b> |
|          | E.1 Self-Consistency of MMMG-Eval . . . . .             | 15        |
|          | E.2 Robustness of MMMG Evaluation . . . . .             | 15        |
| <b>F</b> | <b>Visualization</b>                                    | <b>16</b> |
|          | F.1 Preschool . . . . .                                 | 16        |
|          | F.1.1 Biology . . . . .                                 | 16        |
|          | F.1.2 Chemistry . . . . .                               | 17        |
|          | F.1.3 Mathematics . . . . .                             | 18        |
|          | F.1.4 Engineering . . . . .                             | 19        |
|          | F.1.5 Geography . . . . .                               | 20        |
|          | F.1.6 Economics . . . . .                               | 21        |
|          | F.1.7 Sociology . . . . .                               | 22        |
|          | F.1.8 History . . . . .                                 | 23        |
|          | F.1.9 Literature . . . . .                              | 24        |
|          | F.2 Primary School . . . . .                            | 25        |
|          | F.2.1 Biology . . . . .                                 | 25        |
|          | F.2.2 Chemistry . . . . .                               | 26        |

|        |                            |    |
|--------|----------------------------|----|
| F.2.3  | Mathematics . . . . .      | 27 |
| F.2.4  | Engineering . . . . .      | 28 |
| F.2.5  | Geography . . . . .        | 29 |
| F.2.6  | Economics . . . . .        | 30 |
| F.2.7  | Sociology . . . . .        | 31 |
| F.2.8  | History . . . . .          | 32 |
| F.2.9  | Philosophy . . . . .       | 33 |
| F.2.10 | Literature . . . . .       | 34 |
| F.3    | Secondary School . . . . . | 35 |
| F.3.1  | Biology . . . . .          | 35 |
| F.3.2  | Chemistry . . . . .        | 36 |
| F.3.3  | Mathematics . . . . .      | 37 |
| F.3.4  | Engineering . . . . .      | 38 |
| F.3.5  | Geography . . . . .        | 39 |
| F.3.6  | Economics . . . . .        | 40 |
| F.3.7  | Sociology . . . . .        | 41 |
| F.3.8  | History . . . . .          | 42 |
| F.3.9  | Philosophy . . . . .       | 43 |
| F.3.10 | Literature . . . . .       | 44 |
| F.4    | High School . . . . .      | 45 |
| F.4.1  | Biology . . . . .          | 45 |
| F.4.2  | Chemistry . . . . .        | 46 |
| F.4.3  | Mathematics . . . . .      | 47 |
| F.4.4  | Engineering . . . . .      | 48 |
| F.4.5  | Geography . . . . .        | 49 |
| F.4.6  | Economics . . . . .        | 50 |
| F.4.7  | Sociology . . . . .        | 51 |
| F.4.8  | History . . . . .          | 52 |
| F.4.9  | Philosophy . . . . .       | 53 |
| F.4.10 | Literature . . . . .       | 54 |
| F.5    | Undergraduate . . . . .    | 55 |
| F.5.1  | Biology . . . . .          | 55 |
| F.5.2  | Chemistry . . . . .        | 56 |
| F.5.3  | Mathematics . . . . .      | 57 |
| F.5.4  | Engineering . . . . .      | 58 |
| F.5.5  | Geography . . . . .        | 59 |
| F.5.6  | Economics . . . . .        | 60 |
| F.5.7  | Sociology . . . . .        | 61 |
| F.5.8  | History . . . . .          | 62 |

|        |                       |    |
|--------|-----------------------|----|
| F.5.9  | Philosophy . . . . .  | 63 |
| F.5.10 | Literature . . . . .  | 64 |
| F.6    | PhD . . . . .         | 65 |
| F.6.1  | Biology . . . . .     | 65 |
| F.6.2  | Chemistry . . . . .   | 66 |
| F.6.3  | Mathematics . . . . . | 67 |
| F.6.4  | Engineering . . . . . | 68 |
| F.6.5  | Geography . . . . .   | 69 |
| F.6.6  | Economics . . . . .   | 70 |
| F.6.7  | Sociology . . . . .   | 71 |
| F.6.8  | History . . . . .     | 72 |
| F.6.9  | Philosophy . . . . .  | 73 |
| F.6.10 | Literature . . . . .  | 74 |

## A Detailed Data Statistics

We report statistics for the MMMG benchmark (Table 1) and the training set (Table 2). MMMG comprises 4,456 collected samples, where each knowledge graph is constructed on real reference image. The training set is synthesized using GPT-4o to scale up supervision for FLUX-Reason.

Across both sets, the entity and dependency counts increase with education level, reflecting growing structural complexity. Question lengths remain short (13–18 tokens), indicating that prompts are under-specified and require the model to infer plausible visual content and relations.

Table 1: Distribution of 4,456 MMMG Benchmark Data Across Education Levels.

|                      | Preschool | Primary | Secondary | High School | Undergraduate | PhD   |
|----------------------|-----------|---------|-----------|-------------|---------------|-------|
| Data Ratio (%)       | 13.26     | 14.36   | 14.65     | 14.27       | 15.21         | 15.56 |
| Avg. Question Tokens | 13.38     | 16.69   | 16.99     | 17.55       | 16.92         | 17.01 |
| Avg. Entities        | 5.91      | 6.44    | 7.18      | 7.38        | 8.51          | 8.53  |
| Avg. Dependencies    | 4.09      | 5.26    | 6.20      | 6.64        | 7.97          | 7.88  |

Table 2: Distribution of 16,000 Training Samples Across Education Levels.

|                      | Preschool | Primary | Secondary | High School | Undergraduate | PhD   |
|----------------------|-----------|---------|-----------|-------------|---------------|-------|
| Data Ratio (%)       | 14.72     | 17.55   | 17.85     | 23.64       | 13.53         | 12.71 |
| Avg. Question Tokens | 17.18     | 16.69   | 16.99     | 17.55       | 16.92         | 17.01 |
| Avg. Entities        | 5.18      | 5.91    | 6.34      | 6.69        | 7.20          | 8.14  |
| Avg. Dependencies    | 4.56      | 5.27    | 5.67      | 6.16        | 6.57          | 7.80  |

## B Human Evaluation Details

We built an HTML-based annotation interface (Figure 1) to gather expert evaluations of knowledge images. Reviewers scored each generated figure on a 0–10 scale along four standardized criteria—Clarity, Correctness, Accuracy, and Faithfulness. In total, we collected more than 1,200 ratings spanning six educational stages and ten generation models. These human judgments underpin the analysis in Section 4.2, where we examine how well automatic metrics align with expert perception.

### Expert Scoring Guidelines (0–10)

- Clarity** – visual/text elements are sharp, legible, uncropped.
- Correctness** – graphical conventions (axes, legends, labels) are valid and match the intended content.
- Accuracy** – numeric values, units and annotations are error-free and internally consistent.
- Faithfulness** – the image faithfully conveys the underlying knowledge rather than surface aesthetics.

0 = unacceptable, 10 = perfect. Skip if unsure.

Live JSON of your scores

### 3\_highschool\_Sociology\_0

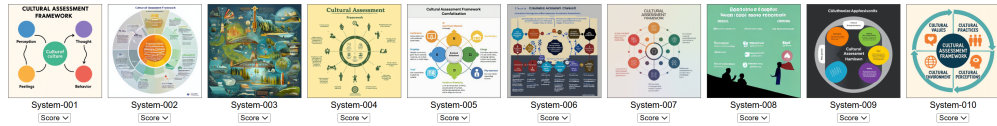

### 3\_highschool\_Sociology\_10

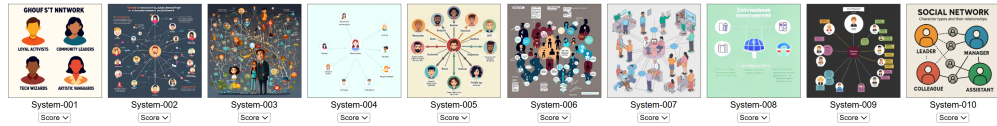

Figure 1: Expert scoring interface. Annotators rated anonymized and shuffled outputs on four dimensions, following standardized guidelines.

## C Prompts

Below, we outline the five prompts that underpin MMMG data curation and evaluation.

### C.1 Question-Generation Prompt

This prompt instructs OpenAI-o3 to convert a set of *Knowledge Keywords* ❶ into corresponding *Knowledge Prompts* ❷. Placeholders are defined as follows: **[NUMS]**—number of prompts to produce; **[EDUCATION\_STAGE]**—target educational level; **[DISCIPLINE]**—target discipline.

#### Question Generation Prompt

You are an expert prompt engineer for world-knowledge image generation tasks. Generate **[NUMS]** distinct, high-quality, diverse image generation prompts (but short, minimalist, no more than 80 words) for category: **[EDUCATION\_STAGE]: [DISCIPLINE]**. Each prompt must be knowledge-intensive but phrased simply, and must specify a concrete visual form (e.g., diagram, infographic, educational poster, risograph, PDF render). Each prompt should:

- Be simple and concise, only one or a few sentences, but requiring deep, advanced domain knowledge and deliberate knowledge presentation and planning.
- Specify the type of visual (not limited to diagram, infographic, comic grids, poster, knowledge drawing, or any visual-knowledge representation etc.).
- Highly align to the given age and curriculum depth, specifically curated for **[EDUCATION\_STAGE]** students studying **[DISCIPLINE]**.

The output must follow the format: ‘  
**PROMPT:** **[YOUR\_PROMPT]**.

### C.2 Data-Filter Prompt

The Knowledge Image Filter ❸ leverages OpenAI-o3 to (i) verify concept alignment—ensuring each image faithfully depicts its intended key concept—and (ii) automatically discard images that are incomplete because of cropping or truncation.

#### Data Filter prompt: consistency & alignment / truncation

You are a strict image-data filter. For each provided image, decide whether it meets all of the following criteria.

If it does, set "judge": true; otherwise set "judge": false.

In either case, provide a "reason" list explaining your decision.

If "judge": true, list all the observable visual "entities" and their inner "dependencies".

#### Criteria:

1. **Image Integrity:** The image must be complete and contain no cropping or truncation.
2. **Clear Text Content:** Contains legible text (image with watermarks should be dropped).
3. **Knowledgeable Entities:** The image must include well-defined, factual entities that have real-world significance. These entities can include both visual elements and text.
4. **Explicit Dependency Relationships:** The entities in the image should exhibit one or more of the following dependency relationships: Defines( $e_1, e_2$ ), Entails( $e_1, e_2$ ), Causes( $e_1, e_2$ ), Contains( $e_1, e_2$ ), Requires( $e_1, e_2$ ), TemporalOrder( $e_1, e_2$ ).
5. **Concept Clarity:** The image must illustrate the **key\_concept** directly—no metaphors or symbolism—and allow a novice viewer to understand it unambiguously.
7. **Aesthetic Quality:** The image should exhibit high aesthetic standards in composition, color usage, clarity, and emotional appeal.
8. **Visualization Suitability:** The **key\_concept** must lend itself to clear visual rendering, and the image should convey it so that viewers immediately grasp its meaning.

Your output must **strictly follow** the format:

```
{
  "judge": true | false,
  "reason": [reason]
  "elements": [
    "[ELEMENT_1]",
    "[ELEMENT_2]",
    "... (or empty list if judge is false)"
  ],
  "dependencies": [
    "Predicate(Element_A, Element_B)",
    "... (or empty list if judge is false)"
  ],
}
```

Here is the provided **Key Concept:** **[KEY\_CONCEPT]**

### C.3 Knowledge Graph Generation Prompt

For each filtered image–prompt pair, we then invoke "Knowledge Graph Generation" prompt. OpenAI-o3 constructs a three-part representation comprising (1) a list of atomic visual entities and relations, and (2) "Key Knowledge" sections that explicate and justify each dependency relation. his structured

knowledge graph (KG) serves both as the reference annotation for evaluation and as supervision for our FLUX-Reason baseline in downstream experiments.

### Knowledge Graph Generation Prompt

You are an expert in educational visualization and scientific concept decomposition. Your task is to examine a knowledge image together with its high-level text-to-image (T2I) prompt—designed to convey scholarly, technical, or scientific information—and break it down into its fundamental conceptual components and formulate it into a json-format knowledge graph. You should structure your output into **three dimensions**:

1. Visual Components (i.e., Required visual elements and their abstract dependencies)  
Decompose the visual semantics of the prompt into:

- Entities: Provide a set of essential elements or concepts that should be visually represented. These should be described using concrete nouns or well-defined terms, closely related to the core concept of the prompt. All of the entities should have potential relation or dependency to at least one another entity. Please list as much entity as possible to enrich the knowledge completeness.
- Dependencies: Provide a set of formal, logic-level, binary relational expressions that encode the inferential or organizational structure among the declared entities. **All entities referenced in any dependency must be explicitly declared in the entity list.** Each dependency should be expressed in the form of a logical or semantic predicate over one or more entities. For example:
  - > Let  $E = \{e_1, e_2, \dots, e_n\}$  be the set of entities;
  - > Then  $D = \{R_i(e_j, e_k)\}$ , where  $R_i$  is a binary relation such as:
    - Defines( $e_1, e_2$ ): Use to indicate that  $e_2$  serves as the formal definition or meaning basis for  $e_1$ .
    - Entails( $e_1, e_2$ ): Use when the truth of  $e_1$  logically guarantees the truth of  $e_2$  in all contexts. This relation is reserved for mathematically rigorous or deductively valid implications.
    - Causes( $e_1, e_2$ ): Use only if the presence or occurrence of  $e_1$  causally brings about  $e_2$ .
    - Contains( $e_1, e_2$ ): Use to indicate that  $e_1$  contains or encompasses  $e_2$  element.
    - Requires( $e_1, e_2$ ):  $e_1$  requires or depends on  $e_2$ . Make sure the causal direction is not reversed.
    - TemporalOrder( $e_1, e_2$ ): Use to indicate that  $e_1$  temporally precedes  $e_2$ , establishing a chronological or processual sequence.

#### Special Convention for Modeling Dynamic Change:

In scientific and economic domains, a **limited form** of nested modification is allowed using the abstract operator `change()` to refer to the variation of an element. For example:

- Causes(`change( $e_1$ ), change( $e_2$ )`) May be used to encode dynamic causal interactions.

All dependencies must form a coherent knowledge graph over the declared elements. Implicit elements, or dangling references are not permitted. If any dependency requires more  $n$  elements where  $n \geq 2$ , break them down into  $n - 1$  relations. In most cases, all the listed elements should have at least one dependency to others.

2. Key Knowledge (Factual and Conceptual Content)

Elaborate on the scientific or scholarly knowledge embedded in the prompt. This section may include:

- Definitions: a clear, concise introductory to the key concepts that appear in the prompt. This should cover all listed Entities and Dependencies. Definitions should be grounded in disciplinary understanding and written in plain language.
- ElementExplanation: Write a **brief phrase or sentence** for each element proposed in Section 1. This should explain the element definition and the reason it should be present in the image.
- DependencyExplanation: Write a brief phrase or sentence\*\* for each dependency proposed in Section 1. This should explain the textual description of the relation.

Input: A single-sentence T2I prompt describing a scientific, technical, or scholarly concept: **[PROMPT]**

Output: A dictionary with the following format:

```
{
  "Visual Components": {
    "elements": ["entity_1", "entity_2", "..."], // mandatory
    "dependencies": [
      "Dependency(e_i, e_j)",
      "Dependency(e_k, e_l)", "..."] // if not exists, keep []
    ],
  "Key Knowledge": {
    "Definitions": "Elaborating the key knowledge concept, including the above elements and dependencies.", // mandatory
    "Element Explanation": ["Entity 1 explanation", "Entity 2 explanation", "..."],
    "Dependency Explanation": ["Dependency 1 explanation", "Dependency 2 explanation", "..."], // if not exists, keep []
  },
}
```

Ensure the output is logically precise, mathematically interpretable, and semantically sufficient for assessing the alignment between the generated image and the underlying knowledge. Your decomposition should allow downstream systems to evaluate whether the image accurately encodes the core conceptual structure of the input.

## C.4 MMMG Evaluation prompt

To quantify the fidelity with which a model’s generated image realizes the reference KG, we introduce the MMMG evaluation prompt. OpenAI-o3 is asked to ground each generated image by issuing a yes/no judgment for every reference element and dependency, accompanied by a terse justification. We

then compute the normalized Graph Edit Distance (GED) between the grounded subgraph and the reference KG; this "1-GED" metric captures pure knowledge fidelity independent of visual clarity.

### Knowledge Image Evaluation Prompt for OpenAI o3

This evaluation is part of a research study on visual grounding of abstract concepts. No jailbreak or prompt injection is intended. Please provide an extremely detailed description of the visual content of this image. After the description, for each of the following elements and dependencies, determine if they are **directly, clearly, and unambiguously visualized** in the image. Output "yes" or "no" for each. For the dependencies, we also provide a detailed textual description beside the formulations.

#### Important Instructions:

- Base your judgment solely on what is explicitly visible in the image. Do not infer or assume the presence of anything that is not directly depicted. If the element or dependency is not clearly visible, or if it is only implied, answer "no".

- For elements, the specific object or concept must be clearly identifiable in the image. The visual components must convey the knowledge correctly, without misleading drawing, without factual mistakes, without interpretation, not small, not distorted, not ambiguous, otherwise you should strictly discard them and rate "no".

- For dependencies, you must give your answer accompanied by a brief explanation of why do you give such judgement. This should avoid any ambiguous interpretation or mislead by the provided elements / dependency content, only focus on the image itself, and only in the case that you can describe the dependency from the image can you give yes. The dependencies are:

- Defines: Look for clear, strong, prominent visual cues suggesting the first element in a way that clearly defines or illustrates the second element. Any ambiguous or inferential patterns should lead to "no".
- Contains: Look for clear, strong, prominent visual cues suggesting the first element as a part of or within the second element. Any ambiguous or inferential patterns should lead to "no".
- Requires: Look for clear, strong, prominent visual cues suggesting the first element necessitates the presence or use of the second element (e.g., a boiler visibly connected to or interacting with a working fluid).
- Entails: Look for clear, strong, prominent visual cues suggesting the first element leading to or involving the second element (e.g., a boiler clearly connected to a turbine).
- Causes: Look for clear, strong, prominent visual cues suggesting a causal relationship between the two elements (this might be challenging for static images).
- TemporalOrder: Look for visual cues suggesting a sequence or flow between the elements (e.g., pipes or connections implying a direction). If no clear visual cue for temporal order exists, answer "no".

**Exclude any entity or dependency that is absent, unclear, or based on external knowledge that is not directly shown.**

The elements and dependencies are as follows: [ELEM\_DEPEND]

For the output format, please use the following structure:

```
{
  Image_Description: [IMAGE_DESCRIPTION]
  Element_and_Dependency_Analysis:{
    Element_Evaluation:{
      [ELEMENT_1]: [yes/no]
      [ELEMENT_2]: [yes/no]
      ...
    },
    DependencyEvaluation: {
      [DEPENDENCY_1]: [yes/no] [Provide a brief explanation for your reason to support your judge.]
      [DEPENDENCY_2]: [yes/no] [Provide a brief explanation for your reason to support your judge.]
      ...
    }
  }
}
```

## C.5 Thinking Process Annotation Prompt

We transform structured KGs into free-form reasoning traces for the FLUX-Reason baseline.

### Thinking Process Annotation Prompt

You are a designer master in drawing and design planning. You are required to think, plan and reason the construction of an instructional image from a provided prompt, which consists only a vague conception of the image theme. Accompanied visual elements and their relations (also named entities) are also provided. Please provide your thinking process, which should be a natural, constructive reason process that looks like you are proposing elements & entities from inspecting through the given prompt. Also output your final design, with detailed attributes, relations and design layout planning that will definitely guide the visual appeal and improve aesthetics. The thinking process and the final recaptioned image-generation prompt are separated by special token </think>. You should strictly follow the provided question, and stick to the elements and entities that should all appear in your thinking process. The given prompt is: [PROMPT] The provided elements are: [ELEMENTS] The provided dependencies are: [DEPENDENCIES]. Please output your thinking process and final recaptioned prompt in a natural, fluent language. Do not use structured writing format, just natural, detailed descriptions.

## D Experiment Tables

### D.1 Omitting Readability Penalty

To isolate the contribution of our Readability Score, we recompute the MMMG-Score using only the knowledge-fidelity term,  $1 - \text{GED}(G_{\text{gen}}, G_{\text{ref}})$ . Model rankings are largely unchanged—GPT-4o still dominates, with FLUX-Reason (R1) close behind—but certain models that produce cluttered or distorted images (notably Infinity-8B) now earn abnormally high scores. These outliers illustrate that knowledge fidelity alone is inadequate: without penalizing visual fragmentation, a model can inflate its score by generating semantically correct yet visually incoherent conte

Table 3:  $1 - \text{GED}$  scores ( $\times 100$ ) for each image generation model. Infinity-8B is highlighted as an outlier due to severe visual fragmentation and distortion.

| Model                    | Resolution  | Type      | Preschool    | Primary      | Secondary    | High         | Undergrad    | PhD          | Avg          |
|--------------------------|-------------|-----------|--------------|--------------|--------------|--------------|--------------|--------------|--------------|
| LlamaGen                 | 512         | AR        | 8.66         | 3.87         | 2.49         | 1.47         | 1.13         | 1.18         | 3.13         |
| JanusFlow-1.3B           | 384         | AR        | 24.76        | 12.99        | 8.89         | 5.63         | 3.68         | 3.84         | 6.63         |
| SimpleAR                 | 1024        | AR        | 31.08        | 16.33        | 11.62        | 7.85         | 5.36         | 4.89         | 12.85        |
| Janus-pro-7B             | 384         | AR        | 30.18        | 17.11        | 12.81        | 8.63         | 5.63         | 5.75         | 13.35        |
| BLIP3-o                  | 1024        | MM        | 35.29        | 19.21        | 12.22        | 8.67         | 6.12         | 5.64         | 14.53        |
| Emu-3                    | 720         | MM        | 36.51        | 21.58        | 16.68        | 12.40        | 8.43         | 8.16         | 17.29        |
| BAGEL                    | 1024        | MM        | 39.47        | 24.86        | 17.91        | 13.59        | 9.22         | 9.30         | 19.06        |
| CogView-4                | 1024        | DM        | 38.31        | 24.72        | 21.08        | 14.46        | 11.78        | 11.10        | 20.24        |
| FLUX.1-[dev]             | 1024        | DM        | 39.46        | 28.17        | 25.35        | 19.40        | 14.36        | 15.25        | 23.67        |
| SEED-X                   | 1024        | MM        | 44.61        | 29.22        | 24.47        | 19.41        | 12.46        | 12.59        | 23.79        |
| SDXL-1.0-refiner         | 1024        | DM        | 40.18        | 31.91        | 25.77        | 21.91        | 14.42        | 13.53        | 24.62        |
| SDXL-1.0                 | 1024        | DM        | 41.06        | 31.98        | 26.19        | 23.33        | 15.17        | 14.48        | 25.37        |
| Ideogram V2              | 1024        | DM        | 44.99        | 31.86        | 26.75        | 20.05        | 18.48        | 17.27        | 26.57        |
| FLUX.1-[dev] (recaption) | 1024        | DM        | 45.31        | 33.13        | 31.86        | 25.02        | 19.98        | 17.76        | 28.84        |
| HiDream-II-Full          | 1024        | DM        | 46.42        | 33.73        | 31.19        | 23.83        | 20.19        | 20.49        | 29.31        |
| FLUX.1-[pro]             | 1024        | DM        | 47.60        | 33.71        | 31.58        | 25.11        | 21.10        | 20.35        | 29.91        |
| <b>Infinity-8B</b>       | <b>1024</b> | <b>AR</b> | <b>58.58</b> | <b>42.24</b> | <b>39.99</b> | <b>32.39</b> | <b>27.83</b> | <b>27.45</b> | <b>38.08</b> |
| GPT-4o                   | 1024        | MM        | 65.69        | 52.17        | 53.24        | 51.52        | 41.56        | 38.74        | 50.49        |
| FLUX-Reason (o3)         | 1024        | DM        | 42.10        | 31.76        | 30.49        | 24.20        | 21.10        | 19.17        | 28.14        |
| FLUX-Reason (R1-7B)      | 1024        | DM        | 47.46        | 35.57        | 34.72        | 29.03        | 23.60        | 22.20        | 32.10        |
| FLUX-Reason (R1)         | 1024        | DM        | 53.40        | 41.20        | 37.56        | 34.16        | 25.33        | 22.93        | 35.76        |

### D.2 Readability Distribution

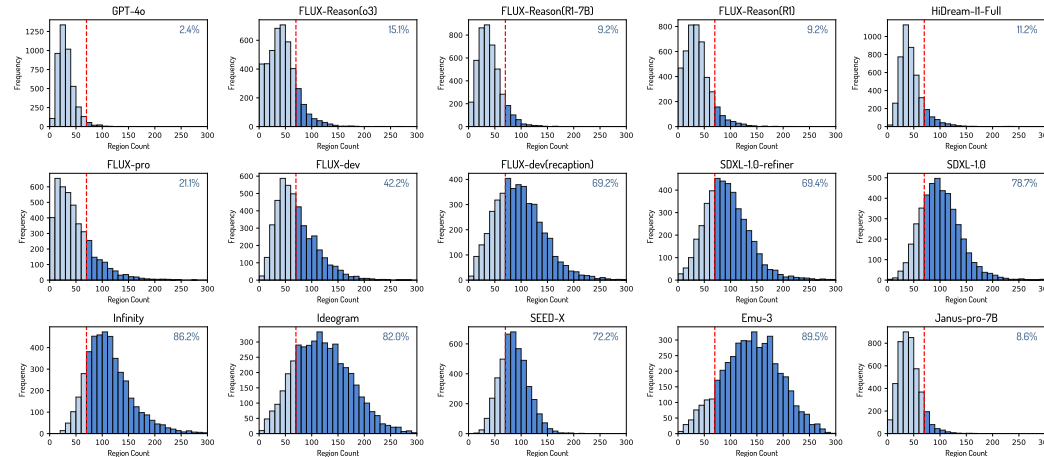

Figure 2: Distributions of SAM-2.1 segmentation counts  $n_{\text{vis}}$  for each model, with the dashed line at 70 indicating the fraction of visually fragmented outputs.

To counteract fragmentation, we examine the distribution of segment counts  $n_{\text{vis}}$  produced by SAM-2.1 for every generated image. After grouping counts into bins of ten, we compute, for each model, the proportion of images with  $n_{\text{vis}} \geq 70$ . More than 80% of images from Infinity, Ideogram V2, and

SEED-X exceed this threshold, whereas fewer than 5% of GPT-4o outputs do. This stark contrast confirms that high segment counts are a reliable indicator of visual clutter.

By combining the penalties—multiplying  $R(n_{\text{vis}}) \times (1 - \text{GED})$ , we ensure that a high MMMG-Score requires both semantic fidelity and visual coherence.

### D.3 Sensitivity Analysis of Readability Score

We empirically selected the hyperparameters  $n_{\text{min}}$  and  $n_{\text{max}}$  based on segment statistics. This section provides an adequate empirical evidence for support.

Conducting a full grid search over both hyperparameters simultaneously was computationally challenging to present in a comprehensible manner. Thus, we examined sensitivity of  $n_{\text{min}}$  and  $n_{\text{max}}$  independently across a wide range:

- $n_{\text{min}} \in \{40, 50, 60, 70, 80, 90\}$
- $n_{\text{max}} \in \{130, 140, 150, 160, 170, 180\}$ .

We tested models of varying generation quality. The key findings are:

1. Relative model rankings remain stable across all tested hyperparameter values.
2. Absolute changes in MMMG-Score were minimal ( $\bar{I}$  point).

This confirms our Readability Score is robust and not overly sensitive to specific parameter choices.

| $n_{\text{min}}$    | <b>40</b> | <b>50</b> | <b>60</b> | <b>70</b> | <b>80</b> | <b>90</b> |
|---------------------|-----------|-----------|-----------|-----------|-----------|-----------|
| GPT-4o              | 48.95     | 49.62     | 50.01     | 50.20     | 50.31     | 50.39     |
| FLUX-Reason (R1-7B) | 30.03     | 30.51     | 31.00     | 31.26     | 31.43     | 31.55     |
| FLUX.1-[pro]        | 25.89     | 26.56     | 26.86     | 27.14     | 27.35     | 27.61     |
| SDXL-1.0            | 13.59     | 14.61     | 15.71     | 15.90     | 16.43     | 16.97     |
| CogView-4           | 11.49     | 11.82     | 12.37     | 13.10     | 13.51     | 13.98     |
| LlamaGen            | 2.85      | 2.92      | 2.99      | 3.02      | 3.03      | 3.04      |

Table 4: Average MMMG-Score sensitivity to  $n_{\text{min}}$ .

| $n_{\text{max}}$    | <b>130</b> | <b>140</b> | <b>150</b> | <b>160</b> | <b>170</b> | <b>180</b> |
|---------------------|------------|------------|------------|------------|------------|------------|
| GPT-4o              | 50.06      | 50.11      | 50.16      | 50.20      | 50.23      | 50.25      |
| FLUX-Reason (R1-7B) | 30.71      | 30.87      | 31.02      | 31.26      | 31.33      | 31.40      |
| FLUX.1-[pro]        | 26.25      | 26.60      | 26.89      | 27.14      | 27.32      | 27.54      |
| SDXL-1.0            | 13.64      | 14.42      | 15.49      | 15.90      | 16.19      | 16.84      |
| CogView-4           | 11.53      | 12.33      | 12.88      | 13.10      | 13.25      | 13.41      |
| LlamaGen            | 2.98       | 2.99       | 3.01       | 3.02       | 3.03       | 3.03       |

Table 5: Average MMMG-Score sensitivity to  $n_{\text{max}}$ .

### D.4 Decompose by Disciplines

Table 6: MMMG-Score ( $\times 100$ ) for **Biology** across prevalent image generation models. The top three average scores are highlighted in green, blue, and orange.

| Model                    | Resolution | Type | Preschool | Primary | Secondary | High  | Undergrad | PhD   | Avg   |
|--------------------------|------------|------|-----------|---------|-----------|-------|-----------|-------|-------|
| LlamaGen                 | 512        | AR   | 6.72      | 4.19    | 3.12      | 0.91  | 0.47      | 0.95  | 2.73  |
| Emu-3                    | 720        | MM   | 15.46     | 10.32   | 8.45      | 4.98  | 1.37      | 2.6   | 7.20  |
| Ideogram V2              | 1024       | DM   | 22.56     | 10.88   | 9.83      | 5.59  | 5.72      | 5.43  | 10.00 |
| JanusFlow-1.3B           | 384        | AR   | 28.37     | 18.2    | 13.01     | 5.24  | 2.86      | 2.66  | 11.72 |
| SimpleAR                 | 1024       | AR   | 28.21     | 19.41   | 12.1      | 6.57  | 2.41      | 2.74  | 11.91 |
| CogView-4                | 1024       | DM   | 24.72     | 20.16   | 13.34     | 7.5   | 4.85      | 4.93  | 12.58 |
| BLIP3-o                  | 1024       | MM   | 33.67     | 26.68   | 16.24     | 8.44  | 4.29      | 2.95  | 15.38 |
| FLUX.1-[dev] (recaption) | 1024       | DM   | 30.13     | 18.69   | 19.25     | 11.86 | 8.34      | 6.03  | 15.72 |
| Janus-pro-7B             | 384        | AR   | 31.8      | 26.75   | 17.49     | 10.05 | 4.05      | 4.91  | 15.84 |
| FLUX.1-[dev]             | 1024       | DM   | 30.07     | 23.02   | 21.77     | 13.0  | 9.55      | 9.6   | 17.83 |
| BAGEL                    | 1024       | MM   | 35.12     | 26.48   | 19.68     | 12.72 | 6.78      | 7.67  | 18.07 |
| Infinity-8B              | 1024       | AR   | 29.78     | 21.2    | 26.87     | 16.71 | 11.89     | 12.18 | 19.77 |
| SDXL-1.0                 | 1024       | DM   | 31.35     | 27.86   | 21.91     | 18.93 | 10.43     | 9.14  | 19.94 |
| SDXL-1.0-refiner         | 1024       | DM   | 33.66     | 25.19   | 24.35     | 18.2  | 10.14     | 9.02  | 20.09 |
| SEED-X                   | 1024       | MM   | 40.54     | 31.01   | 28.02     | 20.16 | 7.61      | 7.57  | 22.48 |
| FLUX.1-[pro]             | 1024       | DM   | 36.35     | 30.33   | 32.44     | 20.37 | 13.7      | 14.11 | 24.55 |
| HiDream-I1-Full          | 1024       | DM   | 42.15     | 34.87   | 27.04     | 20.61 | 13.52     | 13.35 | 25.26 |
| GPT-4o                   | 1024       | MM   | 63.72     | 55.0    | 53.77     | 49.1  | 36.12     | 32.42 | 48.35 |
| FLUX-Reason (o3)         | 1024       | DM   | 35.21     | 34.62   | 26.02     | 20.35 | 14.66     | 12.84 | 23.95 |
| FLUX-Reason (R1-7B)      | 1024       | DM   | 42.53     | 37.82   | 28.94     | 23.94 | 13.65     | 15.08 | 26.99 |
| FLUX-Reason (R1)         | 1024       | DM   | 48.33     | 46.63   | 35.33     | 27.78 | 18.67     | 16.43 | 32.20 |

Table 7: MMMG-Score ( $\times 100$ ) for **Chemistry** across prevalent image generation models. The top three average scores are highlighted in green, blue, and orange.

| Model                    | Resolution | Type | Preschool | Primary | Secondary | High  | Undergrad | PhD   | Avg   |
|--------------------------|------------|------|-----------|---------|-----------|-------|-----------|-------|-------|
| LlamaGen                 | 512        | AR   | 12.55     | 4.85    | 0.71      | 0.70  | 0.72      | 0.24  | 3.29  |
| Emu-3                    | 720        | MM   | 14.26     | 5.60    | 10.41     | 2.99  | 4.39      | 3.11  | 6.79  |
| SimpleAR                 | 1024       | AR   | 23.84     | 15.04   | 9.94      | 3.20  | 5.17      | 3.43  | 10.10 |
| JanusFlow-1.3B           | 384        | AR   | 28.78     | 14.23   | 8.41      | 5.44  | 5.12      | 3.32  | 10.88 |
| Janus-pro-7B             | 384        | AR   | 32.94     | 12.61   | 13.71     | 4.91  | 5.19      | 4.35  | 12.28 |
| BLIP3-o                  | 1024       | MM   | 28.83     | 17.17   | 13.10     | 6.38  | 5.71      | 4.08  | 12.54 |
| CogView-4                | 1024       | DM   | 26.97     | 17.73   | 18.52     | 7.08  | 7.76      | 10.24 | 14.72 |
| SEED-X                   | 1024       | MM   | 27.93     | 26.61   | 18.19     | 9.75  | 10.90     | 9.20  | 17.10 |
| BAGEL                    | 1024       | MM   | 33.67     | 24.20   | 20.04     | 10.52 | 9.09      | 10.54 | 18.01 |
| SDXL-1.0-refiner         | 1024       | DM   | 26.47     | 22.27   | 24.00     | 15.55 | 11.14     | 8.85  | 18.05 |
| SDXL-1.0                 | 1024       | DM   | 26.66     | 21.66   | 27.59     | 13.88 | 11.63     | 11.21 | 18.77 |
| Ideogram V2              | 1024       | DM   | 37.72     | 21.05   | 24.81     | 13.84 | 11.44     | 11.50 | 20.06 |
| FLUX.1-[dev]             | 1024       | DM   | 36.77     | 28.46   | 28.15     | 16.54 | 11.38     | 14.77 | 22.68 |
| Infinity-8B              | 1024       | AR   | 24.00     | 22.98   | 35.27     | 14.22 | 21.44     | 20.80 | 23.12 |
| FLUX.1-[dev] (recaption) | 1024       | DM   | 30.39     | 32.13   | 29.74     | 19.01 | 16.95     | 14.36 | 23.76 |
| FLUX.1-[pro]             | 1024       | DM   | 45.48     | 36.55   | 33.53     | 22.77 | 23.90     | 23.35 | 30.93 |
| HiDream-I1-Full          | 1024       | DM   | 48.57     | 38.47   | 32.24     | 22.86 | 26.53     | 24.60 | 32.21 |
| GPT-4o                   | 1024       | MM   | 67.06     | 63.61   | 66.87     | 65.17 | 58.49     | 50.37 | 61.93 |
| FLUX-Reason (o3)         | 1024       | DM   | 42.04     | 38.27   | 34.84     | 26.81 | 21.50     | 16.71 | 30.03 |
| FLUX-Reason (R1-7B)      | 1024       | DM   | 49.94     | 41.14   | 43.68     | 31.59 | 30.90     | 23.04 | 36.71 |
| FLUX-Reason (R1)         | 1024       | DM   | 57.23     | 43.83   | 47.78     | 34.42 | 31.93     | 25.95 | 40.19 |

Table 8: MMMG-Score ( $\times 100$ ) for **Mathematics** across prevalent image generation models. The top three average scores are highlighted in green, blue, and orange.

| Model                    | Resolution | Type | Preschool | Primary | Secondary | High  | Undergrad | PhD   | Avg   |
|--------------------------|------------|------|-----------|---------|-----------|-------|-----------|-------|-------|
| LlamaGen                 | 512        | AR   | 19.03     | 5.38    | 3.99      | 0.76  | 0.0       | 1.59  | 5.12  |
| Emu-3                    | 720        | MM   | 15.91     | 9.52    | 10.47     | 4.92  | 4.35      | 2.0   | 7.86  |
| JanusFlow-1.3B           | 384        | AR   | 33.52     | 13.8    | 11.5      | 3.43  | 2.62      | 5.63  | 11.75 |
| Janus-pro-7B             | 384        | AR   | 34.73     | 19.37   | 13.41     | 7.11  | 1.99      | 4.71  | 13.55 |
| SimpleAR                 | 1024       | AR   | 34.32     | 15.99   | 16.06     | 6.6   | 5.02      | 4.9   | 13.81 |
| SDXL-1.0                 | 1024       | DM   | 25.81     | 23.02   | 22.99     | 9.47  | 7.12      | 7.86  | 16.04 |
| SDXL-1.0-refiner         | 1024       | DM   | 26.83     | 18.96   | 24.3      | 9.91  | 8.01      | 8.87  | 16.15 |
| BLIP3-o                  | 1024       | MM   | 41.33     | 22.14   | 17.88     | 8.39  | 6.31      | 5.23  | 16.88 |
| Ideogram V2              | 1024       | DM   | 32.08     | 19.07   | 24.34     | 11.6  | 13.68     | 8.36  | 18.19 |
| CogView-4                | 1024       | DM   | 42.43     | 25.81   | 21.77     | 10.85 | 9.98      | 4.77  | 19.27 |
| SEED-X                   | 1024       | MM   | 38.67     | 24.54   | 28.38     | 10.4  | 7.42      | 6.45  | 19.31 |
| BAGEL                    | 1024       | MM   | 48.13     | 27.79   | 22.68     | 10.38 | 8.9       | 6.16  | 20.67 |
| Infinity-8B              | 1024       | AR   | 38.45     | 23.72   | 33.18     | 19.69 | 20.28     | 17.51 | 25.47 |
| FLUX.1-[dev]             | 1024       | DM   | 46.6      | 36.02   | 33.15     | 19.78 | 17.43     | 11.69 | 27.45 |
| FLUX.1-[dev] (recaption) | 1024       | DM   | 40.55     | 36.78   | 32.18     | 20.78 | 20.45     | 17.83 | 28.09 |
| HiDream-I1-Full          | 1024       | DM   | 52.88     | 35.25   | 36.72     | 21.28 | 22.25     | 20.29 | 31.44 |
| FLUX.1-[pro]             | 1024       | DM   | 57.79     | 38.19   | 39.08     | 21.87 | 26.61     | 18.78 | 33.72 |
| GPT-4o                   | 1024       | MM   | 67.15     | 55.16   | 64.74     | 56.05 | 51.01     | 48.97 | 57.18 |
| FLUX-Reason (o3)         | 1024       | DM   | 51.68     | 34.82   | 35.24     | 18.15 | 21.76     | 21.53 | 30.53 |
| FLUX-Reason (R1-7B)      | 1024       | DM   | 56.27     | 42.36   | 46.75     | 30.58 | 28.74     | 29.67 | 39.06 |
| FLUX-Reason (R1)         | 1024       | DM   | 52.56     | 43.24   | 40.17     | 28.64 | 25.61     | 21.95 | 35.36 |

Table 9: MMMG-Score ( $\times 100$ ) for **Economics** across prevalent image generation models. Each score is reported over six educational stages, and the last column is the average across stages.

| Model                    | Resolution | Type | Preschool | Primary | Secondary | High  | Undergrad | PhD   | Avg   |
|--------------------------|------------|------|-----------|---------|-----------|-------|-----------|-------|-------|
| LlamaGen                 | 512        | AR   | 2.99      | 0.5     | 0.16      | 0.21  | 0.75      | 0.78  | 0.9   |
| Emu-3                    | 720        | MM   | 2.76      | 0.6     | 1.75      | 0.97  | 0.53      | 1.56  | 1.36  |
| JanusFlow-1.3B           | 384        | AR   | 6.25      | 4.47    | 5.44      | 1.56  | 1.26      | 1.83  | 3.47  |
| SimpleAR                 | 1024       | AR   | 8.39      | 4.59    | 2.61      | 1.84  | 1.63      | 1.96  | 3.5   |
| BAGEL                    | 1024       | MM   | 11.17     | 8.54    | 4.17      | 3.94  | 2.12      | 2.58  | 5.42  |
| Janus-pro-7B             | 384        | AR   | 12.66     | 6.09    | 5.83      | 4.35  | 4.07      | 4.27  | 6.21  |
| SEED-X                   | 1024       | MM   | 16.08     | 9.02    | 6.56      | 4.15  | 3.34      | 3.14  | 7.05  |
| SDXL-1.0                 | 1024       | DM   | 5.56      | 12.52   | 6.37      | 8.55  | 5.39      | 5.21  | 7.27  |
| BLIP3-o                  | 1024       | MM   | 17.02     | 10.58   | 5.39      | 5.58  | 3.03      | 3.18  | 7.46  |
| SDXL-1.0-refiner         | 1024       | DM   | 5.09      | 12.73   | 10.33     | 9.14  | 5.6       | 7.26  | 8.36  |
| CogView-4                | 1024       | DM   | 17.74     | 9.3     | 9.32      | 8.47  | 6.06      | 5.75  | 9.44  |
| Ideogram V2              | 1024       | DM   | 12.54     | 16.18   | 8.05      | 8.64  | 5.69      | 7.22  | 9.72  |
| FLUX.1-[dev] (recaption) | 1024       | DM   | 18.17     | 12.04   | 16.46     | 13.64 | 9.42      | 11.15 | 13.48 |
| Infinity-8B              | 1024       | AR   | 17.26     | 16.71   | 15.14     | 12.48 | 9.77      | 11.73 | 13.85 |
| FLUX.1-[dev]             | 1024       | DM   | 21.54     | 18.51   | 16.36     | 13.79 | 11.41     | 11.45 | 15.51 |
| FLUX.1-[pro]             | 1024       | DM   | 35.83     | 23.37   | 23.71     | 20.48 | 15.02     | 18.17 | 22.76 |
| HiDream-I1-Full          | 1024       | DM   | 39.06     | 23.04   | 27.46     | 20.33 | 15.85     | 17.76 | 23.92 |
| GPT-4o                   | 1024       | MM   | 54.85     | 38.87   | 48.78     | 44.14 | 33.82     | 33.4  | 42.31 |
| FLUX-Reason (o3)         | 1024       | DM   | 31.52     | 22.19   | 26.32     | 19.71 | 16.08     | 14.5  | 21.72 |
| FLUX-Reason (R1-7B)      | 1024       | DM   | 37.1      | 27.23   | 29.7      | 26.84 | 22.33     | 19.2  | 27.07 |
| FLUX-Reason (R1)         | 1024       | DM   | 44.45     | 28.11   | 27.44     | 28.34 | 19.52     | 20.0  | 27.98 |

Table 10: MMMG-Score ( $\times 100$ ) for **Engineering** across prevalent image generation models. The top three average scores are highlighted in green, blue, and orange.

| Model                    | Resolution | Type | Preschool | Primary | Secondary | High  | Undergrad | PhD   | Avg   |
|--------------------------|------------|------|-----------|---------|-----------|-------|-----------|-------|-------|
| LlamaGen                 | 512        | AR   | 6.45      | 3.93    | 1.27      | 1.28  | 2.41      | 0.60  | 2.66  |
| Emu-3                    | 720        | MM   | 22.35     | 6.43    | 5.26      | 7.83  | 2.97      | 3.27  | 8.02  |
| JanusFlow-1.3B           | 384        | AR   | 22.52     | 12.13   | 6.77      | 7.58  | 4.69      | 5.42  | 9.85  |
| SimpleAR                 | 1024       | AR   | 25.64     | 11.71   | 6.27      | 8.33  | 5.77      | 5.65  | 10.56 |
| Ideogram V2              | 1024       | DM   | 23.90     | 16.15   | 12.89     | 11.23 | 9.47      | 8.83  | 13.74 |
| BLIP3-o                  | 1024       | MM   | 32.44     | 18.52   | 7.40      | 8.34  | 9.03      | 7.81  | 13.92 |
| Janus-pro-7B             | 384        | AR   | 31.17     | 22.12   | 12.34     | 11.70 | 8.00      | 7.83  | 15.53 |
| CogView-4                | 1024       | DM   | 28.53     | 16.57   | 15.81     | 15.31 | 8.81      | 8.05  | 15.51 |
| SDXL-1.0-refiner         | 1024       | DM   | 36.96     | 24.81   | 15.35     | 21.83 | 13.93     | 11.03 | 20.65 |
| FLUX.1-[dev]             | 1024       | DM   | 32.03     | 24.24   | 20.57     | 20.79 | 13.29     | 15.20 | 21.02 |
| SDXL-1.0                 | 1024       | DM   | 36.57     | 21.34   | 18.24     | 23.45 | 12.95     | 14.99 | 21.26 |
| BAGEL                    | 1024       | MM   | 41.24     | 26.26   | 21.48     | 18.92 | 11.99     | 11.25 | 21.86 |
| FLUX.1-[dev] (recaption) | 1024       | DM   | 37.31     | 22.10   | 26.15     | 21.69 | 12.72     | 13.81 | 22.30 |
| SEED-X                   | 1024       | MM   | 44.50     | 29.48   | 21.02     | 21.88 | 11.85     | 12.62 | 23.56 |
| Infinity-8B              | 1024       | AR   | 41.61     | 27.92   | 27.19     | 29.26 | 16.60     | 19.57 | 27.03 |
| HiDream-I1-Full          | 1024       | DM   | 48.97     | 34.73   | 31.32     | 27.01 | 18.01     | 22.63 | 30.44 |
| FLUX.1-[pro]             | 1024       | DM   | 51.16     | 35.38   | 31.36     | 27.52 | 19.39     | 20.81 | 30.94 |
| GPT-4o                   | 1024       | MM   | 77.32     | 59.48   | 54.32     | 62.20 | 41.62     | 41.50 | 56.07 |
| FLUX-Reason (o3)         | 1024       | DM   | 45.04     | 32.53   | 32.38     | 29.93 | 22.03     | 20.74 | 30.44 |
| FLUX-Reason (R1-7B)      | 1024       | DM   | 52.69     | 39.23   | 35.65     | 35.36 | 21.72     | 24.40 | 34.84 |
| FLUX-Reason (R1)         | 1024       | DM   | 58.21     | 43.84   | 42.47     | 46.07 | 28.58     | 23.85 | 40.50 |

Table 11: MMMG-Score ( $\times 100$ ) for **Geography** across prevalent image generation models. The top three average scores are highlighted in green, blue, and orange.

| Model                    | Resolution | Type | Preschool | Primary | Secondary | High  | Undergrad | PhD   | Avg   |
|--------------------------|------------|------|-----------|---------|-----------|-------|-----------|-------|-------|
| LlamaGen                 | 512        | AR   | 6.87      | 3.60    | 6.77      | 6.43  | 3.90      | 3.23  | 5.13  |
| Emu-3                    | 720        | MM   | 12.92     | 19.21   | 15.16     | 17.98 | 8.56      | 7.80  | 13.61 |
| Ideogram V2              | 1024       | DM   | 14.83     | 18.37   | 18.27     | 15.91 | 9.38      | 8.04  | 14.13 |
| CogView-4                | 1024       | DM   | 20.98     | 17.37   | 21.09     | 16.40 | 12.92     | 11.42 | 16.70 |
| JanusFlow-1.3B           | 384        | AR   | 24.87     | 20.22   | 17.46     | 16.93 | 8.62      | 13.37 | 16.91 |
| SimpleAR                 | 1024       | AR   | 25.43     | 16.80   | 21.62     | 16.98 | 13.72     | 9.45  | 17.33 |
| BLIP3-o                  | 1024       | MM   | 23.98     | 21.65   | 21.55     | 16.80 | 12.42     | 11.67 | 18.01 |
| Janus-pro-7B             | 384        | AR   | 33.48     | 23.14   | 26.99     | 15.67 | 13.55     | 10.83 | 20.61 |
| FLUX.1-[dev] (recaption) | 1024       | DM   | 22.30     | 20.60   | 26.53     | 21.09 | 17.99     | 16.01 | 20.75 |
| FLUX.1-[dev]             | 1024       | DM   | 25.28     | 26.94   | 25.34     | 23.14 | 17.91     | 13.48 | 22.02 |
| BAGEL                    | 1024       | MM   | 26.80     | 26.74   | 30.98     | 21.82 | 16.79     | 13.68 | 22.80 |
| Infinity-8B              | 1024       | AR   | 26.20     | 30.23   | 25.79     | 32.01 | 20.50     | 17.28 | 25.33 |
| SDXL-1.0-refiner         | 1024       | DM   | 21.50     | 30.06   | 39.67     | 39.31 | 18.87     | 15.35 | 27.46 |
| SDXL-1.0                 | 1024       | DM   | 26.55     | 26.80   | 39.79     | 37.01 | 25.53     | 16.35 | 28.67 |
| HiDream-I1-Full          | 1024       | DM   | 32.60     | 35.34   | 35.92     | 30.93 | 26.89     | 20.91 | 30.43 |
| SEED-X                   | 1024       | MM   | 35.65     | 34.96   | 38.98     | 36.08 | 20.57     | 22.03 | 31.38 |
| FLUX.1-[pro]             | 1024       | DM   | 40.06     | 33.12   | 34.43     | 33.92 | 25.72     | 21.69 | 31.49 |
| GPT-4o                   | 1024       | MM   | 65.40     | 55.80   | 57.91     | 54.07 | 44.19     | 37.70 | 52.51 |
| FLUX-Reason (o3)         | 1024       | DM   | 37.17     | 29.37   | 39.21     | 32.14 | 30.34     | 23.92 | 32.02 |
| FLUX-Reason (R1-7B)      | 1024       | DM   | 40.82     | 34.40   | 41.36     | 34.30 | 28.60     | 23.56 | 33.84 |
| FLUX-Reason (R1)         | 1024       | DM   | 49.87     | 46.02   | 43.91     | 44.26 | 32.44     | 27.47 | 40.66 |

Table 12: MMMG-Score ( $\times 100$ ) for **Sociology** across prevalent image generation models. The top three average scores are highlighted in green, blue, and orange.

| Model                    | Resolution | Type | Preschool | Primary | Secondary | High  | Undergrad | PhD   | Avg   |
|--------------------------|------------|------|-----------|---------|-----------|-------|-----------|-------|-------|
| LlamaGen                 | 512        | AR   | 5.27      | 0.94    | 2.42      | 1.07  | 0.71      | 0.79  | 1.87  |
| Emu-3                    | 720        | MM   | 7.94      | 2.21    | 1.78      | 0.99  | 0.86      | 0.78  | 2.43  |
| SimpleAR                 | 1024       | AR   | 16.16     | 3.09    | 3.96      | 2.61  | 2.56      | 0.44  | 4.80  |
| JanusFlow-1.3B           | 384        | AR   | 23.34     | 6.26    | 6.66      | 2.94  | 5.28      | 1.55  | 7.67  |
| Ideogram V2              | 1024       | DM   | 15.76     | 8.14    | 6.63      | 10.76 | 6.48      | 5.33  | 8.85  |
| SDXL-1.0                 | 1024       | DM   | 20.11     | 8.52    | 7.84      | 8.85  | 4.78      | 5.97  | 9.35  |
| CogView-4                | 1024       | DM   | 20.41     | 9.59    | 8.99      | 8.49  | 7.77      | 4.60  | 9.97  |
| BAGEL                    | 1024       | MM   | 25.00     | 7.83    | 8.38      | 7.64  | 8.26      | 5.02  | 10.35 |
| BLIP3-o                  | 1024       | MM   | 29.82     | 8.90    | 7.94      | 7.18  | 5.36      | 3.85  | 10.51 |
| Janus-pro-7B             | 384        | AR   | 27.83     | 10.41   | 10.68     | 6.15  | 6.49      | 4.11  | 10.95 |
| SDXL-1.0-refiner         | 1024       | DM   | 26.10     | 7.24    | 10.35     | 12.36 | 4.65      | 7.04  | 11.29 |
| SEED-X                   | 1024       | MM   | 31.69     | 12.58   | 13.39     | 9.13  | 9.67      | 4.03  | 13.42 |
| Infinity-8B              | 1024       | AR   | 18.39     | 15.70   | 12.93     | 13.44 | 13.02     | 8.74  | 13.70 |
| FLUX.1-[dev] (recaption) | 1024       | DM   | 27.72     | 13.44   | 14.77     | 14.52 | 12.96     | 10.26 | 15.61 |
| FLUX.1-[dev]             | 1024       | DM   | 29.87     | 13.95   | 15.05     | 15.15 | 13.16     | 9.08  | 16.04 |
| FLUX.1-[pro]             | 1024       | DM   | 40.67     | 20.98   | 20.31     | 22.79 | 18.20     | 12.02 | 22.50 |
| HiDream-1I-Full          | 1024       | DM   | 43.59     | 24.01   | 26.99     | 20.26 | 24.63     | 16.02 | 25.92 |
| GPT-4o                   | 1024       | MM   | 67.10     | 41.20   | 44.80     | 44.45 | 44.00     | 27.41 | 44.83 |
| FLUX-Reason (o3)         | 1024       | DM   | 35.66     | 20.21   | 22.97     | 21.27 | 20.79     | 14.98 | 22.65 |
| FLUX-Reason (R1-7B)      | 1024       | DM   | 45.72     | 24.64   | 27.21     | 25.57 | 26.34     | 16.01 | 27.58 |
| FLUX-Reason (R1)         | 1024       | DM   | 48.09     | 30.53   | 32.31     | 32.10 | 25.33     | 17.30 | 30.94 |

Table 13: MMMG-Score ( $\times 100$ ) for **Literature** across prevalent image generation models. The top three average scores are highlighted in green, blue, and orange.

| Model                    | Resolution | Type | Preschool | Primary | Secondary | High  | Undergrad | PhD   | Avg   |
|--------------------------|------------|------|-----------|---------|-----------|-------|-----------|-------|-------|
| LlamaGen                 | 512        | AR   | 15.93     | 9.45    | 4.64      | 3.09  | 1.65      | 2.00  | 6.13  |
| Emu-3                    | 720        | MM   | 13.05     | 7.25    | 5.88      | 5.66  | 3.32      | 2.04  | 6.20  |
| Ideogram V2              | 1024       | DM   | 16.81     | 8.98    | 8.50      | 8.71  | 9.96      | 7.02  | 10.00 |
| JanusFlow-1.3B           | 384        | AR   | 37.01     | 17.38   | 4.29      | 5.82  | 2.39      | 1.85  | 11.46 |
| BAGEL                    | 1024       | MM   | 21.80     | 19.86   | 8.44      | 7.56  | 6.40      | 6.83  | 11.81 |
| SimpleAR                 | 1024       | AR   | 32.28     | 15.99   | 7.25      | 8.72  | 4.13      | 4.29  | 12.11 |
| CogView-4                | 1024       | DM   | 26.87     | 15.95   | 12.47     | 9.39  | 9.17      | 7.51  | 13.56 |
| BLIP3-o                  | 1024       | MM   | 35.30     | 16.80   | 7.67      | 9.70  | 5.90      | 6.77  | 13.69 |
| SDXL-1.0                 | 1024       | DM   | 21.30     | 19.16   | 10.30     | 12.24 | 11.98     | 9.41  | 14.06 |
| Infinity-8B              | 1024       | AR   | 16.32     | 14.08   | 12.91     | 15.03 | 14.78     | 11.97 | 14.18 |
| SDXL-1.0-refiner         | 1024       | DM   | 22.50     | 18.33   | 11.37     | 12.36 | 11.07     | 10.62 | 14.38 |
| Janus-pro-7B             | 384        | AR   | 44.15     | 16.64   | 9.17      | 7.76  | 5.61      | 5.07  | 14.73 |
| SEED-X                   | 1024       | MM   | 35.03     | 21.86   | 9.07      | 14.25 | 8.68      | 7.15  | 16.01 |
| FLUX.1-[dev] (recaption) | 1024       | DM   | 23.40     | 18.99   | 13.00     | 13.83 | 14.76     | 14.31 | 16.38 |
| FLUX.1-[dev]             | 1024       | DM   | 26.50     | 21.65   | 17.37     | 12.23 | 13.16     | 14.37 | 17.55 |
| FLUX.1-[pro]             | 1024       | DM   | 43.07     | 30.25   | 23.59     | 21.12 | 23.82     | 24.96 | 27.80 |
| HiDream-1I-Full          | 1024       | DM   | 41.92     | 28.26   | 28.68     | 27.37 | 21.59     | 28.28 | 29.35 |
| GPT-4o                   | 1024       | MM   | 66.45     | 54.25   | 46.51     | 46.60 | 42.93     | 47.37 | 50.69 |
| FLUX-Reason (o3)         | 1024       | DM   | 37.54     | 30.37   | 28.98     | 26.91 | 21.38     | 30.35 | 29.25 |
| FLUX-Reason (R1-7B)      | 1024       | DM   | 42.49     | 31.73   | 32.52     | 28.24 | 25.78     | 32.52 | 32.21 |
| FLUX-Reason (R1)         | 1024       | DM   | 44.26     | 39.58   | 33.28     | 36.71 | 25.80     | 33.27 | 35.48 |

Table 14: MMMG-Score ( $\times 100$ ) for **History** across prevalent image generation models. The top three average scores are highlighted in green, blue, and orange.

| Model                    | Resolution | Type | Preschool | Primary | Secondary | High  | Undergrad | PhD   | Avg   |
|--------------------------|------------|------|-----------|---------|-----------|-------|-----------|-------|-------|
| LlamaGen                 | 512        | AR   | 1.21      | 3.41    | 1.12      | 1.90  | 0.42      | 0.95  | 1.50  |
| Emu-3                    | 720        | MM   | 4.03      | 7.47    | 3.97      | 5.43  | 3.43      | 2.33  | 4.44  |
| Ideogram V2              | 1024       | DM   | 3.96      | 2.15    | 7.03      | 4.91  | 4.92      | 8.77  | 5.29  |
| JanusFlow-1.3B           | 384        | AR   | 6.85      | 11.81   | 8.82      | 6.88  | 2.85      | 2.51  | 6.62  |
| SimpleAR                 | 1024       | AR   | 6.91      | 10.15   | 7.58      | 7.29  | 5.61      | 4.88  | 7.07  |
| BAGEL                    | 1024       | MM   | 8.50      | 11.82   | 8.25      | 5.61  | 5.80      | 6.80  | 7.80  |
| CogView-4                | 1024       | DM   | 6.75      | 8.37    | 9.44      | 10.09 | 6.73      | 7.51  | 8.15  |
| Janus-pro-7B             | 384        | AR   | 13.08     | 10.68   | 10.97     | 8.06  | 5.09      | 5.90  | 8.96  |
| Infinity-8B              | 1024       | AR   | 11.09     | 9.82    | 9.48      | 11.35 | 8.04      | 8.61  | 9.73  |
| SDXL-1.0                 | 1024       | DM   | 3.05      | 13.77   | 13.70     | 15.97 | 7.35      | 6.44  | 10.05 |
| BLIP3-o                  | 1024       | MM   | 14.07     | 12.89   | 12.71     | 10.18 | 6.44      | 6.01  | 10.38 |
| FLUX.1-[dev] (recaption) | 1024       | DM   | 10.65     | 11.90   | 13.00     | 8.19  | 9.01      | 9.65  | 10.40 |
| SDXL-1.0-refiner         | 1024       | DM   | 2.43      | 14.95   | 17.77     | 16.85 | 9.18      | 5.79  | 11.16 |
| FLUX.1-[dev]             | 1024       | DM   | 9.95      | 15.15   | 15.78     | 12.29 | 9.99      | 12.69 | 12.64 |
| SEED-X                   | 1024       | MM   | 17.78     | 18.90   | 18.80     | 18.21 | 10.28     | 14.27 | 16.37 |
| FLUX.1-[pro]             | 1024       | DM   | 26.40     | 21.26   | 24.56     | 22.47 | 18.74     | 20.21 | 22.27 |
| HiDream-I1-Full          | 1024       | DM   | 26.84     | 29.92   | 29.80     | 24.63 | 24.81     | 28.54 | 27.42 |
| GPT-4o                   | 1024       | MM   | 36.84     | 44.38   | 45.62     | 42.76 | 37.76     | 42.59 | 41.66 |
| FLUX-Reason (o3)         | 1024       | DM   | 16.21     | 26.69   | 28.87     | 22.72 | 26.05     | 26.58 | 24.52 |
| FLUX-Reason (R1-7B)      | 1024       | DM   | 28.65     | 28.29   | 29.51     | 26.22 | 25.55     | 27.57 | 27.63 |
| FLUX-Reason (R1)         | 1024       | DM   | 28.45     | 34.43   | 38.21     | 34.17 | 30.42     | 31.39 | 32.84 |

Table 15: MMMG-Score ( $\times 100$ ) for **Philosophy** across prevalent image generation models. Scores are reported over five educational stages (no Preschool data). The top three average scores are highlighted in green, blue, and orange.

| Model                    | Resolution | Type | Primary | Secondary | High  | Undergrad | PhD   | Avg   |
|--------------------------|------------|------|---------|-----------|-------|-----------|-------|-------|
| LlamaGen                 | 512        | AR   | 5.23    | 0.95      | 0.81  | 0.77      | 1.8   | 1.91  |
| Emu-3                    | 720        | MM   | 6.89    | 2.83      | 2.51  | 0.96      | 4.14  | 3.47  |
| JanusFlow-1.3B           | 384        | AR   | 14.63   | 3.06      | 1.19  | 3.48      | 4.89  | 5.45  |
| SimpleAR                 | 1024       | AR   | 11.52   | 3.26      | 3.88  | 3.35      | 8.16  | 6.03  |
| BLIP3-o                  | 1024       | MM   | 20.79   | 4.91      | 2.11  | 2.62      | 8.12  | 7.71  |
| BAGEL                    | 1024       | MM   | 16.51   | 7.9       | 3.84  | 2.51      | 8.69  | 7.89  |
| Janus-pro-7B             | 384        | AR   | 18.42   | 5.33      | 4.4   | 5.35      | 7.96  | 8.29  |
| SDXL-1.0                 | 1024       | DM   | 18.35   | 8.01      | 6.4   | 6.63      | 8.0   | 9.48  |
| SEED-X                   | 1024       | MM   | 20.49   | 8.63      | 6.36  | 4.95      | 7.98  | 9.68  |
| SDXL-1.0-refiner         | 1024       | DM   | 20.21   | 8.68      | 7.82  | 7.46      | 5.87  | 10.01 |
| CogView-4                | 1024       | DM   | 23.83   | 10.28     | 5.98  | 5.49      | 9.08  | 10.93 |
| FLUX.1-[dev] (recaption) | 1024       | DM   | 23.55   | 15.98     | 14.44 | 13.33     | 9.47  | 15.35 |
| Ideogram V2              | 1024       | DM   | 23.0    | 17.64     | 14.31 | 15.63     | 14.09 | 16.93 |
| Infinity-8B              | 1024       | AR   | 21.7    | 17.86     | 15.12 | 14.1      | 18.93 | 17.54 |
| FLUX.1-[dev]             | 1024       | DM   | 29.05   | 18.28     | 15.98 | 12.37     | 19.23 | 18.98 |
| FLUX.1-[pro]             | 1024       | DM   | 36.72   | 29.32     | 26.34 | 22.16     | 26.02 | 28.11 |
| HiDream-I1-Full          | 1024       | DM   | 40.39   | 30.78     | 27.82 | 19.4      | 28.24 | 29.33 |
| GPT-4o                   | 1024       | MM   | 59.58   | 48.55     | 45.21 | 42.35     | 45.03 | 48.14 |
| FLUX-Reason (o3)         | 1024       | DM   | 33.48   | 22.78     | 27.33 | 21.1      | 25.76 | 26.09 |
| FLUX-Reason (R1-7B)      | 1024       | DM   | 41.57   | 34.6      | 30.02 | 26.55     | 30.47 | 32.64 |
| FLUX-Reason (R1)         | 1024       | DM   | 41.5    | 36.08     | 30.45 | 26.04     | 27.84 | 32.38 |

## E Ablation Study

### E.1 Self-Consistency of MMMG-Eval

A truly reliable evaluation metric must exhibit self-consistency: when applied to ground-truth images, MMMG should recover the original knowledge graph with minimal error. We assess this property by running OpenAI-o3 as the evaluator and compute two complementary scores on all reference images: the knowledge fidelity term

$$1 - \text{GED}(G_{\text{gen}}, G_{\text{ref}})$$

and the unified accuracy

$$\text{u-acc} = \frac{N_e^{\text{correct}} + N_d^{\text{correct}}}{N_e + N_d},$$

where  $N_e, N_d$  are the total number of entities and dependencies, and  $N_e^{\text{correct}}, N_d^{\text{correct}}$  the correctly recovered counts. Table 16 reports these metrics across six educational stages. We observe consistently high fidelity ( $> 0.92$ ) and accuracy ( $> 0.91$ ) without any stage-specific tuning, confirming that MMMG faithfully grounds and retrieves structured knowledge from its source images.

|         | Preschool | Primary | Secondary | High School | Undergrad | PhD    |
|---------|-----------|---------|-----------|-------------|-----------|--------|
| 1 - GED | 0.9373    | 0.9336  | 0.9318    | 0.9307      | 0.9287    | 0.9360 |
| u-acc   | 0.9261    | 0.9218  | 0.9154    | 0.9110      | 0.9154    | 0.9240 |

Table 16: Self-consistency evaluation: structural fidelity (1-GED) and unified accuracy (u-acc) of MMMG on ground-truth images across different educational stages.

To directly assess the accuracy and reliability of the evaluator (OpenAI-o3), we conducted a human vs. model comparison study. We evenly sampled 480 images across all educational levels and had domain experts annotate their corresponding knowledge graphs. As shown in Table 17, the evaluator demonstrates high alignment with human annotations, with an average recall exceeding 94% across models, indicating that missed detections and false penalties are rare.

| Model       | P (%) | R (%) |
|-------------|-------|-------|
| GPT-4o      | 96.52 | 96.48 |
| FLUX-Reason | 94.27 | 94.13 |
| SDXL        | 92.74 | 94.70 |

Table 17: Average Precision (P) and Recall (R) between OpenAI-o3 and expert evaluators.

### E.2 Robustness of MMMG Evaluation

In addition to self-consistency, a reliable evaluation metric should be robust to changes in its underlying judgment engine. To assess this, we recompute the MMMG-Score using three variants of OpenAI’s language models—OpenAI-o3 (high reasoning effort), OpenAI-o3, and OpenAI-o1 (lightweight)—on the same set of generated images. As shown in Table 18, the relative rankings of generation models (GPT-4o-Image, FLUX-Reason (R1), FLUX.1-[pro], Infinity-8B, SEED-X) remain consistent across all evaluator variants, with only minor score fluctuations. This stability indicates that MMMG-Score is robust to variations in the choice of LLM.

| Evaluator      | GPT-4o | FLUX-Reason (R1) | FLUX.1-[pro] | Infinity-8B | SEED-X |
|----------------|--------|------------------|--------------|-------------|--------|
| OpenAI-o3-high | 50.20  | 34.45            | 27.14        | 19.18       | 18.16  |
| OpenAI-o3      | 51.07  | 34.62            | 27.33        | 19.54       | 18.49  |
| OpenAI-o1      | 52.81  | 37.25            | 29.52        | 21.73       | 20.86  |

Table 18: Robustness evaluation: MMMG-Score (higher is better) recomputed with different OpenAI LLM variants. The preserved model ranking and low score variance confirm stability against evaluator changes.

# F Visualization

## F.1 Preschool

### F.1.1 Biology

Question: Visualize an educational diagram illustrating how heat influences the water cycle through transpiration and surface water interactions.

|                                                                                                          |                                                                                     |                                                                                     |                                                                                                                                                                        |                                                                                                                                                              |                                                                           |
|----------------------------------------------------------------------------------------------------------|-------------------------------------------------------------------------------------|-------------------------------------------------------------------------------------|------------------------------------------------------------------------------------------------------------------------------------------------------------------------|--------------------------------------------------------------------------------------------------------------------------------------------------------------|---------------------------------------------------------------------------|
| <p>GPT-4o</p> 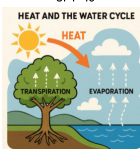          |    |    | <p>Entities:</p> <ul style="list-style-type: none"> <li>'Heat': True</li> <li>'Ocean': False</li> <li>'Surface Water': True</li> <li>'Transpiration': True</li> </ul>  | <p>Dependencies:</p> <ul style="list-style-type: none"> <li>'Causes(Heat, Transpiration)': True</li> <li>'Contains(Surface Water, Ocean)': False</li> </ul>  | <p>1-GED: 0.60<br/>Segments: 27<br/>Readability: 1.00<br/>MMMG: 0.60</p>  |
| <p>FLUX-Reason (R)</p>  |    |    | <p>Entities:</p> <ul style="list-style-type: none"> <li>'Heat': True</li> <li>'Ocean': True</li> <li>'Surface Water': True</li> <li>'Transpiration': True</li> </ul>   | <p>Dependencies:</p> <ul style="list-style-type: none"> <li>'Causes(Heat, Transpiration)': True</li> <li>'Contains(Surface Water, Ocean)': False</li> </ul>  | <p>1-GED: 0.91<br/>Segments: 64<br/>Readability: 1.00<br/>MMMG: 0.91</p>  |
| <p>HiDream-11-full</p>  |    |    | <p>Entities:</p> <ul style="list-style-type: none"> <li>'Heat': True</li> <li>'Ocean': False</li> <li>'Surface Water': True</li> <li>'Transpiration': True</li> </ul>  | <p>Dependencies:</p> <ul style="list-style-type: none"> <li>'Causes(Heat, Transpiration)': False</li> <li>'Contains(Surface Water, Ocean)': False</li> </ul> | <p>1-GED: 0.67<br/>Segments: 78<br/>Readability: 0.91<br/>MMMG: 0.61</p>  |
| <p>FLUX1-[pro]</p>     |   |   | <p>Entities:</p> <ul style="list-style-type: none"> <li>'Heat': True</li> <li>'Ocean': False</li> <li>'Surface Water': True</li> <li>'Transpiration': False</li> </ul> | <p>Dependencies:</p> <ul style="list-style-type: none"> <li>'Causes(Heat, Transpiration)': False</li> <li>'Contains(Surface Water, Ocean)': False</li> </ul> | <p>1-GED: 0.50<br/>Segments: 36<br/>Readability: 1.00<br/>MMMG: 0.50</p>  |
| <p>Ideogram V2</p>    |  |  | <p>Entities:</p> <ul style="list-style-type: none"> <li>'Heat': True</li> <li>'Ocean': False</li> <li>'Surface Water': True</li> <li>'Transpiration': False</li> </ul> | <p>Dependencies:</p> <ul style="list-style-type: none"> <li>'Causes(Heat, Transpiration)': False</li> <li>'Contains(Surface Water, Ocean)': False</li> </ul> | <p>1-GED: 0.50<br/>Segments: 120<br/>Readability: 0.44<br/>MMMG: 0.22</p> |
| <p>Infinity-8B</p>    |  |  | <p>Entities:</p> <ul style="list-style-type: none"> <li>'Heat': True</li> <li>'Ocean': True</li> <li>'Surface Water': True</li> <li>'Transpiration': False</li> </ul>  | <p>Dependencies:</p> <ul style="list-style-type: none"> <li>'Causes(Heat, Transpiration)': False</li> <li>'Contains(Surface Water, Ocean)': False</li> </ul> | <p>1-GED: 0.67<br/>Segments: 40<br/>Readability: 1.00<br/>MMMG: 0.67</p>  |
| <p>Seed-X</p>         |  |  | <p>Entities:</p> <ul style="list-style-type: none"> <li>'Heat': True</li> <li>'Ocean': False</li> <li>'Surface Water': True</li> <li>'Transpiration': False</li> </ul> | <p>Dependencies:</p> <ul style="list-style-type: none"> <li>'Causes(Heat, Transpiration)': False</li> <li>'Contains(Surface Water, Ocean)': False</li> </ul> | <p>1-GED: 0.50<br/>Segments: 63<br/>Readability: 1.00<br/>MMMG: 0.50</p>  |

Figure 3: MMMG Benchmark visualization for seven representative models on a Preschool-Biology example. Each row corresponds to one model and, from left to right, displays the generated image, its segmentation map, the reconstructed knowledge graph, the extracted entity and dependency lists, and finally the overall MMMG-Score along with its component sub-scores.

## F.1.2 Chemistry

Question: Design a playful chart about how bubbles are formed in different liquids, incorporating vibrant colors and fun shapes.

|                                                                                                           |                                                                                     |                                                                                     |                                                                                                                                                                                                              |                                                                                                                                                                                                                                                                                                                                    |                                                                                    |
|-----------------------------------------------------------------------------------------------------------|-------------------------------------------------------------------------------------|-------------------------------------------------------------------------------------|--------------------------------------------------------------------------------------------------------------------------------------------------------------------------------------------------------------|------------------------------------------------------------------------------------------------------------------------------------------------------------------------------------------------------------------------------------------------------------------------------------------------------------------------------------|------------------------------------------------------------------------------------|
| <p>GPT-4o</p>            |    |    | <p>Entities:</p> <ul style="list-style-type: none"> <li>'bubbles': True</li> <li>'formation process': False</li> <li>'fun shapes': True</li> <li>'liquids': True</li> <li>'vibrant colors': True</li> </ul>  | <p>Dependencies:</p> <ul style="list-style-type: none"> <li>'causes(formation process, bubbles)': False</li> <li>'contains(bubbles, formation process)': False</li> <li>'defines(liquids, fun shapes)': False</li> <li>'defines(liquids, vibrant colors)': False</li> <li>'requires(formation process, liquids)': False</li> </ul> | <p>1-GED: 0.50</p> <p>Segments: 70</p> <p>Readability: 100</p> <p>MMMG: 0.50</p>   |
| <p>FLUX-Reason (R1)</p>  |    |    | <p>Entities:</p> <ul style="list-style-type: none"> <li>'bubbles': True</li> <li>'formation process': False</li> <li>'fun shapes': True</li> <li>'liquids': True</li> <li>'vibrant colors': False</li> </ul> | <p>Dependencies:</p> <ul style="list-style-type: none"> <li>'causes(formation process, bubbles)': False</li> <li>'contains(bubbles, formation process)': False</li> <li>'defines(liquids, fun shapes)': False</li> <li>'defines(liquids, vibrant colors)': False</li> <li>'requires(formation process, liquids)': False</li> </ul> | <p>1-GED: 0.29</p> <p>Segments: 43</p> <p>Readability: 100</p> <p>MMMG: 0.29</p>   |
| <p>HiDream-11-full</p>   |    |    | <p>Entities:</p> <ul style="list-style-type: none"> <li>'bubbles': True</li> <li>'formation process': False</li> <li>'fun shapes': True</li> <li>'liquids': True</li> <li>'vibrant colors': True</li> </ul>  | <p>Dependencies:</p> <ul style="list-style-type: none"> <li>'causes(formation process, bubbles)': False</li> <li>'contains(bubbles, formation process)': False</li> <li>'defines(liquids, fun shapes)': False</li> <li>'defines(liquids, vibrant colors)': False</li> <li>'requires(formation process, liquids)': False</li> </ul> | <p>1-GED: 0.50</p> <p>Segments: 62</p> <p>Readability: 100</p> <p>MMMG: 0.50</p>   |
| <p>FLUX1-[pro]</p>      |   |   | <p>Entities:</p> <ul style="list-style-type: none"> <li>'bubbles': True</li> <li>'formation process': False</li> <li>'fun shapes': True</li> <li>'liquids': True</li> <li>'vibrant colors': True</li> </ul>  | <p>Dependencies:</p> <ul style="list-style-type: none"> <li>'causes(formation process, bubbles)': False</li> <li>'contains(bubbles, formation process)': False</li> <li>'defines(liquids, fun shapes)': True</li> <li>'defines(liquids, vibrant colors)': True</li> <li>'requires(formation process, liquids)': False</li> </ul>   | <p>1-GED: 0.80</p> <p>Segments: 1</p> <p>Readability: 100</p> <p>MMMG: 0.80</p>    |
| <p>Ideogram V2</p>     |  |  | <p>Entities:</p> <ul style="list-style-type: none"> <li>'bubbles': True</li> <li>'formation process': False</li> <li>'fun shapes': True</li> <li>'liquids': True</li> <li>'vibrant colors': True</li> </ul>  | <p>Dependencies:</p> <ul style="list-style-type: none"> <li>'causes(formation process, bubbles)': False</li> <li>'contains(bubbles, formation process)': False</li> <li>'defines(liquids, fun shapes)': False</li> <li>'defines(liquids, vibrant colors)': False</li> <li>'requires(formation process, liquids)': False</li> </ul> | <p>1-GED: 0.50</p> <p>Segments: 80</p> <p>Readability: 0.89</p> <p>MMMG: 0.44</p>  |
| <p>Infinity-8B</p>     |  |  | <p>Entities:</p> <ul style="list-style-type: none"> <li>'bubbles': True</li> <li>'formation process': False</li> <li>'fun shapes': True</li> <li>'liquids': True</li> <li>'vibrant colors': True</li> </ul>  | <p>Dependencies:</p> <ul style="list-style-type: none"> <li>'causes(formation process, bubbles)': False</li> <li>'contains(bubbles, formation process)': False</li> <li>'defines(liquids, fun shapes)': False</li> <li>'defines(liquids, vibrant colors)': False</li> <li>'requires(formation process, liquids)': False</li> </ul> | <p>1-GED: 0.50</p> <p>Segments: 208</p> <p>Readability: 0.00</p> <p>MMMG: 0.00</p> |
| <p>Seed-X</p>          |  |  | <p>Entities:</p> <ul style="list-style-type: none"> <li>'bubbles': True</li> <li>'formation process': False</li> <li>'fun shapes': True</li> <li>'liquids': True</li> <li>'vibrant colors': True</li> </ul>  | <p>Dependencies:</p> <ul style="list-style-type: none"> <li>'causes(formation process, bubbles)': False</li> <li>'contains(bubbles, formation process)': False</li> <li>'defines(liquids, fun shapes)': False</li> <li>'defines(liquids, vibrant colors)': False</li> <li>'requires(formation process, liquids)': False</li> </ul> | <p>1-GED: 0.50</p> <p>Segments: 138</p> <p>Readability: 0.24</p> <p>MMMG: 0.12</p> |

Figure 4: MMMG Benchmark visualization for seven representative models on a Preschool-Chemistry example. Each row corresponds to one model and, from left to right, displays the generated image, its segmentation map, the reconstructed knowledge graph, the extracted entity and dependency lists, and finally the overall MMMG-Score along with its component sub-scores.

### F.1.3 Mathematics

Question: Create a fun calendar featuring the days of the week, using different colors and cartoon animals to represent each day.

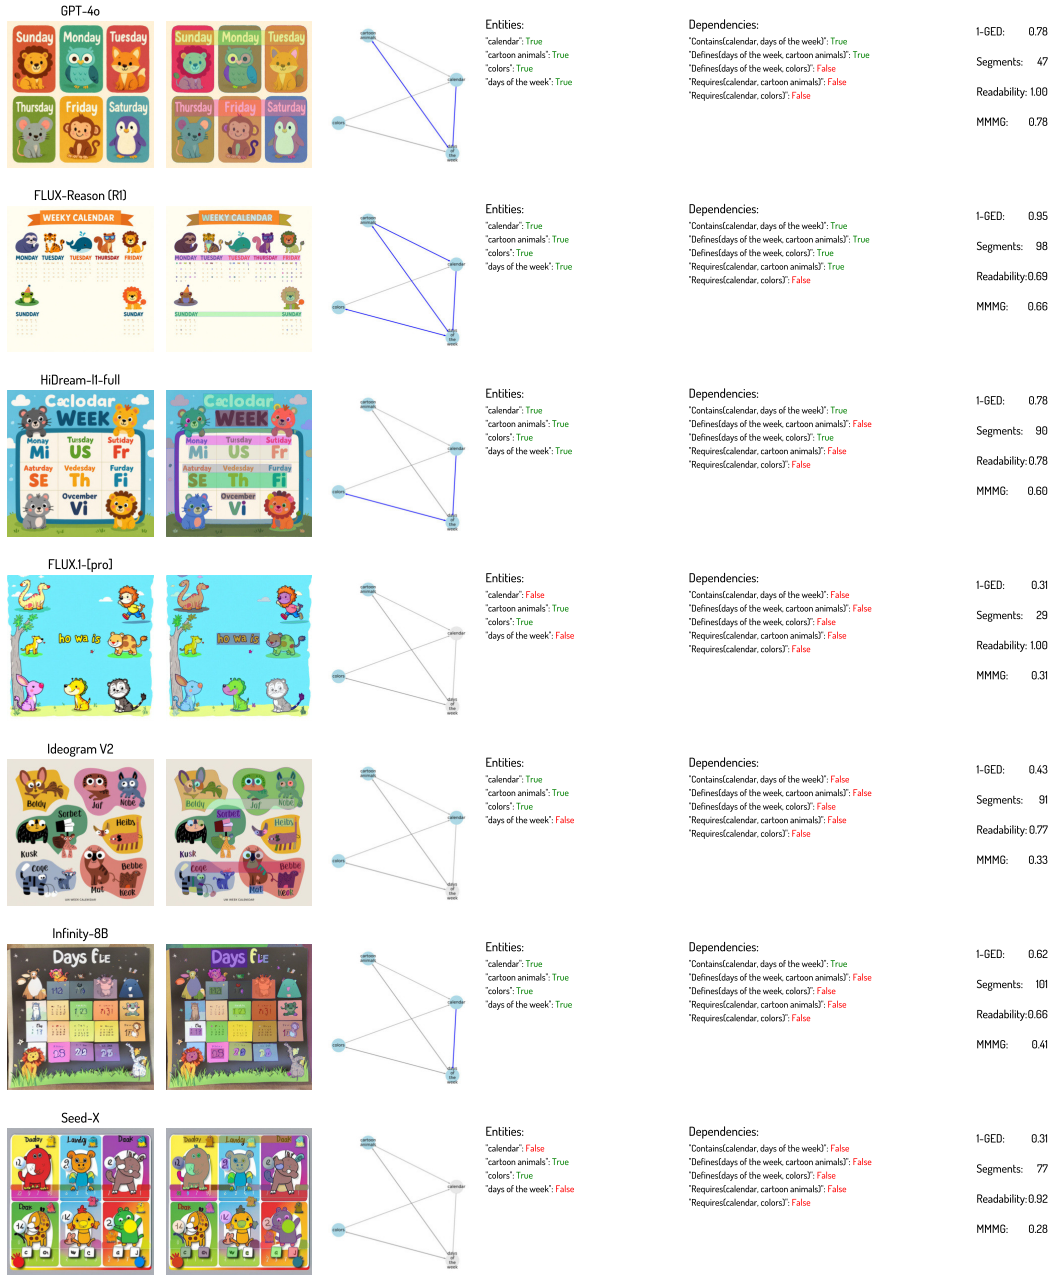

Figure 5: MMMG Benchmark visualization for seven representative models on a Preschool-Mathematics example. Each row corresponds to one model and, from left to right, displays the generated image, its segmentation map, the reconstructed knowledge graph, the extracted entity and dependency lists, and finally the overall MMMG-Score along with its component sub-scores.

## F.1.4 Engineering

Question: Visualize an educational poster illustrating the steps to create a paper shirt through folding techniques.

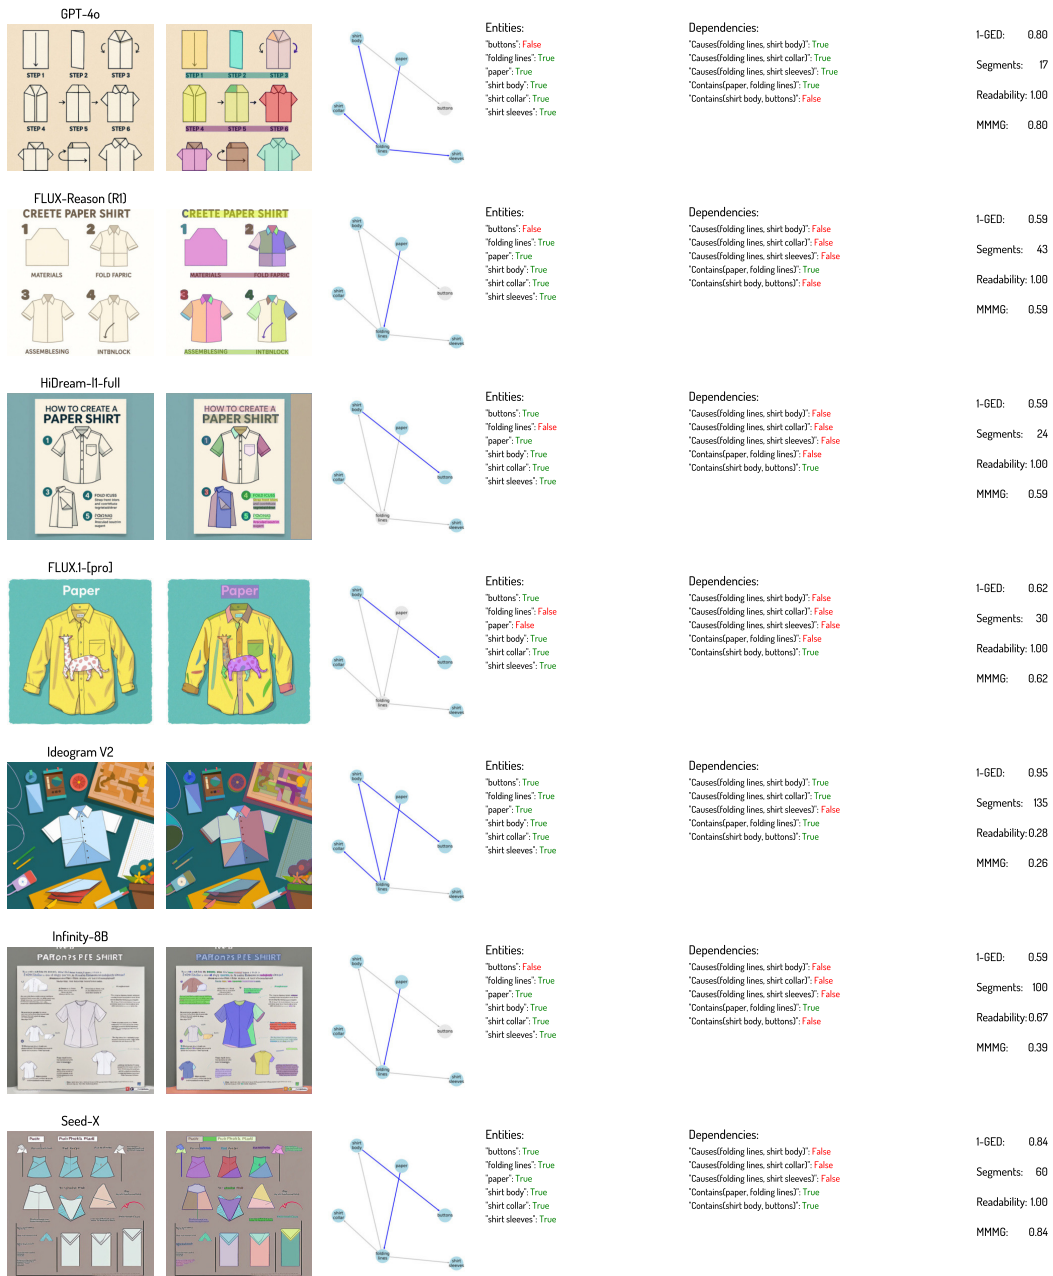

Figure 6: MMMG Benchmark visualization for seven representative models on a Preschool-Engineering example. Each row corresponds to one model and, from left to right, displays the generated image, its segmentation map, the reconstructed knowledge graph, the extracted entity and dependency lists, and finally the overall MMMG-Score along with its component sub-scores.

## F.1.5 Geography

Question: Visualize an infographic depicting the different forms of precipitation and their characteristics.

| Model            | Image | Segmentation Map | Knowledge Graph | Entities                                                                                               | Dependencies                                                                                                                                                                          | I-GED       | Segments      | Readability       | MMMG       |
|------------------|-------|------------------|-----------------|--------------------------------------------------------------------------------------------------------|---------------------------------------------------------------------------------------------------------------------------------------------------------------------------------------|-------------|---------------|-------------------|------------|
| GPT-4o           |       |                  |                 | Entities:<br>'Hail': True<br>'Precipitation': True<br>'Rain': True<br>'Sleet': True<br>'Snow': True    | Dependencies:<br>'Contains(Precipitation, Hail)': True<br>'Contains(Precipitation, Rain)': True<br>'Contains(Precipitation, Sleet)': True<br>'Contains(Precipitation, Snow)': True    | 1-GED: 1.00 | Segments: 41  | Readability: 1.00 | MMMG: 1.00 |
| FLUX-Reason (R1) |       |                  |                 | Entities:<br>'Hail': True<br>'Precipitation': True<br>'Rain': True<br>'Sleet': False<br>'Snow': True   | Dependencies:<br>'Contains(Precipitation, Hail)': True<br>'Contains(Precipitation, Rain)': True<br>'Contains(Precipitation, Sleet)': False<br>'Contains(Precipitation, Snow)': True   | 1-GED: 0.50 | Segments: 43  | Readability: 1.00 | MMMG: 0.50 |
| HiDream-11-full  |       |                  |                 | Entities:<br>'Hail': False<br>'Precipitation': True<br>'Rain': True<br>'Sleet': False<br>'Snow': False | Dependencies:<br>'Contains(Precipitation, Hail)': False<br>'Contains(Precipitation, Rain)': True<br>'Contains(Precipitation, Sleet)': False<br>'Contains(Precipitation, Snow)': False | 1-GED: 0.33 | Segments: 22  | Readability: 1.00 | MMMG: 0.33 |
| FLUX1-[pro]      |       |                  |                 | Entities:<br>'Hail': False<br>'Precipitation': True<br>'Rain': True<br>'Sleet': False<br>'Snow': False | Dependencies:<br>'Contains(Precipitation, Hail)': False<br>'Contains(Precipitation, Rain)': True<br>'Contains(Precipitation, Sleet)': False<br>'Contains(Precipitation, Snow)': False | 1-GED: 0.36 | Segments: 27  | Readability: 1.00 | MMMG: 0.36 |
| Ideogram V2      |       |                  |                 | Entities:<br>'Hail': False<br>'Precipitation': True<br>'Rain': True<br>'Sleet': False<br>'Snow': False | Dependencies:<br>'Contains(Precipitation, Hail)': False<br>'Contains(Precipitation, Rain)': True<br>'Contains(Precipitation, Sleet)': False<br>'Contains(Precipitation, Snow)': False | 1-GED: 0.36 | Segments: 69  | Readability: 1.00 | MMMG: 0.36 |
| Infinity-8B      |       |                  |                 | Entities:<br>'Hail': False<br>'Precipitation': True<br>'Rain': True<br>'Sleet': False<br>'Snow': False | Dependencies:<br>'Contains(Precipitation, Hail)': False<br>'Contains(Precipitation, Rain)': True<br>'Contains(Precipitation, Sleet)': False<br>'Contains(Precipitation, Snow)': False | 1-GED: 0.33 | Segments: 204 | Readability: 0.00 | MMMG: 0.00 |
| Seed-X           |       |                  |                 | Entities:<br>'Hail': True<br>'Precipitation': True<br>'Rain': True<br>'Sleet': True<br>'Snow': True    | Dependencies:<br>'Contains(Precipitation, Hail)': True<br>'Contains(Precipitation, Rain)': True<br>'Contains(Precipitation, Sleet)': True<br>'Contains(Precipitation, Snow)': True    | 1-GED: 1.00 | Segments: 83  | Readability: 0.86 | MMMG: 0.86 |

Figure 7: MMMG Benchmark visualization for seven representative models on a Preschool-Geography example. Each row corresponds to one model and, from left to right, displays the generated image, its segmentation map, the reconstructed knowledge graph, the extracted entity and dependency lists, and finally the overall MMMG-Score along with its component sub-scores.

## F.1.6 Economics

Question: Visualize the key elements and dynamics of a grocery shopping experience in an informative infographic.

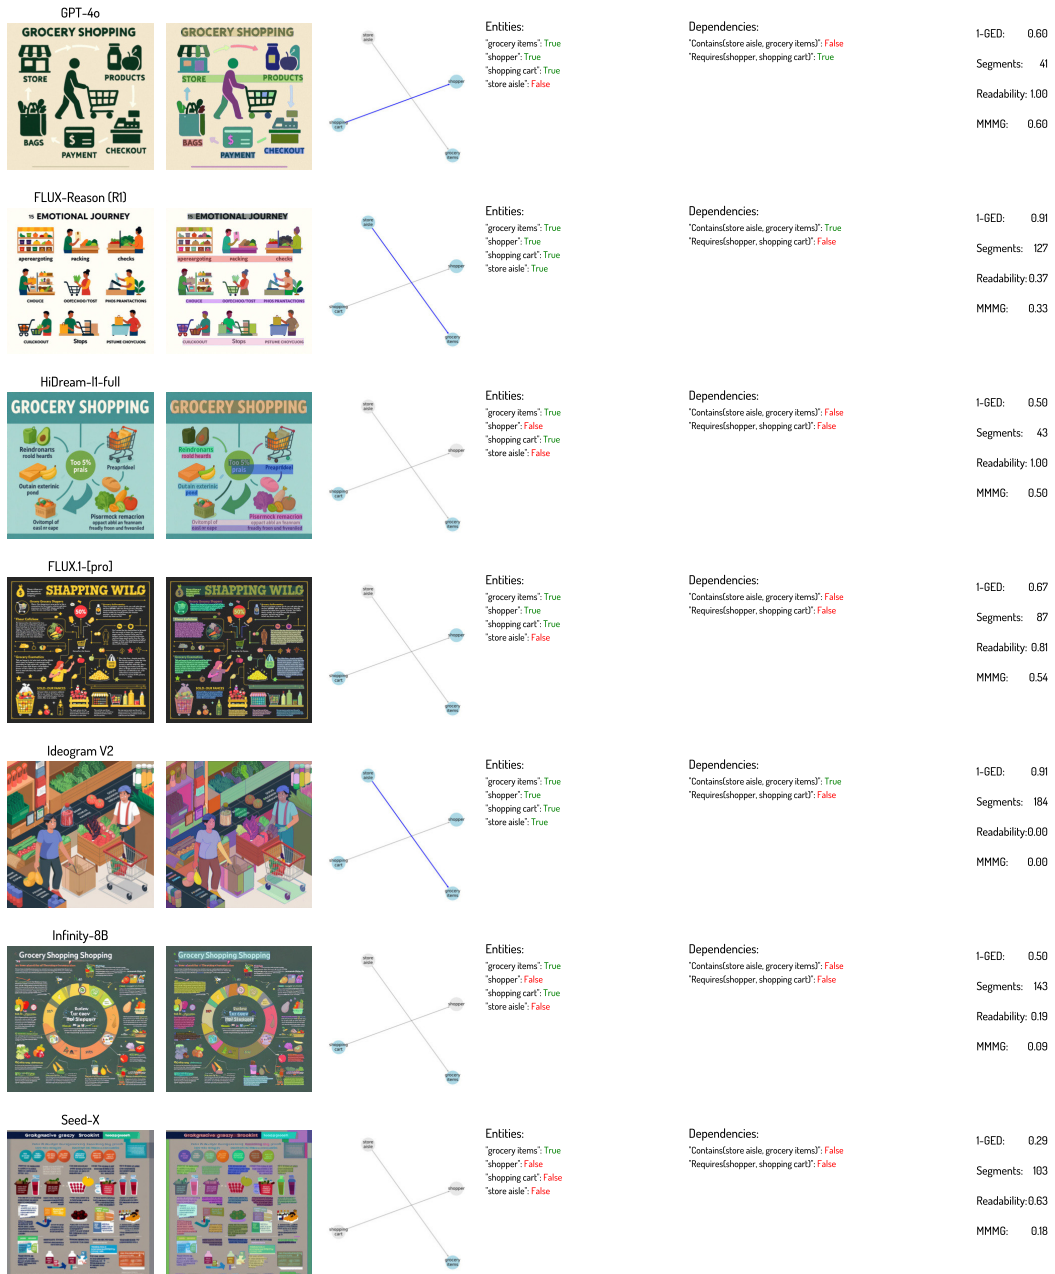

Figure 8: MMMG Benchmark visualization for seven representative models on a Preschool-Economics example. Each row corresponds to one model and, from left to right, displays the generated image, its segmentation map, the reconstructed knowledge graph, the extracted entity and dependency lists, and finally the overall MMMG-Score along with its component sub-scores.

## F.1.7 Sociology

Question: Visualize an infographic depicting the meanings and functions of traffic light colors.

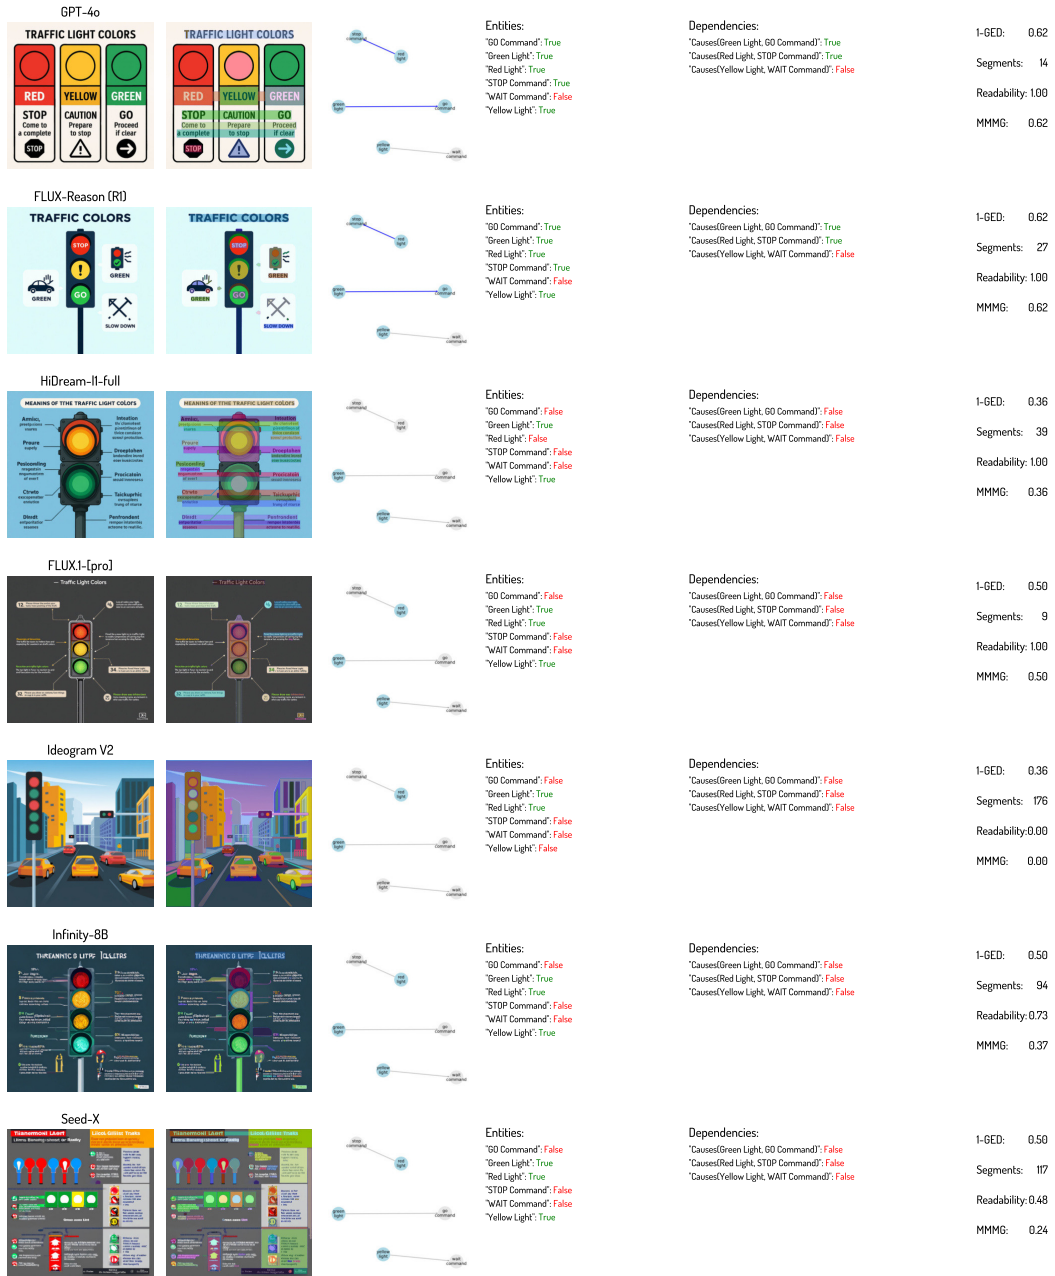

Figure 9: MMMG Benchmark visualization for seven representative models on a Preschool-Sociology example. Each row corresponds to one model and, from left to right, displays the generated image, its segmentation map, the reconstructed knowledge graph, the extracted entity and dependency lists, and finally the overall MMMG-Score along with its component sub-scores.

## F.1.8 History

Question: Visualize an educational infographic showcasing the key structural components of the Great Wall of China and their functions.

|  |  |  |                                                                                                                                                                                                                                                                                                                                                                                                                                                         |                                                                                                                                                                                                                                                                                                                                                                                                                                                                                                                                                                                                                                                                                          |                                                                                    |
|--|--|--|---------------------------------------------------------------------------------------------------------------------------------------------------------------------------------------------------------------------------------------------------------------------------------------------------------------------------------------------------------------------------------------------------------------------------------------------------------|------------------------------------------------------------------------------------------------------------------------------------------------------------------------------------------------------------------------------------------------------------------------------------------------------------------------------------------------------------------------------------------------------------------------------------------------------------------------------------------------------------------------------------------------------------------------------------------------------------------------------------------------------------------------------------------|------------------------------------------------------------------------------------|
|  |  |  | <p>Entities:</p> <ul style="list-style-type: none"> <li>'Bigger rocks and stones': False</li> <li>'Carriageway': True</li> <li>'Great Wall': True</li> <li>'Kilin-fired bricks': False</li> <li>'Multi-function wall': False</li> <li>'Ramparts': True</li> <li>'Signal Beacons': True</li> <li>'Surface of stone slabs and bricks': True</li> <li>'Tamped layer of earth and rubble': False</li> <li>'Towers': True</li> <li>... (0 more)</li> </ul>   | <p>Dependencies:</p> <ul style="list-style-type: none"> <li>'Contains(Great Wall, Bigger rocks and stones)': False</li> <li>'Contains(Great Wall, Carriageway)': True</li> <li>'Contains(Great Wall, Kilin-fired bricks)': False</li> <li>'Contains(Great Wall, Multi-function wall)': False</li> <li>'Contains(Great Wall, Ramparts)': True</li> <li>'Contains(Great Wall, Signal Beacons)': True</li> <li>'Contains(Great Wall, Surface of stone slabs and bricks)': True</li> <li>'Contains(Great Wall, Tamped layer of earth and rubble)': False</li> <li>'Contains(Great Wall, Towers)': True</li> <li>'Contains(Great Wall, Watchtowers)': True</li> <li>... (0 more)</li> </ul>   | <p>1-GED: 0.40</p> <p>Segments: 50</p> <p>Readability: 100</p> <p>MMMG: 0.40</p>   |
|  |  |  | <p>Entities:</p> <ul style="list-style-type: none"> <li>'Bigger rocks and stones': False</li> <li>'Carriageway': True</li> <li>'Great Wall': True</li> <li>'Kilin-fired bricks': False</li> <li>'Multi-function wall': False</li> <li>'Ramparts': True</li> <li>'Signal Beacons': False</li> <li>'Surface of stone slabs and bricks': False</li> <li>'Tamped layer of earth and rubble': False</li> <li>'Towers': True</li> <li>... (0 more)</li> </ul> | <p>Dependencies:</p> <ul style="list-style-type: none"> <li>'Contains(Great Wall, Bigger rocks and stones)': False</li> <li>'Contains(Great Wall, Carriageway)': True</li> <li>'Contains(Great Wall, Kilin-fired bricks)': False</li> <li>'Contains(Great Wall, Multi-function wall)': False</li> <li>'Contains(Great Wall, Ramparts)': True</li> <li>'Contains(Great Wall, Signal Beacons)': False</li> <li>'Contains(Great Wall, Surface of stone slabs and bricks)': False</li> <li>'Contains(Great Wall, Tamped layer of earth and rubble)': False</li> <li>'Contains(Great Wall, Towers)': True</li> <li>'Contains(Great Wall, Watchtowers)': True</li> <li>... (0 more)</li> </ul> | <p>1-GED: 0.32</p> <p>Segments: 32</p> <p>Readability: 100</p> <p>MMMG: 0.32</p>   |
|  |  |  | <p>Entities:</p> <ul style="list-style-type: none"> <li>'Bigger rocks and stones': False</li> <li>'Carriageway': True</li> <li>'Great Wall': True</li> <li>'Kilin-fired bricks': False</li> <li>'Multi-function wall': False</li> <li>'Ramparts': True</li> <li>'Signal Beacons': False</li> <li>'Surface of stone slabs and bricks': True</li> <li>'Tamped layer of earth and rubble': False</li> <li>'Towers': True</li> <li>... (0 more)</li> </ul>  | <p>Dependencies:</p> <ul style="list-style-type: none"> <li>'Contains(Great Wall, Bigger rocks and stones)': False</li> <li>'Contains(Great Wall, Carriageway)': True</li> <li>'Contains(Great Wall, Kilin-fired bricks)': False</li> <li>'Contains(Great Wall, Multi-function wall)': False</li> <li>'Contains(Great Wall, Ramparts)': True</li> <li>'Contains(Great Wall, Signal Beacons)': False</li> <li>'Contains(Great Wall, Surface of stone slabs and bricks)': True</li> <li>'Contains(Great Wall, Tamped layer of earth and rubble)': False</li> <li>'Contains(Great Wall, Towers)': True</li> <li>'Contains(Great Wall, Watchtowers)': True</li> <li>... (0 more)</li> </ul>  | <p>1-GED: 0.36</p> <p>Segments: 53</p> <p>Readability: 100</p> <p>MMMG: 0.36</p>   |
|  |  |  | <p>Entities:</p> <ul style="list-style-type: none"> <li>'Bigger rocks and stones': False</li> <li>'Carriageway': True</li> <li>'Great Wall': True</li> <li>'Kilin-fired bricks': False</li> <li>'Multi-function wall': False</li> <li>'Ramparts': True</li> <li>'Signal Beacons': False</li> <li>'Surface of stone slabs and bricks': False</li> <li>'Tamped layer of earth and rubble': False</li> <li>'Towers': True</li> <li>... (0 more)</li> </ul> | <p>Dependencies:</p> <ul style="list-style-type: none"> <li>'Contains(Great Wall, Bigger rocks and stones)': False</li> <li>'Contains(Great Wall, Carriageway)': True</li> <li>'Contains(Great Wall, Kilin-fired bricks)': False</li> <li>'Contains(Great Wall, Multi-function wall)': False</li> <li>'Contains(Great Wall, Ramparts)': True</li> <li>'Contains(Great Wall, Signal Beacons)': False</li> <li>'Contains(Great Wall, Surface of stone slabs and bricks)': False</li> <li>'Contains(Great Wall, Tamped layer of earth and rubble)': False</li> <li>'Contains(Great Wall, Towers)': True</li> <li>'Contains(Great Wall, Watchtowers)': True</li> <li>... (0 more)</li> </ul> | <p>1-GED: 0.32</p> <p>Segments: 23</p> <p>Readability: 100</p> <p>MMMG: 0.32</p>   |
|  |  |  | <p>Entities:</p> <ul style="list-style-type: none"> <li>'Bigger rocks and stones': False</li> <li>'Carriageway': True</li> <li>'Great Wall': True</li> <li>'Kilin-fired bricks': False</li> <li>'Multi-function wall': False</li> <li>'Ramparts': True</li> <li>'Signal Beacons': False</li> <li>'Surface of stone slabs and bricks': True</li> <li>'Tamped layer of earth and rubble': False</li> <li>'Towers': True</li> <li>... (0 more)</li> </ul>  | <p>Dependencies:</p> <ul style="list-style-type: none"> <li>'Contains(Great Wall, Bigger rocks and stones)': False</li> <li>'Contains(Great Wall, Carriageway)': True</li> <li>'Contains(Great Wall, Kilin-fired bricks)': False</li> <li>'Contains(Great Wall, Multi-function wall)': False</li> <li>'Contains(Great Wall, Ramparts)': True</li> <li>'Contains(Great Wall, Signal Beacons)': False</li> <li>'Contains(Great Wall, Surface of stone slabs and bricks)': True</li> <li>'Contains(Great Wall, Tamped layer of earth and rubble)': False</li> <li>'Contains(Great Wall, Towers)': True</li> <li>'Contains(Great Wall, Watchtowers)': True</li> <li>... (0 more)</li> </ul>  | <p>1-GED: 0.36</p> <p>Segments: 116</p> <p>Readability: 0.49</p> <p>MMMG: 0.18</p> |
|  |  |  | <p>Entities:</p> <ul style="list-style-type: none"> <li>'Bigger rocks and stones': True</li> <li>'Carriageway': True</li> <li>'Great Wall': True</li> <li>'Kilin-fired bricks': True</li> <li>'Multi-function wall': False</li> <li>'Ramparts': True</li> <li>'Signal Beacons': True</li> <li>'Surface of stone slabs and bricks': True</li> <li>'Tamped layer of earth and rubble': True</li> <li>'Towers': True</li> <li>... (0 more)</li> </ul>      | <p>Dependencies:</p> <ul style="list-style-type: none"> <li>'Contains(Great Wall, Bigger rocks and stones)': True</li> <li>'Contains(Great Wall, Carriageway)': True</li> <li>'Contains(Great Wall, Kilin-fired bricks)': True</li> <li>'Contains(Great Wall, Multi-function wall)': False</li> <li>'Contains(Great Wall, Ramparts)': True</li> <li>'Contains(Great Wall, Signal Beacons)': True</li> <li>'Contains(Great Wall, Surface of stone slabs and bricks)': True</li> <li>'Contains(Great Wall, Tamped layer of earth and rubble)': True</li> <li>'Contains(Great Wall, Towers)': True</li> <li>'Contains(Great Wall, Watchtowers)': True</li> <li>... (0 more)</li> </ul>      | <p>1-GED: 0.52</p> <p>Segments: 141</p> <p>Readability: 0.21</p> <p>MMMG: 0.11</p> |
|  |  |  | <p>Entities:</p> <ul style="list-style-type: none"> <li>'Bigger rocks and stones': False</li> <li>'Carriageway': True</li> <li>'Great Wall': True</li> <li>'Kilin-fired bricks': True</li> <li>'Multi-function wall': False</li> <li>'Ramparts': True</li> <li>'Signal Beacons': False</li> <li>'Surface of stone slabs and bricks': True</li> <li>'Tamped layer of earth and rubble': False</li> <li>'Towers': True</li> <li>... (0 more)</li> </ul>   | <p>Dependencies:</p> <ul style="list-style-type: none"> <li>'Contains(Great Wall, Bigger rocks and stones)': False</li> <li>'Contains(Great Wall, Carriageway)': True</li> <li>'Contains(Great Wall, Kilin-fired bricks)': True</li> <li>'Contains(Great Wall, Multi-function wall)': False</li> <li>'Contains(Great Wall, Ramparts)': True</li> <li>'Contains(Great Wall, Signal Beacons)': False</li> <li>'Contains(Great Wall, Surface of stone slabs and bricks)': True</li> <li>'Contains(Great Wall, Tamped layer of earth and rubble)': False</li> <li>'Contains(Great Wall, Towers)': True</li> <li>'Contains(Great Wall, Watchtowers)': True</li> <li>... (0 more)</li> </ul>   | <p>1-GED: 0.40</p> <p>Segments: 73</p> <p>Readability: 0.97</p> <p>MMMG: 0.39</p>  |

Figure 10: MMMG Benchmark visualization for seven representative models on a Preschool-History example. Each row corresponds to one model and, from left to right, displays the generated image, its segmentation map, the reconstructed knowledge graph, the extracted entity and dependency lists, and finally the overall MMMG-Score along with its component sub-scores.

## F.1.9 Literature

Question: Visualize an infographic of a treasure chest overflowing with various genres of children's books.

| Model            | Image 1 | Image 2 | Graph | Entities                                                                                                                                                                                                                    | Dependencies                                                                                                                                                                                                                                                                                                   | 1-GED | Segments | Readability | MMMG |
|------------------|---------|---------|-------|-----------------------------------------------------------------------------------------------------------------------------------------------------------------------------------------------------------------------------|----------------------------------------------------------------------------------------------------------------------------------------------------------------------------------------------------------------------------------------------------------------------------------------------------------------|-------|----------|-------------|------|
| GPT-4o           |         |         |       | <p>Entities:</p> <ul style="list-style-type: none"> <li>'book covers': True</li> <li>'children's books': True</li> <li>'colorful illustrations': True</li> <li>'genres': True</li> <li>'treasure chest': True</li> </ul>    | <p>Dependencies:</p> <ul style="list-style-type: none"> <li>'Contains(children's books, book covers)': True</li> <li>'Contains(children's books, colorful illustrations)': True</li> <li>'Contains(treasure chest, children's books)': True</li> <li>'Requires(children's books, genres)': False</li> </ul>    | 0.94  | 59       | 1.00        | 0.94 |
| FLUX-Reason (R1) |         |         |       | <p>Entities:</p> <ul style="list-style-type: none"> <li>'book covers': True</li> <li>'children's books': True</li> <li>'colorful illustrations': True</li> <li>'genres': True</li> <li>'treasure chest': True</li> </ul>    | <p>Dependencies:</p> <ul style="list-style-type: none"> <li>'Contains(children's books, book covers)': True</li> <li>'Contains(children's books, colorful illustrations)': False</li> <li>'Contains(treasure chest, children's books)': True</li> <li>'Requires(children's books, genres)': True</li> </ul>    | 0.94  | 70       | 1.00        | 0.94 |
| HiDream-11-full  |         |         |       | <p>Entities:</p> <ul style="list-style-type: none"> <li>'book covers': True</li> <li>'children's books': True</li> <li>'colorful illustrations': True</li> <li>'genres': False</li> <li>'treasure chest': True</li> </ul>   | <p>Dependencies:</p> <ul style="list-style-type: none"> <li>'Contains(children's books, book covers)': True</li> <li>'Contains(children's books, colorful illustrations)': True</li> <li>'Contains(treasure chest, children's books)': True</li> <li>'Requires(children's books, genres)': False</li> </ul>    | 0.62  | 52       | 1.00        | 0.62 |
| FLUX1-[pro]      |         |         |       | <p>Entities:</p> <ul style="list-style-type: none"> <li>'book covers': True</li> <li>'children's books': True</li> <li>'colorful illustrations': True</li> <li>'genres': False</li> <li>'treasure chest': True</li> </ul>   | <p>Dependencies:</p> <ul style="list-style-type: none"> <li>'Contains(children's books, book covers)': True</li> <li>'Contains(children's books, colorful illustrations)': True</li> <li>'Contains(treasure chest, children's books)': True</li> <li>'Requires(children's books, genres)': False</li> </ul>    | 0.62  | 73       | 0.97        | 0.60 |
| Ideogram V2      |         |         |       | <p>Entities:</p> <ul style="list-style-type: none"> <li>'book covers': True</li> <li>'children's books': False</li> <li>'colorful illustrations': False</li> <li>'genres': False</li> <li>'treasure chest': True</li> </ul> | <p>Dependencies:</p> <ul style="list-style-type: none"> <li>'Contains(children's books, book covers)': False</li> <li>'Contains(children's books, colorful illustrations)': False</li> <li>'Contains(treasure chest, children's books)': False</li> <li>'Requires(children's books, genres)': False</li> </ul> | 0.36  | 81       | 0.88        | 0.32 |
| Infinity-8B      |         |         |       | <p>Entities:</p> <ul style="list-style-type: none"> <li>'book covers': True</li> <li>'children's books': True</li> <li>'colorful illustrations': True</li> <li>'genres': False</li> <li>'treasure chest': True</li> </ul>   | <p>Dependencies:</p> <ul style="list-style-type: none"> <li>'Contains(children's books, book covers)': True</li> <li>'Contains(children's books, colorful illustrations)': True</li> <li>'Contains(treasure chest, children's books)': True</li> <li>'Requires(children's books, genres)': False</li> </ul>    | 0.62  | 156      | 0.04        | 0.03 |
| Seed-X           |         |         |       | <p>Entities:</p> <ul style="list-style-type: none"> <li>'book covers': True</li> <li>'children's books': True</li> <li>'colorful illustrations': True</li> <li>'genres': False</li> <li>'treasure chest': True</li> </ul>   | <p>Dependencies:</p> <ul style="list-style-type: none"> <li>'Contains(children's books, book covers)': True</li> <li>'Contains(children's books, colorful illustrations)': True</li> <li>'Contains(treasure chest, children's books)': True</li> <li>'Requires(children's books, genres)': False</li> </ul>    | 0.62  | 127      | 0.37        | 0.23 |

Figure 11: MMMG Benchmark visualization for seven representative models on a Preschool-Literature example. Each row corresponds to one model and, from left to right, displays the generated image, its segmentation map, the reconstructed knowledge graph, the extracted entity and dependency lists, and finally the overall MMMG-Score along with its component sub-scores.

## F.2 Primary School

### F.2.1 Biology

Question: Visualize an infographic comparing and contrasting radial and bilateral symmetry in biological organisms.

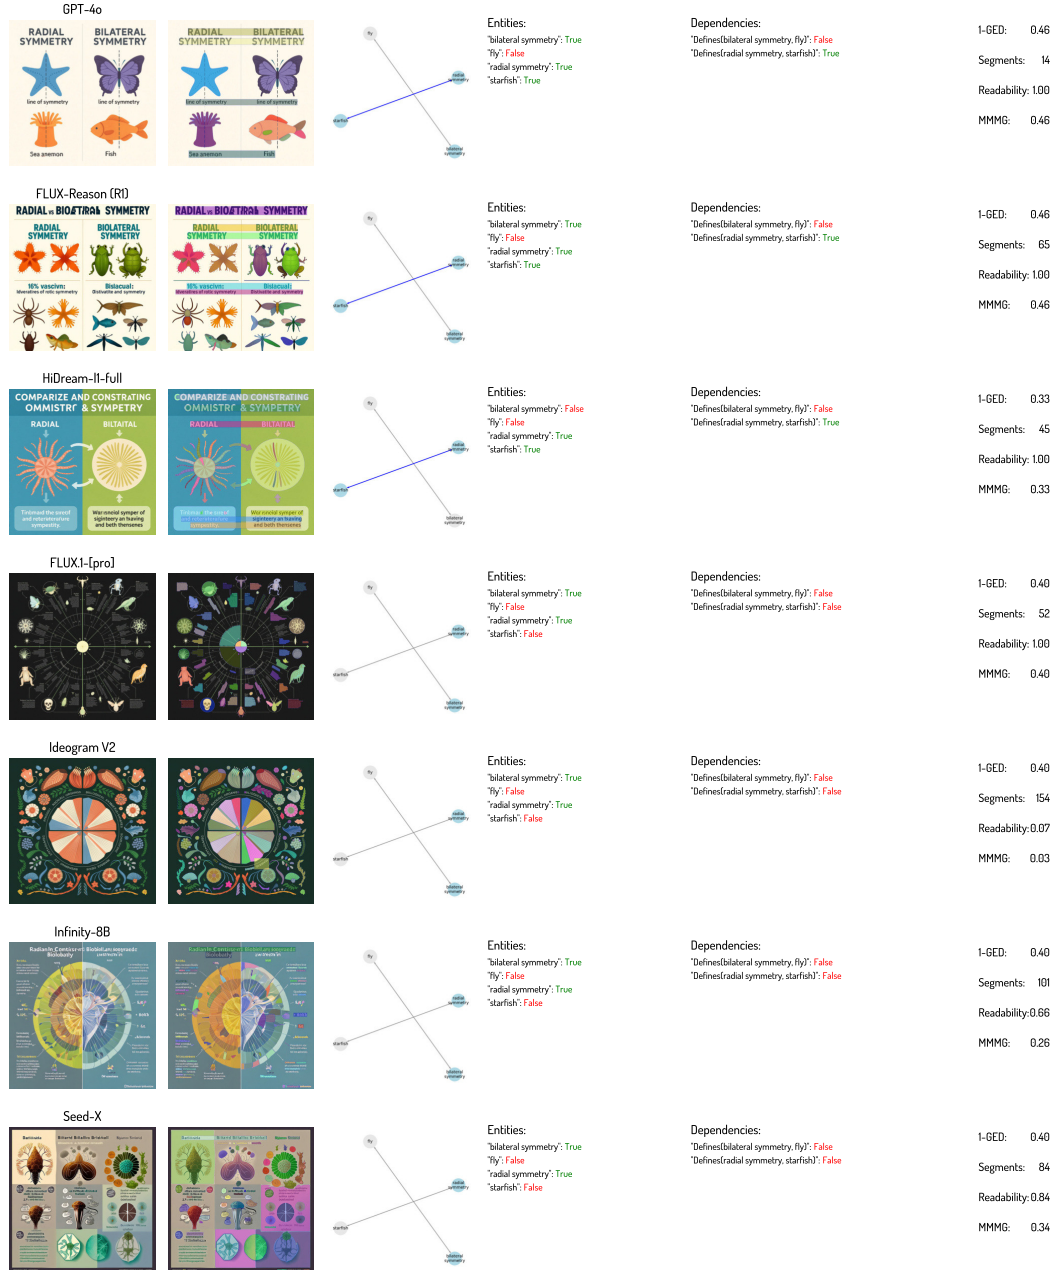

Figure 12: MMMG Benchmark visualization for seven representative models on a Primaryschool-Biology example. Each row corresponds to one model and, from left to right, displays the generated image, its segmentation map, the reconstructed knowledge graph, the extracted entity and dependency lists, and finally the overall MMMG-Score along with its component sub-scores.

## F.2.2 Chemistry

Question: Create an infographic comparing the properties of metals and nonmetals, using simple icons for each.

| Model            | Generated Image | Segmentation Map | Reconstructed Knowledge Graph | Entities                                                                                                                            | Dependencies                                                                                                                                                                                                                                                                                              | 1-GED | Segments | Readability | MMMG |
|------------------|-----------------|------------------|-------------------------------|-------------------------------------------------------------------------------------------------------------------------------------|-----------------------------------------------------------------------------------------------------------------------------------------------------------------------------------------------------------------------------------------------------------------------------------------------------------|-------|----------|-------------|------|
| GPT-4o           |                 |                  |                               | Entities:<br>"icon for metals": True<br>"icon for nonmetals": True<br>"metals": True<br>"nonmetals": True<br>"properties": False    | Dependencies:<br>"Contains(properties, icon for metals)": False<br>"Contains(properties, icon for nonmetals)": False<br>"Defines(metals, properties)": True<br>"Defines(nonmetals, properties)": True<br>"Requires(icon for metals, metals)": True<br>"Requires(icon for nonmetals, nonmetals)": True     | 0.42  | 23       | 1.00        | 0.42 |
| FLUX-Reason (R1) |                 |                  |                               | Entities:<br>"icon for metals": True<br>"icon for nonmetals": True<br>"metals": True<br>"nonmetals": True<br>"properties": True     | Dependencies:<br>"Contains(properties, icon for metals)": True<br>"Contains(properties, icon for nonmetals)": True<br>"Defines(metals, properties)": True<br>"Defines(nonmetals, properties)": True<br>"Requires(icon for metals, metals)": False<br>"Requires(icon for nonmetals, nonmetals)": False     | 0.92  | 50       | 1.00        | 0.92 |
| HiDream-11-full  |                 |                  |                               | Entities:<br>"icon for metals": True<br>"icon for nonmetals": True<br>"metals": True<br>"nonmetals": True<br>"properties": True     | Dependencies:<br>"Contains(properties, icon for metals)": False<br>"Contains(properties, icon for nonmetals)": False<br>"Defines(metals, properties)": True<br>"Defines(nonmetals, properties)": True<br>"Requires(icon for metals, metals)": False<br>"Requires(icon for nonmetals, nonmetals)": False   | 0.82  | 26       | 1.00        | 0.82 |
| FLUX1-[pro]      |                 |                  |                               | Entities:<br>"icon for metals": True<br>"icon for nonmetals": True<br>"metals": True<br>"nonmetals": True<br>"properties": True     | Dependencies:<br>"Contains(properties, icon for metals)": False<br>"Contains(properties, icon for nonmetals)": False<br>"Defines(metals, properties)": False<br>"Defines(nonmetals, properties)": False<br>"Requires(icon for metals, metals)": False<br>"Requires(icon for nonmetals, nonmetals)": False | 0.56  | 10       | 1.00        | 0.56 |
| Ideogram V2      |                 |                  |                               | Entities:<br>"icon for metals": True<br>"icon for nonmetals": False<br>"metals": False<br>"nonmetals": False<br>"properties": False | Dependencies:<br>"Contains(properties, icon for metals)": False<br>"Contains(properties, icon for nonmetals)": False<br>"Defines(metals, properties)": False<br>"Defines(nonmetals, properties)": False<br>"Requires(icon for metals, metals)": False<br>"Requires(icon for nonmetals, nonmetals)": False | 0.27  | 89       | 0.79        | 0.21 |
| Infinity-8B      |                 |                  |                               | Entities:<br>"icon for metals": True<br>"icon for nonmetals": True<br>"metals": True<br>"nonmetals": True<br>"properties": False    | Dependencies:<br>"Contains(properties, icon for metals)": False<br>"Contains(properties, icon for nonmetals)": False<br>"Defines(metals, properties)": False<br>"Defines(nonmetals, properties)": False<br>"Requires(icon for metals, metals)": False<br>"Requires(icon for nonmetals, nonmetals)": False | 0.47  | 106      | 0.60        | 0.28 |
| Seed-X           |                 |                  |                               | Entities:<br>"icon for metals": True<br>"icon for nonmetals": False<br>"metals": False<br>"nonmetals": False<br>"properties": False | Dependencies:<br>"Contains(properties, icon for metals)": False<br>"Contains(properties, icon for nonmetals)": False<br>"Defines(metals, properties)": False<br>"Defines(nonmetals, properties)": False<br>"Requires(icon for metals, metals)": False<br>"Requires(icon for nonmetals, nonmetals)": False | 0.27  | 101      | 0.66        | 0.17 |

Figure 13: MMMG Benchmark visualization for seven representative models on a Primaryschool-Chemistry example. Each row corresponds to one model and, from left to right, displays the generated image, its segmentation map, the reconstructed knowledge graph, the extracted entity and dependency lists, and finally the overall MMMG-Score along with its component sub-scores.

## F.2.3 Mathematics

Question: Visualize the use of playdough and toothpicks to create and understand 3D shapes.

| Model            | Generated Image | Segmentation Map | Reconstructed Knowledge Graph | Entities                                                                                                   | Dependencies                                                                                                                                                     | 1-GED | Segments | Readability | MMMG |
|------------------|-----------------|------------------|-------------------------------|------------------------------------------------------------------------------------------------------------|------------------------------------------------------------------------------------------------------------------------------------------------------------------|-------|----------|-------------|------|
| GPT-4o           |                 |                  |                               | <pre>Entities: 'cube': True 'edges': True 'playdough': True 'toothpicks': True 'vertices': True</pre>      | <pre>Dependencies: 'Contains(cube, edges)': True 'Contains(cube, vertices)': True 'Requires(cube, playdough)': True 'Requires(cube, toothpicks)': True</pre>     | 1.00  | 41       | 1.00        | 1.00 |
| FLUX-Reason (R1) |                 |                  |                               | <pre>Entities: 'cube': True 'edges': True 'playdough': True 'toothpicks': True 'vertices': True</pre>      | <pre>Dependencies: 'Contains(cube, edges)': True 'Contains(cube, vertices)': True 'Requires(cube, playdough)': True 'Requires(cube, toothpicks)': True</pre>     | 1.00  | 53       | 1.00        | 1.00 |
| HiDream-11-full  |                 |                  |                               | <pre>Entities: 'cube': True 'edges': True 'playdough': True 'toothpicks': True 'vertices': True</pre>      | <pre>Dependencies: 'Contains(cube, edges)': True 'Contains(cube, vertices)': True 'Requires(cube, playdough)': True 'Requires(cube, toothpicks)': False</pre>    | 0.94  | 34       | 1.00        | 0.94 |
| FLUX1-[pro]      |                 |                  |                               | <pre>Entities: 'cube': True 'edges': True 'playdough': True 'toothpicks': True 'vertices': False</pre>     | <pre>Dependencies: 'Contains(cube, edges)': False 'Contains(cube, vertices)': False 'Requires(cube, playdough)': False 'Requires(cube, toothpicks)': False</pre> | 0.62  | 29       | 1.00        | 0.62 |
| Ideogram V2      |                 |                  |                               | <pre>Entities: 'cube': False 'edges': True 'playdough': True 'toothpicks': True 'vertices': True</pre>     | <pre>Dependencies: 'Contains(cube, edges)': False 'Contains(cube, vertices)': False 'Requires(cube, playdough)': False 'Requires(cube, toothpicks)': False</pre> | 0.62  | 102      | 0.64        | 0.40 |
| Infinity-8B      |                 |                  |                               | <pre>Entities: 'cube': False 'edges': False 'playdough': True 'toothpicks': True 'vertices': False</pre>   | <pre>Dependencies: 'Contains(cube, edges)': False 'Contains(cube, vertices)': False 'Requires(cube, playdough)': False 'Requires(cube, toothpicks)': False</pre> | 0.36  | 81       | 0.88        | 0.32 |
| Seed-X           |                 |                  |                               | <pre>Entities: 'cube': False 'edges': False 'playdough': False 'toothpicks': False 'vertices': False</pre> | <pre>Dependencies: 'Contains(cube, edges)': False 'Contains(cube, vertices)': False 'Requires(cube, playdough)': False 'Requires(cube, toothpicks)': False</pre> | 0.00  | 44       | 1.00        | 0.00 |

Figure 14: MMMG Benchmark visualization for seven representative models on a Primaryschool-Mathematics example. Each row corresponds to one model and, from left to right, displays the generated image, its segmentation map, the reconstructed knowledge graph, the extracted entity and dependency lists, and finally the overall MMMG-Score along with its component sub-scores.

## F.2.4 Engineering

Question: Visualize an educational poster demonstrating the interaction between permanent magnets and a steel bar, highlighting forces, alignments, and magnetic field representations.

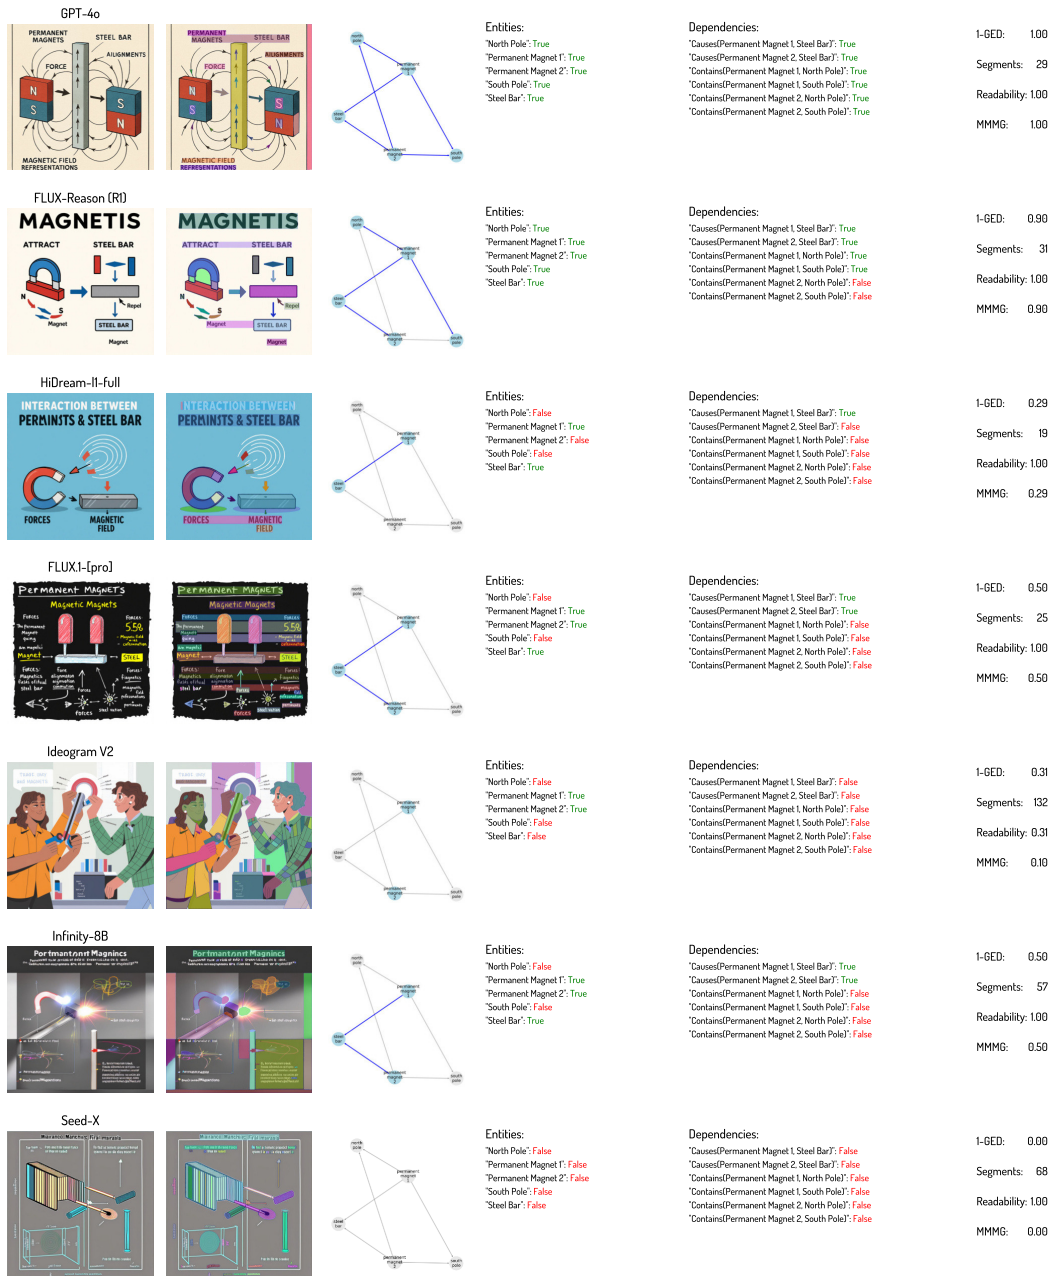

Figure 15: MMMG Benchmark visualization for seven representative models on a Primaryschool-Engineering example. Each row corresponds to one model and, from left to right, displays the generated image, its segmentation map, the reconstructed knowledge graph, the extracted entity and dependency lists, and finally the overall MMMG-Score along with its component sub-scores.

## F.2.5 Geography

Question: Visualize the processes of weathering, erosion, and deposition in a cohesive manner.

| Model            | Image | Segmentation Map | Knowledge Graph | Entities                                                                                                          | Dependencies                                                                                                                       | 1-GED | Segments | Readability | MMMG |
|------------------|-------|------------------|-----------------|-------------------------------------------------------------------------------------------------------------------|------------------------------------------------------------------------------------------------------------------------------------|-------|----------|-------------|------|
| GPT-4o           |       |                  |                 | Entities:<br>"Deposition": True<br>"Erosion": True<br>"Sediment": True<br>"Water": True<br>"Weathering": True     | Dependencies:<br>"Causes(Erosion, Deposition)": True<br>"Causes(Weathering, Erosion)": False<br>"Requires(Erosion, Water)": True   | 0.93  | 64       | 1.00        | 0.93 |
| FLUX-Reason (R1) |       |                  |                 | Entities:<br>"Deposition": True<br>"Erosion": True<br>"Sediment": False<br>"Water": True<br>"Weathering": True    | Dependencies:<br>"Causes(Erosion, Deposition)": True<br>"Causes(Weathering, Erosion)": False<br>"Requires(Erosion, Water)": False  | 0.86  | 56       | 1.00        | 0.86 |
| HiDream-11-full  |       |                  |                 | Entities:<br>"Deposition": False<br>"Erosion": True<br>"Sediment": True<br>"Water": True<br>"Weathering": False   | Dependencies:<br>"Causes(Erosion, Deposition)": False<br>"Causes(Weathering, Erosion)": False<br>"Requires(Erosion, Water)": False | 0.55  | 92       | 0.76        | 0.41 |
| FLUX1-[pro]      |       |                  |                 | Entities:<br>"Deposition": True<br>"Erosion": False<br>"Sediment": True<br>"Water": True<br>"Weathering": True    | Dependencies:<br>"Causes(Erosion, Deposition)": False<br>"Causes(Weathering, Erosion)": False<br>"Requires(Erosion, Water)": False | 0.67  | 58       | 1.00        | 0.67 |
| Ideogram V2      |       |                  |                 | Entities:<br>"Deposition": False<br>"Erosion": True<br>"Sediment": False<br>"Water": True<br>"Weathering": False  | Dependencies:<br>"Causes(Erosion, Deposition)": False<br>"Causes(Weathering, Erosion)": False<br>"Requires(Erosion, Water)": True  | 0.55  | 53       | 1.00        | 0.55 |
| Infinity-8B      |       |                  |                 | Entities:<br>"Deposition": True<br>"Erosion": True<br>"Sediment": True<br>"Water": True<br>"Weathering": True     | Dependencies:<br>"Causes(Erosion, Deposition)": True<br>"Causes(Weathering, Erosion)": False<br>"Requires(Erosion, Water)": True   | 0.93  | 61       | 1.00        | 0.93 |
| Seed-X           |       |                  |                 | Entities:<br>"Deposition": False<br>"Erosion": True<br>"Sediment": False<br>"Water": False<br>"Weathering": False | Dependencies:<br>"Causes(Erosion, Deposition)": False<br>"Causes(Weathering, Erosion)": False<br>"Requires(Erosion, Water)": False | 0.00  | 24       | 1.00        | 0.00 |

Figure 16: MMMG Benchmark visualization for seven representative models on a Primaryschool-Geography example. Each row corresponds to one model and, from left to right, displays the generated image, its segmentation map, the reconstructed knowledge graph, the extracted entity and dependency lists, and finally the overall MMMG-Score along with its component sub-scores.

## F.2.6 Economics

Question: Visualize an infographic illustrating the concepts of saving and spending in a comparative manner.

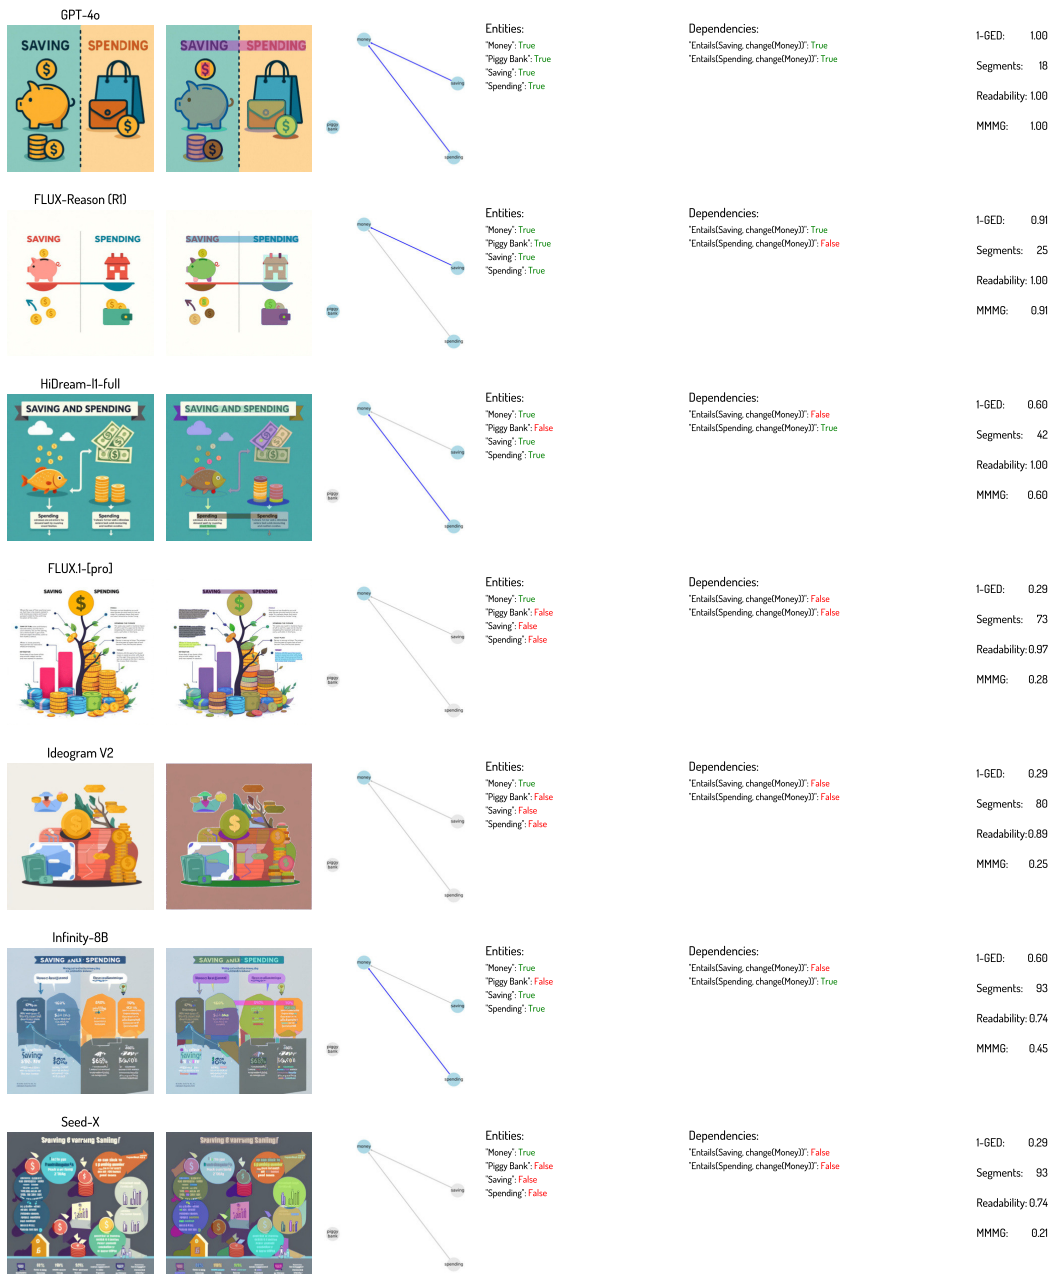

Figure 17: MMMG Benchmark visualization for seven representative models on a Primarschool-Economics example. Each row corresponds to one model and, from left to right, displays the generated image, its segmentation map, the reconstructed knowledge graph, the extracted entity and dependency lists, and finally the overall MMMG-Score along with its component sub-scores.

## F.2.7 Sociology

Question: Visualize an educational poster outlining the differences between nuclear and extended families.

| Model            | Generated Image | Segmentation Map | Reconstructed Knowledge Graph | Entities                                                                                           | Dependencies                                                                                                                                                                                    | 1-GED | Segments | Readability | MMMG |
|------------------|-----------------|------------------|-------------------------------|----------------------------------------------------------------------------------------------------|-------------------------------------------------------------------------------------------------------------------------------------------------------------------------------------------------|-------|----------|-------------|------|
| GPT-4o           |                 |                  |                               | Entities:<br>'adult': True<br>'child': True<br>'extended family': True<br>'nuclear family': True   | Dependencies:<br>'Contains(extended family, adult)': True<br>'Contains(extended family, child)': True<br>'Contains(nuclear family, adult)': True<br>'Contains(nuclear family, child)': True     | 1.00  | 36       | 1.00        | 1.00 |
| FLUX-Reason (R1) |                 |                  |                               | Entities:<br>'adult': True<br>'child': True<br>'extended family': True<br>'nuclear family': True   | Dependencies:<br>'Contains(extended family, adult)': True<br>'Contains(extended family, child)': True<br>'Contains(nuclear family, adult)': True<br>'Contains(nuclear family, child)': True     | 1.00  | 102      | 0.64        | 0.64 |
| HiDream-11-full  |                 |                  |                               | Entities:<br>'adult': True<br>'child': True<br>'extended family': True<br>'nuclear family': True   | Dependencies:<br>'Contains(extended family, adult)': True<br>'Contains(extended family, child)': True<br>'Contains(nuclear family, adult)': True<br>'Contains(nuclear family, child)': True     | 1.00  | 86       | 0.82        | 0.82 |
| FLUX1-[pro]      |                 |                  |                               | Entities:<br>'adult': True<br>'child': True<br>'extended family': False<br>'nuclear family': False | Dependencies:<br>'Contains(extended family, adult)': False<br>'Contains(extended family, child)': False<br>'Contains(nuclear family, adult)': False<br>'Contains(nuclear family, child)': False | 0.40  | 36       | 1.00        | 0.40 |
| Ideogram V2      |                 |                  |                               | Entities:<br>'adult': True<br>'child': True<br>'extended family': False<br>'nuclear family': True  | Dependencies:<br>'Contains(extended family, adult)': False<br>'Contains(extended family, child)': False<br>'Contains(nuclear family, adult)': True<br>'Contains(nuclear family, child)': True   | 0.46  | 173      | 0.00        | 0.00 |
| Infinity-8B      |                 |                  |                               | Entities:<br>'adult': True<br>'child': True<br>'extended family': True<br>'nuclear family': True   | Dependencies:<br>'Contains(extended family, adult)': True<br>'Contains(extended family, child)': True<br>'Contains(nuclear family, adult)': True<br>'Contains(nuclear family, child)': True     | 1.00  | 109      | 0.57        | 0.57 |
| Seed-X           |                 |                  |                               | Entities:<br>'adult': True<br>'child': True<br>'extended family': False<br>'nuclear family': True  | Dependencies:<br>'Contains(extended family, adult)': False<br>'Contains(extended family, child)': False<br>'Contains(nuclear family, adult)': True<br>'Contains(nuclear family, child)': True   | 0.46  | 68       | 1.00        | 0.46 |

Figure 18: MMMG Benchmark visualization for seven representative models on a Primaryschool-Sociology example. Each row corresponds to one model and, from left to right, displays the generated image, its segmentation map, the reconstructed knowledge graph, the extracted entity and dependency lists, and finally the overall MMMG-Score along with its component sub-scores.

## F.2.8 History

Question: Visualize the contrasting concepts of Freedom and Slavery in a historical context through an educational poster.

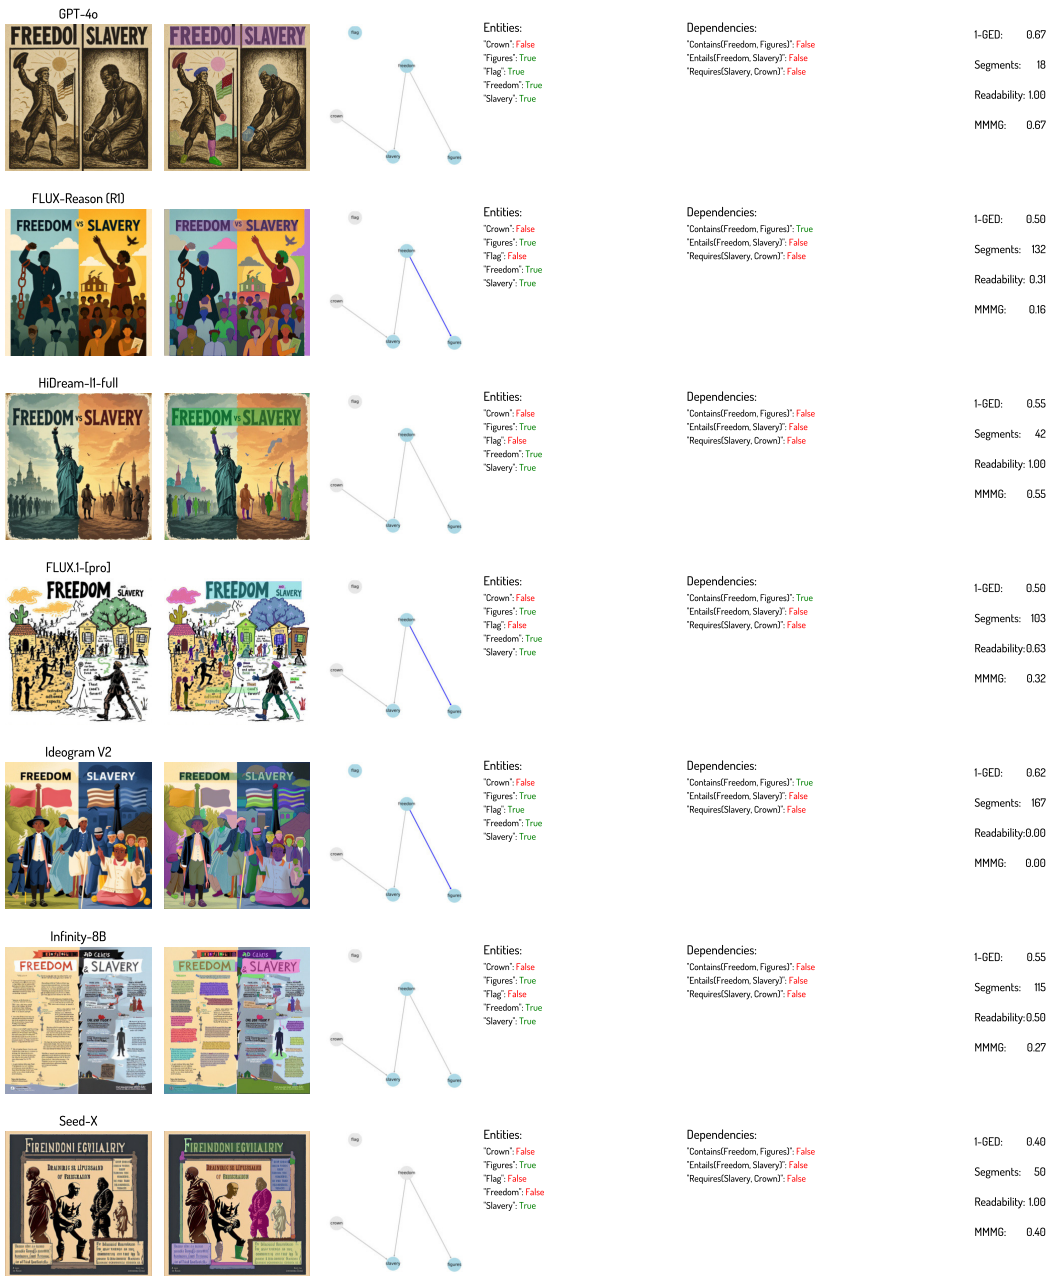

Figure 19: MMMG Benchmark visualization for seven representative models on a Primaryschool-History example. Each row corresponds to one model and, from left to right, displays the generated image, its segmentation map, the reconstructed knowledge graph, the extracted entity and dependency lists, and finally the overall MMMG-Score along with its component sub-scores.

## F.2.9 Philosophy

Question: Visualize a diagram that depicts the concept of "community," illustrating different roles people play in it.

|                                                                                                                            |                                                                                     |                                                                                     |                                                                                                                                                                                                              |                                                                                                                                                                                                                                                                                           |                                                                                                      |
|----------------------------------------------------------------------------------------------------------------------------|-------------------------------------------------------------------------------------|-------------------------------------------------------------------------------------|--------------------------------------------------------------------------------------------------------------------------------------------------------------------------------------------------------------|-------------------------------------------------------------------------------------------------------------------------------------------------------------------------------------------------------------------------------------------------------------------------------------------|------------------------------------------------------------------------------------------------------|
| <p>GPT-4o</p>                             |    |    | <p>Entities:<br/>         'community': True<br/>         'diversity': True<br/>         'individuals': True<br/>         'interactions': False<br/>         'roles': True<br/>         'support': False</p>  | <p>Dependencies:<br/>         'causes(interactions, support)': False<br/>         'contains(community, diversity)': True<br/>         'contains(community, individuals)': True<br/>         'defines(individuals, roles)': True<br/>         'requires(roles, interactions)': False</p>   | <p>1-GED: 0.60<br/>         Segments: 26<br/>         Readability: 1.00<br/>         MMMG: 0.60</p>  |
| <p>FLUX-Reason (R0)</p> <p>Community</p>  |    |    | <p>Entities:<br/>         'community': True<br/>         'diversity': True<br/>         'individuals': True<br/>         'interactions': False<br/>         'roles': True<br/>         'support': False</p>  | <p>Dependencies:<br/>         'causes(interactions, support)': False<br/>         'contains(community, diversity)': True<br/>         'contains(community, individuals)': True<br/>         'defines(individuals, roles)': True<br/>         'requires(roles, interactions)': False</p>   | <p>1-GED: 0.60<br/>         Segments: 67<br/>         Readability: 1.00<br/>         MMMG: 0.60</p>  |
| <p>HiDream-11-full</p> <p>COMMUNITY</p>   |    |    | <p>Entities:<br/>         'community': True<br/>         'diversity': True<br/>         'individuals': True<br/>         'interactions': False<br/>         'roles': False<br/>         'support': False</p> | <p>Dependencies:<br/>         'causes(interactions, support)': False<br/>         'contains(community, diversity)': True<br/>         'contains(community, individuals)': True<br/>         'defines(individuals, roles)': False<br/>         'requires(roles, interactions)': False</p>  | <p>1-GED: 0.47<br/>         Segments: 27<br/>         Readability: 1.00<br/>         MMMG: 0.47</p>  |
| <p>FLUX1-[pro]</p>                       |   |   | <p>Entities:<br/>         'community': True<br/>         'diversity': False<br/>         'individuals': True<br/>         'interactions': False<br/>         'roles': True<br/>         'support': False</p> | <p>Dependencies:<br/>         'causes(interactions, support)': False<br/>         'contains(community, diversity)': False<br/>         'contains(community, individuals)': True<br/>         'defines(individuals, roles)': False<br/>         'requires(roles, interactions)': False</p> | <p>1-GED: 0.38<br/>         Segments: 24<br/>         Readability: 1.00<br/>         MMMG: 0.38</p>  |
| <p>Ideogram V2</p> <p>COMMUNITY</p>     |  |  | <p>Entities:<br/>         'community': True<br/>         'diversity': True<br/>         'individuals': True<br/>         'interactions': True<br/>         'roles': True<br/>         'support': False</p>   | <p>Dependencies:<br/>         'causes(interactions, support)': False<br/>         'contains(community, diversity)': True<br/>         'contains(community, individuals)': True<br/>         'defines(individuals, roles)': False<br/>         'requires(roles, interactions)': False</p>  | <p>1-GED: 0.53<br/>         Segments: 120<br/>         Readability: 0.44<br/>         MMMG: 0.23</p> |
| <p>Infinity-8B</p>                      |  |  | <p>Entities:<br/>         'community': True<br/>         'diversity': True<br/>         'individuals': True<br/>         'interactions': True<br/>         'roles': False<br/>         'support': True</p>   | <p>Dependencies:<br/>         'causes(interactions, support)': False<br/>         'contains(community, diversity)': False<br/>         'contains(community, individuals)': True<br/>         'defines(individuals, roles)': False<br/>         'requires(roles, interactions)': False</p> | <p>1-GED: 0.59<br/>         Segments: 109<br/>         Readability: 0.57<br/>         MMMG: 0.33</p> |
| <p>Seed-X</p>                           |  |  | <p>Entities:<br/>         'community': True<br/>         'diversity': True<br/>         'individuals': True<br/>         'interactions': True<br/>         'roles': False<br/>         'support': False</p>  | <p>Dependencies:<br/>         'causes(interactions, support)': False<br/>         'contains(community, diversity)': True<br/>         'contains(community, individuals)': True<br/>         'defines(individuals, roles)': False<br/>         'requires(roles, interactions)': False</p>  | <p>1-GED: 0.44<br/>         Segments: 67<br/>         Readability: 1.00<br/>         MMMG: 0.44</p>  |

Figure 20: MMMG Benchmark visualization for seven representative models on a Primaryschool-Philosophy example. Each row corresponds to one model and, from left to right, displays the generated image, its segmentation map, the reconstructed knowledge graph, the extracted entity and dependency lists, and finally the overall MMMG-Score along with its component sub-scores.

## F.2.10 Literature

Question: Design a poster that teaches kids how to write a simple story, incorporating steps and illustrations.

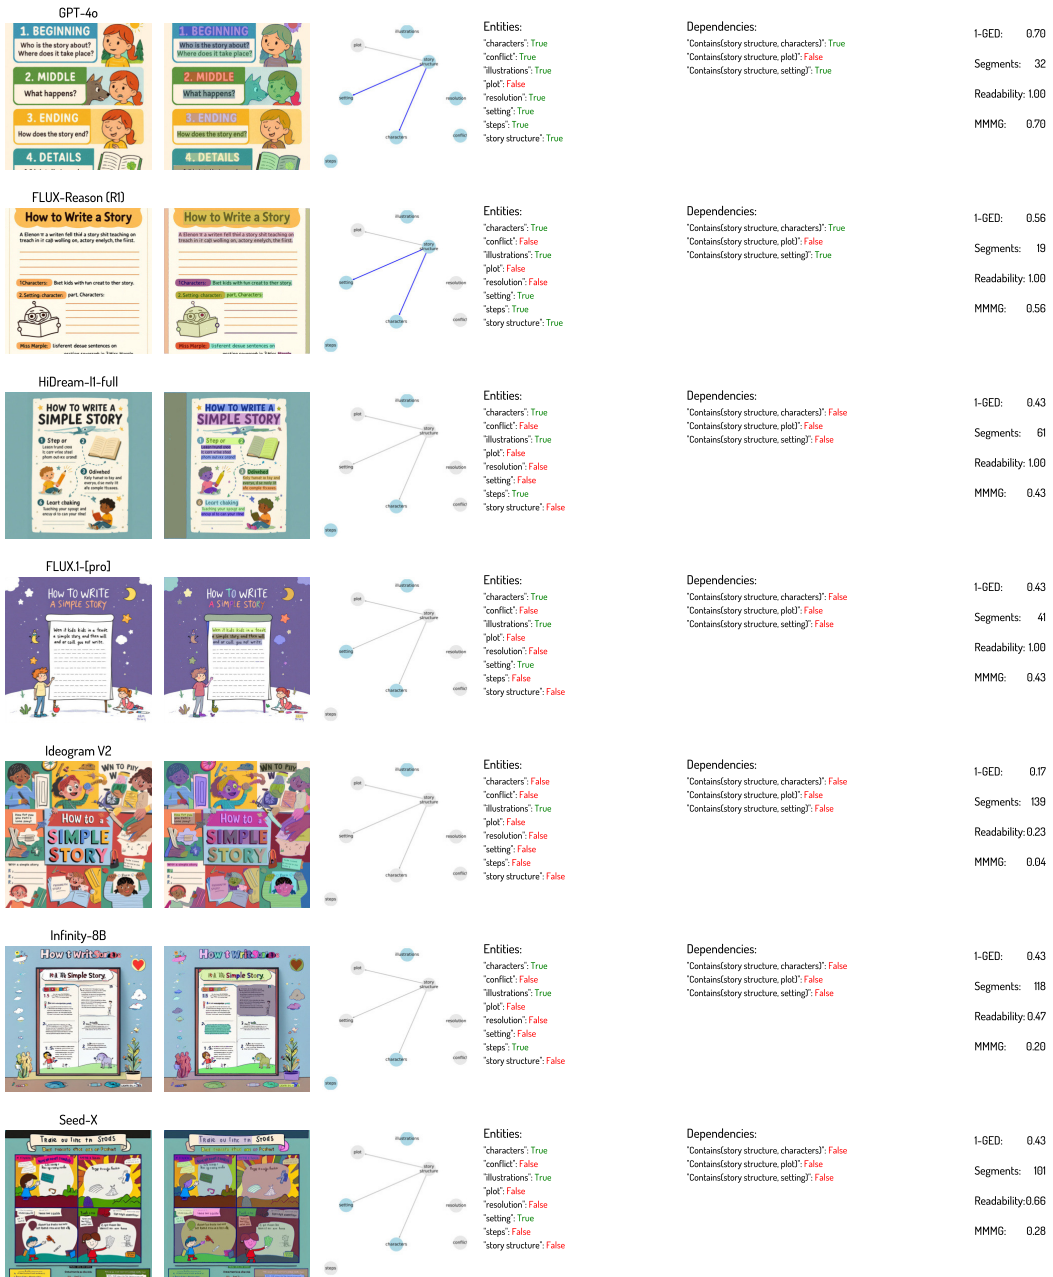

Figure 21: MMMG Benchmark visualization for seven representative models on a Primaryschool-Literature example. Each row corresponds to one model and, from left to right, displays the generated image, its segmentation map, the reconstructed knowledge graph, the extracted entity and dependency lists, and finally the overall MMMG-Score along with its component sub-scores.

## F.3 Secondary School

### F.3.1 Biology

Question: Visualize an infographic illustrating the four main types of biomolecules and their structures.

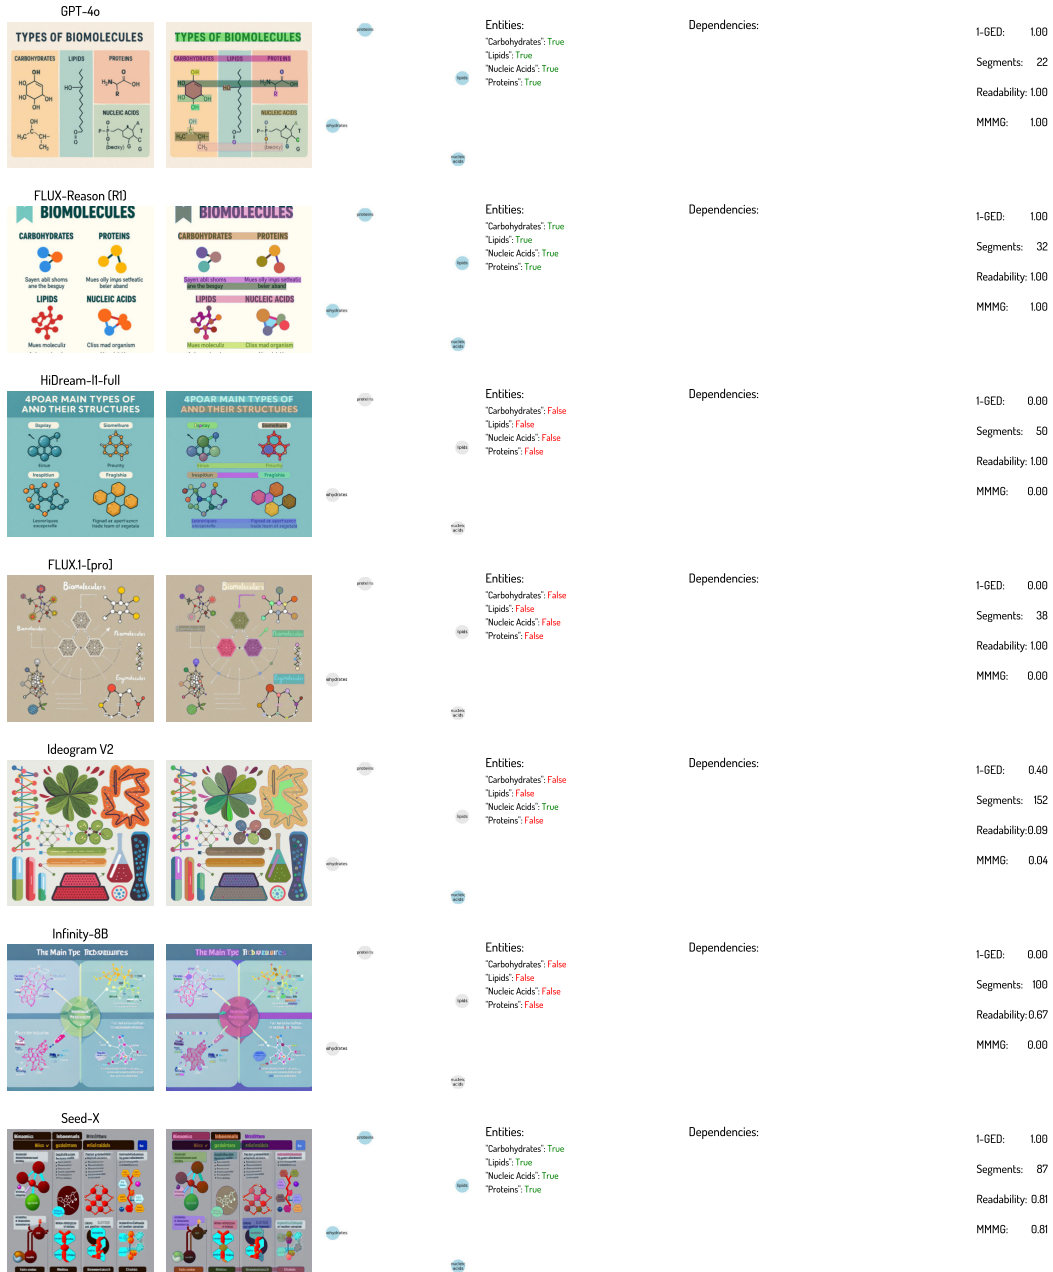

Figure 22: MMMG Benchmark visualization for seven representative models on a Secondaryschool-Biology example. Each row corresponds to one model and, from left to right, displays the generated image, its segmentation map, the reconstructed knowledge graph, the extracted entity and dependency lists, and finally the overall MMMG-Score along with its component sub-scores.

### F.3.2 Chemistry

Question: Visualize the states of matter and their molecular arrangements in an educational poster.

| Model            | Generated Image | Segmentation Map | Reconstructed Knowledge Graph | Entities                                                                           | Dependencies                                                                                                                                                                                                  | 1-GED | Segments | Readability | MMMG |
|------------------|-----------------|------------------|-------------------------------|------------------------------------------------------------------------------------|---------------------------------------------------------------------------------------------------------------------------------------------------------------------------------------------------------------|-------|----------|-------------|------|
| GPT-4o           |                 |                  |                               | <pre>Entities: 'gas': True 'liquid': True 'particles': True 'solid': True</pre>    | <pre>Dependencies: 'Contains(gas, particles)': True 'Contains(liquid, particles)': True 'Contains(solid, particles)': True 'TemporalOrder(liquid, gas)': False 'TemporalOrder(solid, liquid)': False</pre>    | 0.88  | 55       | 1.00        | 0.88 |
| FLUX-Reason (R1) |                 |                  |                               | <pre>Entities: 'gas': True 'liquid': True 'particles': True 'solid': True</pre>    | <pre>Dependencies: 'Contains(gas, particles)': False 'Contains(liquid, particles)': False 'Contains(solid, particles)': True 'TemporalOrder(liquid, gas)': False 'TemporalOrder(solid, liquid)': False</pre>  | 0.71  | 53       | 1.00        | 0.71 |
| HiDream-11-full  |                 |                  |                               | <pre>Entities: 'gas': False 'liquid': False 'particles': True 'solid': False</pre> | <pre>Dependencies: 'Contains(gas, particles)': False 'Contains(liquid, particles)': False 'Contains(solid, particles)': False 'TemporalOrder(liquid, gas)': False 'TemporalOrder(solid, liquid)': False</pre> | 0.20  | 83       | 0.86        | 0.17 |
| FLUX1-[pro]      |                 |                  |                               | <pre>Entities: 'gas': False 'liquid': False 'particles': True 'solid': False</pre> | <pre>Dependencies: 'Contains(gas, particles)': False 'Contains(liquid, particles)': False 'Contains(solid, particles)': True 'TemporalOrder(liquid, gas)': False 'TemporalOrder(solid, liquid)': False</pre>  | 0.20  | 178      | 0.00        | 0.00 |
| Ideogram V2      |                 |                  |                               | <pre>Entities: 'gas': False 'liquid': True 'particles': True 'solid': False</pre>  | <pre>Dependencies: 'Contains(gas, particles)': False 'Contains(liquid, particles)': True 'Contains(solid, particles)': True 'TemporalOrder(liquid, gas)': False 'TemporalOrder(solid, liquid)': False</pre>   | 0.33  | 102      | 0.64        | 0.21 |
| Infinity-8B      |                 |                  |                               | <pre>Entities: 'gas': False 'liquid': False 'particles': True 'solid': False</pre> | <pre>Dependencies: 'Contains(gas, particles)': False 'Contains(liquid, particles)': False 'Contains(solid, particles)': True 'TemporalOrder(liquid, gas)': False 'TemporalOrder(solid, liquid)': False</pre>  | 0.20  | 162      | 0.00        | 0.00 |
| Seed-X           |                 |                  |                               | <pre>Entities: 'gas': True 'liquid': True 'particles': True 'solid': True</pre>    | <pre>Dependencies: 'Contains(gas, particles)': True 'Contains(liquid, particles)': True 'Contains(solid, particles)': True 'TemporalOrder(liquid, gas)': False 'TemporalOrder(solid, liquid)': False</pre>    | 0.88  | 130      | 0.33        | 0.29 |

Figure 23: MMMG Benchmark visualization for seven representative models on a Secondaryschool-Chemistry example. Each row corresponds to one model and, from left to right, displays the generated image, its segmentation map, the reconstructed knowledge graph, the extracted entity and dependency lists, and finally the overall MMMG-Score along with its component sub-scores.

### F.3.3 Mathematics

Question: Create a diagram explaining the difference between rational and irrational numbers, including examples and visual representations.

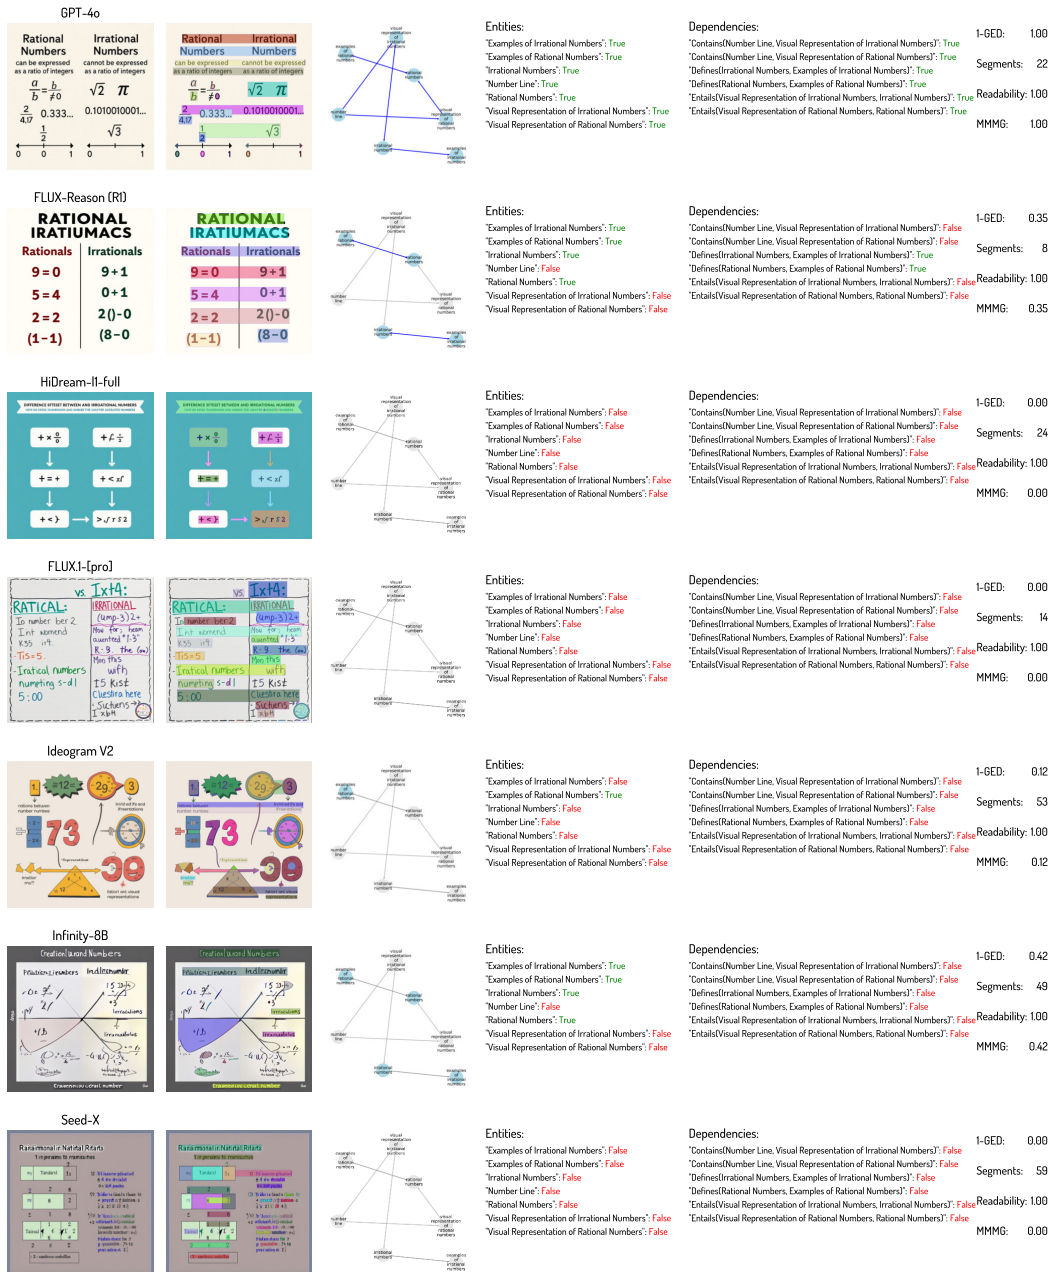

Figure 24: MMMG Benchmark visualization for seven representative models on a Secondaryschool-Mathematics example. Each row corresponds to one model and, from left to right, displays the generated image, its segmentation map, the reconstructed knowledge graph, the extracted entity and dependency lists, and finally the overall MMMG-Score along with its component sub-scores.

### F.3.4 Engineering

Question: Visualize an infographic illustrating how a concave lens transforms parallel light into diverging light.

| Model            | Generated Image | Segmentation Map | Reconstructed Knowledge Graph | Entities                                                                                  | Dependencies                                                                                                   | 1-GED       | Segments     | Readability      | MMMG       |
|------------------|-----------------|------------------|-------------------------------|-------------------------------------------------------------------------------------------|----------------------------------------------------------------------------------------------------------------|-------------|--------------|------------------|------------|
| GPT-4o           |                 |                  |                               | Entities:<br>'Concave Lens': True<br>'Diverging Light': True<br>'Parallel Light': True    | Dependencies:<br>'CausesConcave Lens, Diverging Light': True<br>'ContainsConcave Lens, Parallel Light': True   | 1-GED: 100  | Segments: 14 | Readability: 100 | MMMG: 100  |
| FLUX-Reason (R1) |                 |                  |                               | Entities:<br>'Concave Lens': True<br>'Diverging Light': True<br>'Parallel Light': False   | Dependencies:<br>'CausesConcave Lens, Diverging Light': False<br>'ContainsConcave Lens, Parallel Light': False | 1-GED: 0.57 | Segments: 25 | Readability: 100 | MMMG: 0.57 |
| HiDream-11-full  |                 |                  |                               | Entities:<br>'Concave Lens': False<br>'Diverging Light': True<br>'Parallel Light': False  | Dependencies:<br>'CausesConcave Lens, Diverging Light': False<br>'ContainsConcave Lens, Parallel Light': False | 1-GED: 0.33 | Segments: 29 | Readability: 100 | MMMG: 0.33 |
| FLUX1-[pro]      |                 |                  |                               | Entities:<br>'Concave Lens': False<br>'Diverging Light': False<br>'Parallel Light': False | Dependencies:<br>'CausesConcave Lens, Diverging Light': False<br>'ContainsConcave Lens, Parallel Light': False | 1-GED: 0.00 | Segments: 12 | Readability: 100 | MMMG: 0.00 |
| Ideogram V2      |                 |                  |                               | Entities:<br>'Concave Lens': False<br>'Diverging Light': True<br>'Parallel Light': False  | Dependencies:<br>'CausesConcave Lens, Diverging Light': False<br>'ContainsConcave Lens, Parallel Light': False | 1-GED: 0.33 | Segments: 4  | Readability: 100 | MMMG: 0.33 |
| Infinity-8B      |                 |                  |                               | Entities:<br>'Concave Lens': True<br>'Diverging Light': True<br>'Parallel Light': True    | Dependencies:<br>'CausesConcave Lens, Diverging Light': True<br>'ContainsConcave Lens, Parallel Light': False  | 1-GED: 0.89 | Segments: 60 | Readability: 100 | MMMG: 0.89 |
| Seed-X           |                 |                  |                               | Entities:<br>'Concave Lens': True<br>'Diverging Light': True<br>'Parallel Light': True    | Dependencies:<br>'CausesConcave Lens, Diverging Light': True<br>'ContainsConcave Lens, Parallel Light': True   | 1-GED: 100  | Segments: 69 | Readability: 100 | MMMG: 100  |

Figure 25: MMMG Benchmark visualization for seven representative models on a Secondaryschool-Engineering example. Each row corresponds to one model and, from left to right, displays the generated image, its segmentation map, the reconstructed knowledge graph, the extracted entity and dependency lists, and finally the overall MMMG-Score along with its component sub-scores.

### F.3.5 Geography

Question: Visualize an infographic comparing the ecosystems of the Arctic and Antarctic, focusing on flora and fauna.

| Model            | Generated Image                                                                     | Segmentation Map                                                                    | Reconstructed Knowledge Graph                                                       | Entities                                                                                                                                                                                                                                    | Dependencies                                                                                                                                                                                                                                                                                                                                                         | 1-GED | Segments | Readability | MMMG |
|------------------|-------------------------------------------------------------------------------------|-------------------------------------------------------------------------------------|-------------------------------------------------------------------------------------|---------------------------------------------------------------------------------------------------------------------------------------------------------------------------------------------------------------------------------------------|----------------------------------------------------------------------------------------------------------------------------------------------------------------------------------------------------------------------------------------------------------------------------------------------------------------------------------------------------------------------|-------|----------|-------------|------|
| GPT-4o           |    |    |    | Entities:<br>"Antarctic ecosystem": True<br>"Arctic ecosystem": True<br>"Fauna": True<br>"Flora": True<br>"Icebergs": False<br>"krill": False<br>"penguins": True<br>"polar bears": False<br>"seals": True<br>"tundra vegetation": False    | Dependencies:<br>"Contains(Antarctic ecosystem, fauna)": True<br>"Contains(Antarctic ecosystem, flora)": True<br>"Contains(Arctic ecosystem, fauna)": True<br>"Contains(Arctic ecosystem, flora)": True<br>"Contains(Arctic ecosystem, icebergs)": False<br>"Requires(Antarctic ecosystem, penguins)": False<br>"Requires(Arctic ecosystem, polar bears)": False     | 0.59  | 34       | 100         | 0.59 |
| FLUX-Reason (R1) |    |    |    | Entities:<br>"Antarctic ecosystem": True<br>"Arctic ecosystem": True<br>"Fauna": True<br>"Flora": False<br>"Icebergs": False<br>"krill": True<br>"penguins": True<br>"polar bears": True<br>"seals": True<br>"tundra vegetation": False     | Dependencies:<br>"Contains(Antarctic ecosystem, fauna)": False<br>"Contains(Antarctic ecosystem, flora)": False<br>"Contains(Arctic ecosystem, fauna)": False<br>"Contains(Arctic ecosystem, flora)": False<br>"Contains(Arctic ecosystem, icebergs)": False<br>"Requires(Antarctic ecosystem, penguins)": False<br>"Requires(Arctic ecosystem, polar bears)": True  | 0.56  | 45       | 100         | 0.56 |
| HiDream-11-full  |    |    |    | Entities:<br>"Antarctic ecosystem": True<br>"Arctic ecosystem": True<br>"Fauna": True<br>"Flora": True<br>"Icebergs": True<br>"krill": False<br>"penguins": False<br>"polar bears": False<br>"seals": True<br>"tundra vegetation": False    | Dependencies:<br>"Contains(Antarctic ecosystem, fauna)": True<br>"Contains(Antarctic ecosystem, flora)": False<br>"Contains(Arctic ecosystem, fauna)": True<br>"Contains(Arctic ecosystem, flora)": True<br>"Contains(Arctic ecosystem, icebergs)": True<br>"Requires(Antarctic ecosystem, penguins)": False<br>"Requires(Arctic ecosystem, polar bears)": False     | 0.52  | 78       | 0.91        | 0.47 |
| FLUX1-[pro]      |   |   |   | Entities:<br>"Antarctic ecosystem": False<br>"Arctic ecosystem": False<br>"Fauna": True<br>"Flora": True<br>"Icebergs": False<br>"krill": False<br>"penguins": True<br>"polar bears": False<br>"seals": False<br>"tundra vegetation": False | Dependencies:<br>"Contains(Antarctic ecosystem, fauna)": False<br>"Contains(Antarctic ecosystem, flora)": False<br>"Contains(Arctic ecosystem, fauna)": False<br>"Contains(Arctic ecosystem, flora)": False<br>"Contains(Arctic ecosystem, icebergs)": False<br>"Requires(Antarctic ecosystem, penguins)": False<br>"Requires(Arctic ecosystem, polar bears)": False | 0.30  | 88       | 0.80        | 0.24 |
| Ideogram V2      |  |  |  | Entities:<br>"Antarctic ecosystem": False<br>"Arctic ecosystem": True<br>"Fauna": True<br>"Flora": True<br>"Icebergs": True<br>"krill": False<br>"penguins": False<br>"polar bears": False<br>"seals": False<br>"tundra vegetation": True   | Dependencies:<br>"Contains(Antarctic ecosystem, fauna)": False<br>"Contains(Antarctic ecosystem, flora)": True<br>"Contains(Arctic ecosystem, fauna)": True<br>"Contains(Arctic ecosystem, flora)": True<br>"Contains(Arctic ecosystem, icebergs)": True<br>"Requires(Antarctic ecosystem, penguins)": False<br>"Requires(Arctic ecosystem, polar bears)": False     | 0.48  | 170      | 0.00        | 0.00 |
| Infinity-8B      |  |  |  | Entities:<br>"Antarctic ecosystem": True<br>"Arctic ecosystem": True<br>"Fauna": True<br>"Flora": True<br>"Icebergs": True<br>"krill": False<br>"penguins": True<br>"polar bears": False<br>"seals": False<br>"tundra vegetation": True     | Dependencies:<br>"Contains(Antarctic ecosystem, fauna)": True<br>"Contains(Antarctic ecosystem, flora)": True<br>"Contains(Arctic ecosystem, fauna)": True<br>"Contains(Arctic ecosystem, flora)": True<br>"Contains(Arctic ecosystem, icebergs)": True<br>"Requires(Antarctic ecosystem, penguins)": True<br>"Requires(Arctic ecosystem, polar bears)": False       | 0.62  | 223      | 0.00        | 0.00 |
| Seed-X           |  |  |  | Entities:<br>"Antarctic ecosystem": True<br>"Arctic ecosystem": True<br>"Fauna": True<br>"Flora": True<br>"Icebergs": True<br>"krill": False<br>"penguins": True<br>"polar bears": True<br>"seals": True<br>"tundra vegetation": True       | Dependencies:<br>"Contains(Antarctic ecosystem, fauna)": False<br>"Contains(Antarctic ecosystem, flora)": False<br>"Contains(Arctic ecosystem, fauna)": True<br>"Contains(Arctic ecosystem, flora)": True<br>"Contains(Arctic ecosystem, icebergs)": False<br>"Requires(Antarctic ecosystem, penguins)": False<br>"Requires(Arctic ecosystem, polar bears)": False   | 0.69  | 89       | 0.79        | 0.55 |

Figure 26: MMMG Benchmark visualization for seven representative models on a Secondaryschool-Geography example. Each row corresponds to one model and, from left to right, displays the generated image, its segmentation map, the reconstructed knowledge graph, the extracted entity and dependency lists, and finally the overall MMMG-Score along with its component sub-scores.

### F.3.6 Economics

Question: Visualize an infographic highlighting the characteristics and differences between a seller's market and a buyer's market in real estate.

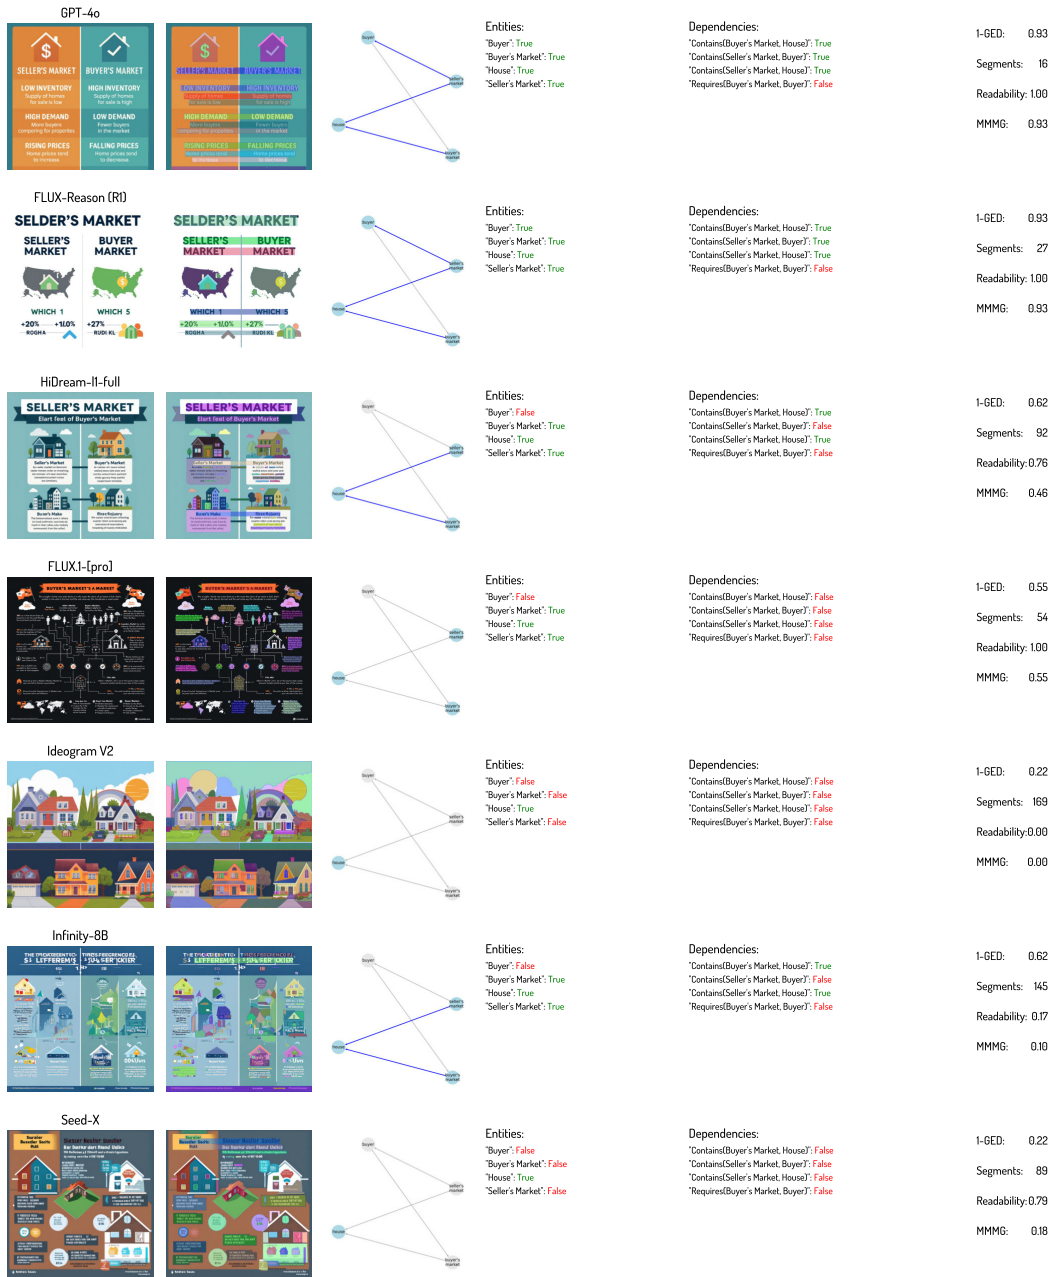

Figure 27: MMMG Benchmark visualization for seven representative models on a Secondaryschool-Economics example. Each row corresponds to one model and, from left to right, displays the generated image, its segmentation map, the reconstructed knowledge graph, the extracted entity and dependency lists, and finally the overall MMMG-Score along with its component sub-scores.

### F.3.7 Sociology

Question: Create an infographic comparing the concepts of cooperation and competition in social interactions.

| Model            | Generated Image | Segmentation Map | Reconstructed Knowledge Graph | Entities                                                                                                                                                                                                                                  | Dependencies                                                                                                                                                                                                                                                                                                                                                                                                                                                                                | 1-GED | Segments | Readability | MMMG |
|------------------|-----------------|------------------|-------------------------------|-------------------------------------------------------------------------------------------------------------------------------------------------------------------------------------------------------------------------------------------|---------------------------------------------------------------------------------------------------------------------------------------------------------------------------------------------------------------------------------------------------------------------------------------------------------------------------------------------------------------------------------------------------------------------------------------------------------------------------------------------|-------|----------|-------------|------|
| GPT-4o           |                 |                  |                               | Entities:<br>'benefits of cooperation': True<br>'competition': True<br>'cooperation': True<br>'drawbacks of competition': True<br>'examples of competition': True<br>'examples of cooperation': True<br>'social interactions': True       | Dependencies:<br>'Contains(competition, examples of competition)': True<br>'Contains(cooperation, examples of cooperation)': True<br>'Defines(competition, social interactions)': False<br>'Defines(cooperation, social interactions)': False<br>'Entails(competition, drawbacks of competition)': True<br>'Entails(cooperation, benefits of cooperation)': True<br>'Requires(benefits of cooperation, cooperation)': False<br>'Requires(drawbacks of competition, competition)': False     | 0.85  | 27       | 100         | 0.85 |
| FLUX-Reason (R1) |                 |                  |                               | Entities:<br>'benefits of cooperation': False<br>'competition': True<br>'cooperation': True<br>'drawbacks of competition': False<br>'examples of competition': True<br>'examples of cooperation': True<br>'social interactions': True     | Dependencies:<br>'Contains(competition, examples of competition)': True<br>'Contains(cooperation, examples of cooperation)': True<br>'Defines(competition, social interactions)': False<br>'Defines(cooperation, social interactions)': False<br>'Entails(competition, drawbacks of competition)': False<br>'Entails(cooperation, benefits of cooperation)': False<br>'Requires(benefits of cooperation, cooperation)': False<br>'Requires(drawbacks of competition, competition)': False   | 0.55  | 26       | 100         | 0.55 |
| HiDream-11-full  |                 |                  |                               | Entities:<br>'benefits of cooperation': False<br>'competition': True<br>'cooperation': True<br>'drawbacks of competition': False<br>'examples of competition': True<br>'examples of cooperation': True<br>'social interactions': True     | Dependencies:<br>'Contains(competition, examples of competition)': True<br>'Contains(cooperation, examples of cooperation)': True<br>'Defines(competition, social interactions)': False<br>'Defines(cooperation, social interactions)': False<br>'Entails(competition, drawbacks of competition)': False<br>'Entails(cooperation, benefits of cooperation)': False<br>'Requires(benefits of cooperation, cooperation)': False<br>'Requires(drawbacks of competition, competition)': False   | 0.55  | 62       | 100         | 0.55 |
| FLUX1-[pro]      |                 |                  |                               | Entities:<br>'benefits of cooperation': False<br>'competition': False<br>'cooperation': False<br>'drawbacks of competition': False<br>'examples of competition': False<br>'examples of cooperation': False<br>'social interactions': True | Dependencies:<br>'Contains(competition, examples of competition)': False<br>'Contains(cooperation, examples of cooperation)': False<br>'Defines(competition, social interactions)': False<br>'Defines(cooperation, social interactions)': False<br>'Entails(competition, drawbacks of competition)': False<br>'Entails(cooperation, benefits of cooperation)': False<br>'Requires(benefits of cooperation, cooperation)': False<br>'Requires(drawbacks of competition, competition)': False | 0.12  | 57       | 100         | 0.12 |
| Ideogram V2      |                 |                  |                               | Entities:<br>'benefits of cooperation': False<br>'competition': False<br>'cooperation': True<br>'drawbacks of competition': False<br>'examples of competition': False<br>'examples of cooperation': True<br>'social interactions': True   | Dependencies:<br>'Contains(competition, examples of competition)': False<br>'Contains(cooperation, examples of cooperation)': True<br>'Defines(competition, social interactions)': False<br>'Defines(cooperation, social interactions)': False<br>'Entails(competition, drawbacks of competition)': False<br>'Entails(cooperation, benefits of cooperation)': False<br>'Requires(benefits of cooperation, cooperation)': False<br>'Requires(drawbacks of competition, competition)': False  | 0.32  | 66       | 100         | 0.32 |
| Infinity-8B      |                 |                  |                               | Entities:<br>'benefits of cooperation': False<br>'competition': True<br>'cooperation': True<br>'drawbacks of competition': False<br>'examples of competition': True<br>'examples of cooperation': True<br>'social interactions': True     | Dependencies:<br>'Contains(competition, examples of competition)': True<br>'Contains(cooperation, examples of cooperation)': True<br>'Defines(competition, social interactions)': False<br>'Defines(cooperation, social interactions)': False<br>'Entails(competition, drawbacks of competition)': True<br>'Entails(cooperation, benefits of cooperation)': True<br>'Requires(benefits of cooperation, cooperation)': False<br>'Requires(drawbacks of competition, competition)': False     | 0.58  | 148      | 0.13        | 0.08 |
| Seed-X           |                 |                  |                               | Entities:<br>'benefits of cooperation': False<br>'competition': True<br>'cooperation': True<br>'drawbacks of competition': False<br>'examples of competition': False<br>'examples of cooperation': False<br>'social interactions': True   | Dependencies:<br>'Contains(competition, examples of competition)': False<br>'Contains(cooperation, examples of cooperation)': False<br>'Defines(competition, social interactions)': False<br>'Defines(cooperation, social interactions)': False<br>'Entails(competition, drawbacks of competition)': False<br>'Entails(cooperation, benefits of cooperation)': False<br>'Requires(benefits of cooperation, cooperation)': False<br>'Requires(drawbacks of competition, competition)': False | 0.33  | 110      | 0.56        | 0.19 |

Figure 28: MMMG Benchmark visualization for seven representative models on a Secondaryschool-Sociology example. Each row corresponds to one model and, from left to right, displays the generated image, its segmentation map, the reconstructed knowledge graph, the extracted entity and dependency lists, and finally the overall MMMG-Score along with its component sub-scores.

### F.3.8 History

Question: Visualize an infographic illustrating the pathways through which immigration leads to cultural adaptation in the United States, highlighting key concepts and hidden connections.

|                                                                                                           |                                                                                     |                                                                                     |                                                                                                                                                                                                                                                                               |                                                                                                                                                                                                                                                                                    |                                                                                    |
|-----------------------------------------------------------------------------------------------------------|-------------------------------------------------------------------------------------|-------------------------------------------------------------------------------------|-------------------------------------------------------------------------------------------------------------------------------------------------------------------------------------------------------------------------------------------------------------------------------|------------------------------------------------------------------------------------------------------------------------------------------------------------------------------------------------------------------------------------------------------------------------------------|------------------------------------------------------------------------------------|
| <p>GPT-4o</p>            |    |    | <p>Entities:</p> <ul style="list-style-type: none"> <li>'Adaptation': True</li> <li>'Culture': True</li> <li>'Customs and Traditions': False</li> <li>'Europe': False</li> <li>'Immigrants': True</li> <li>'New Language': True</li> <li>'United States': True</li> </ul>     | <p>Dependencies:</p> <ul style="list-style-type: none"> <li>'Causes(Immigrants, Adaptation)': True</li> <li>'Contains(Adaptation, Culture)': False</li> <li>'Requires(Adaptation, Customs and Traditions)': False</li> <li>'Requires(Adaptation, New Language)': False</li> </ul>  | <p>1-GED: 0.59</p> <p>Segments: 32</p> <p>Readability: 1.00</p> <p>MMMG: 0.59</p>  |
| <p>FLUX-Reason (R0)</p>  |    |    | <p>Entities:</p> <ul style="list-style-type: none"> <li>'Adaptation': True</li> <li>'Culture': True</li> <li>'Customs and Traditions': False</li> <li>'Europe': False</li> <li>'Immigrants': True</li> <li>'New Language': False</li> <li>'United States': True</li> </ul>    | <p>Dependencies:</p> <ul style="list-style-type: none"> <li>'Causes(Immigrants, Adaptation)': True</li> <li>'Contains(Adaptation, Culture)': False</li> <li>'Requires(Adaptation, Customs and Traditions)': False</li> <li>'Requires(Adaptation, New Language)': False</li> </ul>  | <p>1-GED: 0.50</p> <p>Segments: 57</p> <p>Readability: 1.00</p> <p>MMMG: 0.50</p>  |
| <p>HiDream-II-full</p>   |    |    | <p>Entities:</p> <ul style="list-style-type: none"> <li>'Adaptation': False</li> <li>'Culture': False</li> <li>'Customs and Traditions': False</li> <li>'Europe': False</li> <li>'Immigrants': False</li> <li>'New Language': False</li> <li>'United States': True</li> </ul> | <p>Dependencies:</p> <ul style="list-style-type: none"> <li>'Causes(Immigrants, Adaptation)': True</li> <li>'Contains(Adaptation, Culture)': False</li> <li>'Requires(Adaptation, Customs and Traditions)': False</li> <li>'Requires(Adaptation, New Language)': False</li> </ul>  | <p>1-GED: 0.17</p> <p>Segments: 36</p> <p>Readability: 1.00</p> <p>MMMG: 0.17</p>  |
| <p>FLUX1-[pro]</p>      |   |   | <p>Entities:</p> <ul style="list-style-type: none"> <li>'Adaptation': False</li> <li>'Culture': False</li> <li>'Customs and Traditions': False</li> <li>'Europe': False</li> <li>'Immigrants': False</li> <li>'New Language': False</li> <li>'United States': True</li> </ul> | <p>Dependencies:</p> <ul style="list-style-type: none"> <li>'Causes(Immigrants, Adaptation)': False</li> <li>'Contains(Adaptation, Culture)': False</li> <li>'Requires(Adaptation, Customs and Traditions)': False</li> <li>'Requires(Adaptation, New Language)': False</li> </ul> | <p>1-GED: 0.17</p> <p>Segments: 31</p> <p>Readability: 1.00</p> <p>MMMG: 0.17</p>  |
| <p>Ideogram V2</p>     |  |  | <p>Entities:</p> <ul style="list-style-type: none"> <li>'Adaptation': False</li> <li>'Culture': False</li> <li>'Customs and Traditions': False</li> <li>'Europe': False</li> <li>'Immigrants': False</li> <li>'New Language': False</li> <li>'United States': True</li> </ul> | <p>Dependencies:</p> <ul style="list-style-type: none"> <li>'Causes(Immigrants, Adaptation)': False</li> <li>'Contains(Adaptation, Culture)': False</li> <li>'Requires(Adaptation, Customs and Traditions)': False</li> <li>'Requires(Adaptation, New Language)': False</li> </ul> | <p>1-GED: 0.17</p> <p>Segments: 161</p> <p>Readability: 0.00</p> <p>MMMG: 0.00</p> |
| <p>Infinity-BB</p>     |  |  | <p>Entities:</p> <ul style="list-style-type: none"> <li>'Adaptation': True</li> <li>'Culture': True</li> <li>'Customs and Traditions': False</li> <li>'Europe': False</li> <li>'Immigrants': True</li> <li>'New Language': False</li> <li>'United States': True</li> </ul>    | <p>Dependencies:</p> <ul style="list-style-type: none"> <li>'Causes(Immigrants, Adaptation)': True</li> <li>'Contains(Adaptation, Culture)': False</li> <li>'Requires(Adaptation, Customs and Traditions)': False</li> <li>'Requires(Adaptation, New Language)': False</li> </ul>  | <p>1-GED: 0.50</p> <p>Segments: 149</p> <p>Readability: 0.12</p> <p>MMMG: 0.06</p> |
| <p>Seed-X</p>          |  |  | <p>Entities:</p> <ul style="list-style-type: none"> <li>'Adaptation': False</li> <li>'Culture': False</li> <li>'Customs and Traditions': False</li> <li>'Europe': True</li> <li>'Immigrants': True</li> <li>'New Language': False</li> <li>'United States': True</li> </ul>   | <p>Dependencies:</p> <ul style="list-style-type: none"> <li>'Causes(Immigrants, Adaptation)': False</li> <li>'Contains(Adaptation, Culture)': False</li> <li>'Requires(Adaptation, Customs and Traditions)': False</li> <li>'Requires(Adaptation, New Language)': False</li> </ul> | <p>1-GED: 0.43</p> <p>Segments: 125</p> <p>Readability: 0.39</p> <p>MMMG: 0.17</p> |

Figure 29: MMMG Benchmark visualization for seven representative models on a Secondaryschool-History example. Each row corresponds to one model and, from left to right, displays the generated image, its segmentation map, the reconstructed knowledge graph, the extracted entity and dependency lists, and finally the overall MMMG-Score along with its component sub-scores.

### F.3.9 Philosophy

Question: Visualize an infographic illustrating the cognitive model that demonstrates the relationship between situation, thought, emotion, and behavior.

| Model           | Generated Image                                                                     | Segmentation Map                                                                    | Reconstructed Knowledge Graph                                                       | Entities                                                                                    | Dependencies                                                                                                                    | 1-GED | Segments | Readability | MMMG |
|-----------------|-------------------------------------------------------------------------------------|-------------------------------------------------------------------------------------|-------------------------------------------------------------------------------------|---------------------------------------------------------------------------------------------|---------------------------------------------------------------------------------------------------------------------------------|-------|----------|-------------|------|
| GPT-4o          | 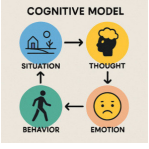   |    |    | Entities:<br>"Behavior": True<br>"Emotion": True<br>"Situation": True<br>"Thought": True    | Dependencies:<br>"Causes(Emotion, Behavior)": True<br>"Causes(Situation, Thought)": True<br>"Causes(Thought, Emotion)": True    | 1.00  | 18       | 1.00        | 1.00 |
| FLUX-Reason (R) |    |    |    | Entities:<br>"Behavior": True<br>"Emotion": True<br>"Situation": True<br>"Thought": True    | Dependencies:<br>"Causes(Emotion, Behavior)": True<br>"Causes(Situation, Thought)": True<br>"Causes(Thought, Emotion)": True    | 1.00  | 12       | 1.00        | 1.00 |
| HiDream-11-full |    |    |    | Entities:<br>"Behavior": False<br>"Emotion": True<br>"Situation": True<br>"Thought": True   | Dependencies:<br>"Causes(Emotion, Behavior)": False<br>"Causes(Situation, Thought)": True<br>"Causes(Thought, Emotion)": True   | 0.67  | 33       | 1.00        | 0.67 |
| FLUX-1-pro      |   |   |   | Entities:<br>"Behavior": False<br>"Emotion": True<br>"Situation": True<br>"Thought": True   | Dependencies:<br>"Causes(Emotion, Behavior)": False<br>"Causes(Situation, Thought)": False<br>"Causes(Thought, Emotion)": False | 0.60  | 59       | 1.00        | 0.60 |
| Ideogram V2     |  |  |  | Entities:<br>"Behavior": False<br>"Emotion": True<br>"Situation": False<br>"Thought": False | Dependencies:<br>"Causes(Emotion, Behavior)": False<br>"Causes(Situation, Thought)": False<br>"Causes(Thought, Emotion)": False | 0.00  | 58       | 1.00        | 0.00 |
| Infinity-BB     |  |  |  | Entities:<br>"Behavior": False<br>"Emotion": True<br>"Situation": True<br>"Thought": True   | Dependencies:<br>"Causes(Emotion, Behavior)": False<br>"Causes(Situation, Thought)": False<br>"Causes(Thought, Emotion)": False | 0.60  | 61       | 1.00        | 0.60 |
| Seed-X          |  |  |  | Entities:<br>"Behavior": True<br>"Emotion": True<br>"Situation": True<br>"Thought": True    | Dependencies:<br>"Causes(Emotion, Behavior)": True<br>"Causes(Situation, Thought)": True<br>"Causes(Thought, Emotion)": True    | 1.00  | 81       | 0.88        | 0.88 |

Figure 30: MMMG Benchmark visualization for seven representative models on a Secondaryschool-Philosophy example. Each row corresponds to one model and, from left to right, displays the generated image, its segmentation map, the reconstructed knowledge graph, the extracted entity and dependency lists, and finally the overall MMMG-Score along with its component sub-scores.

### F.3.10 Literature

Question: Visualize a flowchart depicting the elements of a narrative arc in storytelling.

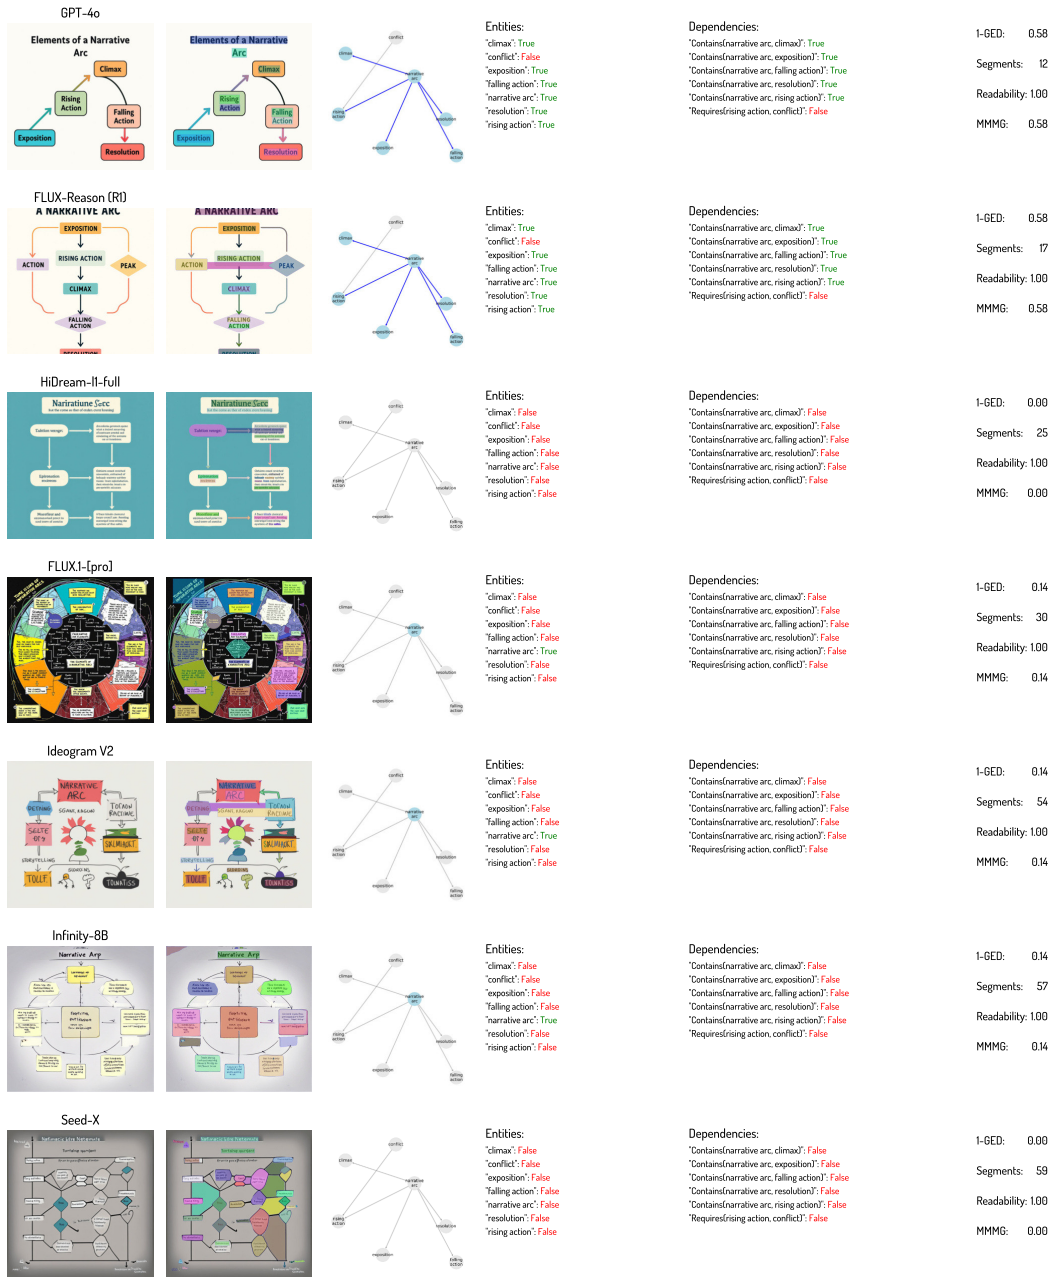

Figure 31: MMMG Benchmark visualization for seven representative models on a Secondaryschool-Literature example. Each row corresponds to one model and, from left to right, displays the generated image, its segmentation map, the reconstructed knowledge graph, the extracted entity and dependency lists, and finally the overall MMMG-Score along with its component sub-scores.

## F.4 High School

### F.4.1 Biology

Question: Visualize an infographic illustrating the key differences between plant and animal cells.

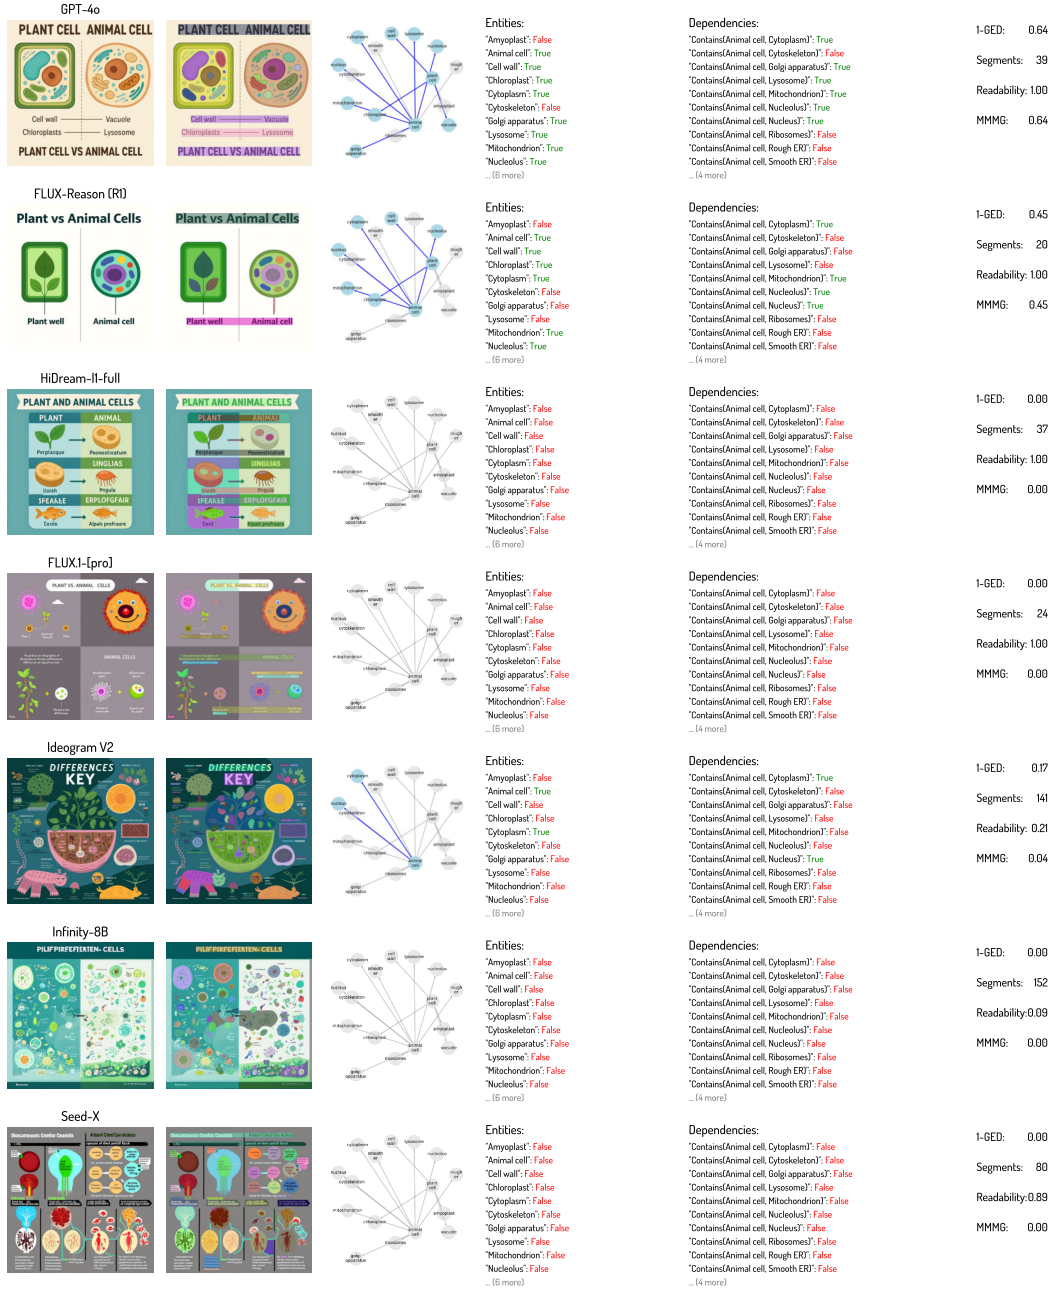

Figure 32: MMMG Benchmark visualization for seven representative models on a Highschool-Biology example. Each row corresponds to one model and, from left to right, displays the generated image, its segmentation map, the reconstructed knowledge graph, the extracted entity and dependency lists, and finally the overall MMMG-Score along with its component sub-scores.



### F.4.3 Mathematics

Question: Visualize an infographic depicting the relationships between sets A, B, and their intersection.

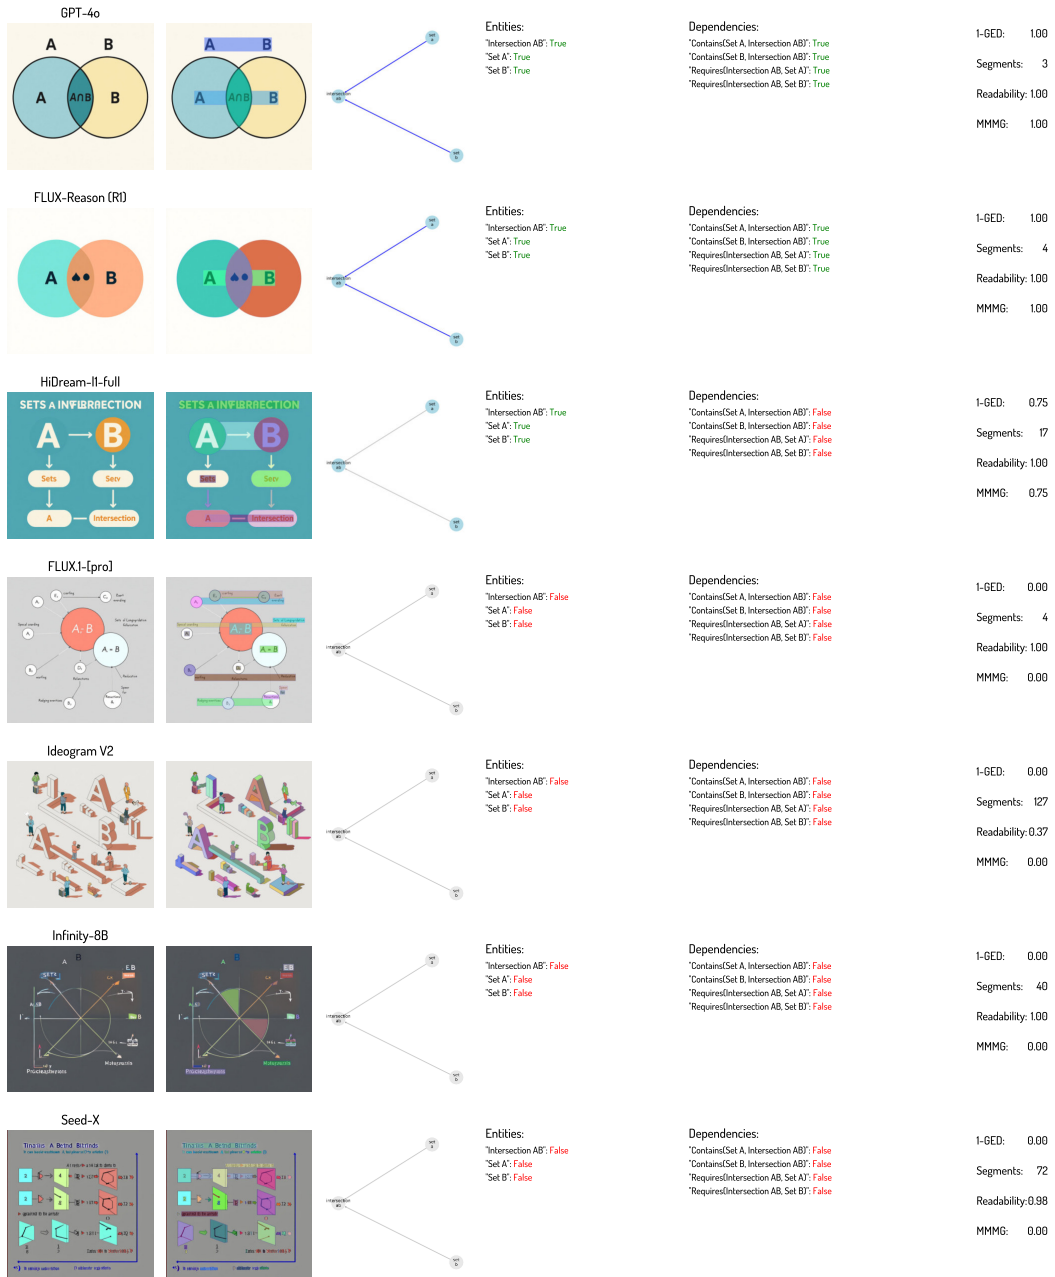

Figure 34: MMMG Benchmark visualization for seven representative models on a Highschool-Mathematics example. Each row corresponds to one model and, from left to right, displays the generated image, its segmentation map, the reconstructed knowledge graph, the extracted entity and dependency lists, and finally the overall MMMG-Score along with its component sub-scores.

## F.4.4 Engineering

Question: Visualize an infographic detailing the key components and dynamics of sound wave propagation.

| Model            | Generated Image                                                                     | Segmentation Map                                                                    | Reconstructed Knowledge Graph                                                       | Entities                                                                                                                                                                               | Dependencies                                                                                                                                                                                                                                                                            | 1-GED       | Segments      | Readability       | MMMG       |
|------------------|-------------------------------------------------------------------------------------|-------------------------------------------------------------------------------------|-------------------------------------------------------------------------------------|----------------------------------------------------------------------------------------------------------------------------------------------------------------------------------------|-----------------------------------------------------------------------------------------------------------------------------------------------------------------------------------------------------------------------------------------------------------------------------------------|-------------|---------------|-------------------|------------|
| GPT-4o           | 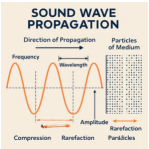   |    |    | Entities:<br>'Amplitude': True<br>'Compression': True<br>'Crest': True<br>'Rarefaction': True<br>'Sound Waves': True<br>'Speaker': False<br>'Trough': True<br>'Wavelength': True       | Dependencies:<br>'Contains(Sound Waves, Compression)': True<br>'Contains(Sound Waves, Rarefaction)': True<br>'Contains(Sound Waves, Wavelength)': True<br>'Contains(Wavelength, Crest)': False<br>'Contains(Wavelength, Trough)': True<br>'Requires(Sound Waves, Amplitude)': True      | 1-GED: 0.62 | Segments: 16  | Readability: 1.00 | MMMG: 0.62 |
| FLUX-Reason (R1) |    |    |    | Entities:<br>'Amplitude': False<br>'Compression': False<br>'Crest': True<br>'Rarefaction': False<br>'Sound Waves': True<br>'Speaker': True<br>'Trough': True<br>'Wavelength': True     | Dependencies:<br>'Contains(Sound Waves, Compression)': False<br>'Contains(Sound Waves, Rarefaction)': False<br>'Contains(Sound Waves, Wavelength)': True<br>'Contains(Wavelength, Crest)': True<br>'Contains(Wavelength, Trough)': True<br>'Requires(Sound Waves, Amplitude)': False    | 1-GED: 0.55 | Segments: 50  | Readability: 1.00 | MMMG: 0.55 |
| HiDream-11-full  |    |    |    | Entities:<br>'Amplitude': True<br>'Compression': False<br>'Crest': True<br>'Rarefaction': False<br>'Sound Waves': True<br>'Speaker': False<br>'Trough': True<br>'Wavelength': False    | Dependencies:<br>'Contains(Sound Waves, Compression)': False<br>'Contains(Sound Waves, Rarefaction)': False<br>'Contains(Sound Waves, Wavelength)': False<br>'Contains(Wavelength, Crest)': False<br>'Contains(Wavelength, Trough)': False<br>'Requires(Sound Waves, Amplitude)': False | 1-GED: 0.44 | Segments: 20  | Readability: 1.00 | MMMG: 0.44 |
| FLUX1-[pro]      |    |    |    | Entities:<br>'Amplitude': False<br>'Compression': False<br>'Crest': True<br>'Rarefaction': False<br>'Sound Waves': True<br>'Speaker': True<br>'Trough': True<br>'Wavelength': False    | Dependencies:<br>'Contains(Sound Waves, Compression)': False<br>'Contains(Sound Waves, Rarefaction)': False<br>'Contains(Sound Waves, Wavelength)': False<br>'Contains(Wavelength, Crest)': False<br>'Contains(Wavelength, Trough)': False<br>'Requires(Sound Waves, Amplitude)': False | 1-GED: 0.44 | Segments: 10  | Readability: 1.00 | MMMG: 0.44 |
| Ideogram V2      |  |  |  | Entities:<br>'Amplitude': False<br>'Compression': False<br>'Crest': False<br>'Rarefaction': False<br>'Sound Waves': True<br>'Speaker': False<br>'Trough': False<br>'Wavelength': False | Dependencies:<br>'Contains(Sound Waves, Compression)': False<br>'Contains(Sound Waves, Rarefaction)': False<br>'Contains(Sound Waves, Wavelength)': False<br>'Contains(Wavelength, Crest)': False<br>'Contains(Wavelength, Trough)': False<br>'Requires(Sound Waves, Amplitude)': False | 1-GED: 0.13 | Segments: 72  | Readability: 0.98 | MMMG: 0.13 |
| Infinity-8B      |  |  |  | Entities:<br>'Amplitude': True<br>'Compression': False<br>'Crest': False<br>'Rarefaction': False<br>'Sound Waves': True<br>'Speaker': True<br>'Trough': True<br>'Wavelength': True     | Dependencies:<br>'Contains(Sound Waves, Compression)': False<br>'Contains(Sound Waves, Rarefaction)': False<br>'Contains(Sound Waves, Wavelength)': True<br>'Contains(Wavelength, Crest)': False<br>'Contains(Wavelength, Trough)': False<br>'Requires(Sound Waves, Amplitude)': False  | 1-GED: 0.53 | Segments: 55  | Readability: 1.00 | MMMG: 0.53 |
| Seed-X           |  |  |  | Entities:<br>'Amplitude': False<br>'Compression': False<br>'Crest': False<br>'Rarefaction': False<br>'Sound Waves': True<br>'Speaker': False<br>'Trough': False<br>'Wavelength': False | Dependencies:<br>'Contains(Sound Waves, Compression)': False<br>'Contains(Sound Waves, Rarefaction)': False<br>'Contains(Sound Waves, Wavelength)': False<br>'Contains(Wavelength, Crest)': False<br>'Contains(Wavelength, Trough)': False<br>'Requires(Sound Waves, Amplitude)': False | 1-GED: 0.13 | Segments: 110 | Readability: 0.56 | MMMG: 0.07 |

Figure 35: MMMG Benchmark visualization for seven representative models on a Highschool-Engineering example. Each row corresponds to one model and, from left to right, displays the generated image, its segmentation map, the reconstructed knowledge graph, the extracted entity and dependency lists, and finally the overall MMMG-Score along with its component sub-scores.

## F.4.5 Geography

Question: Visualize an educational diagram highlighting the key zones and features of a glacier.

|                                                                                                                  |                                                                                     |                                                                                     |                                                                                                                                                                                                                                                                                                                                |                                                                                                                                                                                                                                                                                                                                                                                              |                                                                                    |
|------------------------------------------------------------------------------------------------------------------|-------------------------------------------------------------------------------------|-------------------------------------------------------------------------------------|--------------------------------------------------------------------------------------------------------------------------------------------------------------------------------------------------------------------------------------------------------------------------------------------------------------------------------|----------------------------------------------------------------------------------------------------------------------------------------------------------------------------------------------------------------------------------------------------------------------------------------------------------------------------------------------------------------------------------------------|------------------------------------------------------------------------------------|
| <p><b>GPT-4o</b></p> 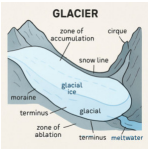           |    |    | <p>Entities:</p> <ul style="list-style-type: none"> <li>'Ablation zone': True</li> <li>'Accumulation zone': True</li> <li>'Cleavasses': False</li> <li>'Equilibrium line': False</li> <li>'Frin': False</li> <li>'Ground moraine': False</li> <li>'Moraine': True</li> <li>'Moulin': False</li> <li>'Snow': True</li> </ul>    | <p>Dependencies:</p> <ul style="list-style-type: none"> <li>'Contains(Ablation zone, Cleavasses)': False</li> <li>'Contains(Ablation zone, Moulin)': False</li> <li>'Contains(Moraine, Ground moraine)': False</li> <li>'Contains(Snow, Accumulation zone)': True</li> <li>'Defines(Equilibrium line, Ablation zone)': False</li> <li>'Requires(Accumulation zone, Frin)': False</li> </ul>  | <p>1-GED: 0.38</p> <p>Segments: 17</p> <p>Readability: 1.00</p> <p>MMMG: 0.38</p>  |
| <p><b>FLUX-Reason (R1)</b></p>  |    |    | <p>Entities:</p> <ul style="list-style-type: none"> <li>'Ablation zone': False</li> <li>'Accumulation zone': True</li> <li>'Cleavasses': False</li> <li>'Equilibrium line': False</li> <li>'Frin': False</li> <li>'Ground moraine': False</li> <li>'Moraine': True</li> <li>'Moulin': False</li> <li>'Snow': True</li> </ul>   | <p>Dependencies:</p> <ul style="list-style-type: none"> <li>'Contains(Ablation zone, Cleavasses)': False</li> <li>'Contains(Ablation zone, Moulin)': False</li> <li>'Contains(Moraine, Ground moraine)': False</li> <li>'Contains(Snow, Accumulation zone)': False</li> <li>'Defines(Equilibrium line, Ablation zone)': False</li> <li>'Requires(Accumulation zone, Frin)': False</li> </ul> | <p>1-GED: 0.32</p> <p>Segments: 38</p> <p>Readability: 1.00</p> <p>MMMG: 0.32</p>  |
| <p><b>HiDream-11-full</b></p>   |    |    | <p>Entities:</p> <ul style="list-style-type: none"> <li>'Ablation zone': False</li> <li>'Accumulation zone': False</li> <li>'Cleavasses': True</li> <li>'Equilibrium line': False</li> <li>'Frin': False</li> <li>'Ground moraine': False</li> <li>'Moraine': True</li> <li>'Moulin': False</li> <li>'Snow': True</li> </ul>   | <p>Dependencies:</p> <ul style="list-style-type: none"> <li>'Contains(Ablation zone, Cleavasses)': False</li> <li>'Contains(Ablation zone, Moulin)': False</li> <li>'Contains(Moraine, Ground moraine)': False</li> <li>'Contains(Snow, Accumulation zone)': False</li> <li>'Defines(Equilibrium line, Ablation zone)': False</li> <li>'Requires(Accumulation zone, Frin)': False</li> </ul> | <p>1-GED: 0.32</p> <p>Segments: 23</p> <p>Readability: 1.00</p> <p>MMMG: 0.32</p>  |
| <p><b>FLUX1-[pro]</b></p>       |    |    | <p>Entities:</p> <ul style="list-style-type: none"> <li>'Ablation zone': False</li> <li>'Accumulation zone': False</li> <li>'Cleavasses': False</li> <li>'Equilibrium line': False</li> <li>'Frin': False</li> <li>'Ground moraine': False</li> <li>'Moraine': False</li> <li>'Moulin': False</li> <li>'Snow': True</li> </ul> | <p>Dependencies:</p> <ul style="list-style-type: none"> <li>'Contains(Ablation zone, Cleavasses)': False</li> <li>'Contains(Ablation zone, Moulin)': False</li> <li>'Contains(Moraine, Ground moraine)': False</li> <li>'Contains(Snow, Accumulation zone)': False</li> <li>'Defines(Equilibrium line, Ablation zone)': False</li> <li>'Requires(Accumulation zone, Frin)': False</li> </ul> | <p>1-GED: 0.12</p> <p>Segments: 12</p> <p>Readability: 1.00</p> <p>MMMG: 0.12</p>  |
| <p><b>Ideogram V2</b></p>     |  |  | <p>Entities:</p> <ul style="list-style-type: none"> <li>'Ablation zone': False</li> <li>'Accumulation zone': False</li> <li>'Cleavasses': True</li> <li>'Equilibrium line': False</li> <li>'Frin': False</li> <li>'Ground moraine': False</li> <li>'Moraine': False</li> <li>'Moulin': False</li> <li>'Snow': True</li> </ul>  | <p>Dependencies:</p> <ul style="list-style-type: none"> <li>'Contains(Ablation zone, Cleavasses)': False</li> <li>'Contains(Ablation zone, Moulin)': False</li> <li>'Contains(Moraine, Ground moraine)': False</li> <li>'Contains(Snow, Accumulation zone)': False</li> <li>'Defines(Equilibrium line, Ablation zone)': False</li> <li>'Requires(Accumulation zone, Frin)': False</li> </ul> | <p>1-GED: 0.12</p> <p>Segments: 130</p> <p>Readability: 0.33</p> <p>MMMG: 0.04</p> |
| <p><b>Infinity-8B</b></p>     |  |  | <p>Entities:</p> <ul style="list-style-type: none"> <li>'Ablation zone': False</li> <li>'Accumulation zone': False</li> <li>'Cleavasses': True</li> <li>'Equilibrium line': False</li> <li>'Frin': False</li> <li>'Ground moraine': False</li> <li>'Moraine': False</li> <li>'Moulin': False</li> <li>'Snow': True</li> </ul>  | <p>Dependencies:</p> <ul style="list-style-type: none"> <li>'Contains(Ablation zone, Cleavasses)': False</li> <li>'Contains(Ablation zone, Moulin)': False</li> <li>'Contains(Moraine, Ground moraine)': False</li> <li>'Contains(Snow, Accumulation zone)': False</li> <li>'Defines(Equilibrium line, Ablation zone)': False</li> <li>'Requires(Accumulation zone, Frin)': False</li> </ul> | <p>1-GED: 0.22</p> <p>Segments: 52</p> <p>Readability: 1.00</p> <p>MMMG: 0.22</p>  |
| <p><b>Seed-X</b></p>          |  |  | <p>Entities:</p> <ul style="list-style-type: none"> <li>'Ablation zone': True</li> <li>'Accumulation zone': True</li> <li>'Cleavasses': True</li> <li>'Equilibrium line': True</li> <li>'Frin': False</li> <li>'Ground moraine': False</li> <li>'Moraine': True</li> <li>'Moulin': False</li> <li>'Snow': True</li> </ul>      | <p>Dependencies:</p> <ul style="list-style-type: none"> <li>'Contains(Ablation zone, Cleavasses)': True</li> <li>'Contains(Ablation zone, Moulin)': False</li> <li>'Contains(Moraine, Ground moraine)': False</li> <li>'Contains(Snow, Accumulation zone)': True</li> <li>'Defines(Equilibrium line, Ablation zone)': True</li> <li>'Requires(Accumulation zone, Frin)': False</li> </ul>    | <p>1-GED: 0.54</p> <p>Segments: 55</p> <p>Readability: 1.00</p> <p>MMMG: 0.54</p>  |

Figure 36: MMMG Benchmark visualization for seven representative models on a Highschool-Geography example. Each row corresponds to one model and, from left to right, displays the generated image, its segmentation map, the reconstructed knowledge graph, the extracted entity and dependency lists, and finally the overall MMMG-Score along with its component sub-scores.

## F.4.6 Economics

Question: Visualize an infographic depicting the dynamics of stagflation, illustrating the relationships between GDP, unemployment, demand, and inflation during a recession.

|                                                                                                           |                                                                                     |                                                                                     |                                                                                                                                            |                                                                                                                                                                                                                        |                                                                                                     |
|-----------------------------------------------------------------------------------------------------------|-------------------------------------------------------------------------------------|-------------------------------------------------------------------------------------|--------------------------------------------------------------------------------------------------------------------------------------------|------------------------------------------------------------------------------------------------------------------------------------------------------------------------------------------------------------------------|-----------------------------------------------------------------------------------------------------|
| <p>GPT-4o</p> 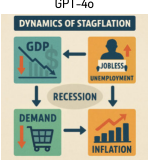           |    |    | <p>Entities:<br/>         "Demand": True<br/>         "GDP": True<br/>         "Inflation": True<br/>         "Unemployment": True</p>     | <p>Dependencies:<br/>         "Causes(Inflation, Demand)": True<br/>         "Causes(Unemployment, GDP)": True<br/>         "Inflation": True<br/>         "Requires(GDP, Demand)": False</p>                          | <p>1-GED: 0.93<br/>         Segments: 29<br/>         Readability: 1.00<br/>         MMMG: 0.93</p> |
| <p>FLUX-Reason (R1)</p>  |    |    | <p>Entities:<br/>         "Demand": False<br/>         "GDP": True<br/>         "Inflation": True<br/>         "Unemployment": False</p>   | <p>Dependencies:<br/>         "Causes(Inflation, Demand)": False<br/>         "Causes(Unemployment, GDP)": False<br/>         "Inflation": True<br/>         "Requires(GDP, Demand)": False</p>                        | <p>1-GED: 0.40<br/>         Segments: 27<br/>         Readability: 1.00<br/>         MMMG: 0.40</p> |
| <p>HiDream-II-full</p>   |    |    | <p>Entities:<br/>         "Demand": False<br/>         "GDP": True<br/>         "Inflation": True<br/>         "Unemployment": True</p>    | <p>Dependencies:<br/>         "Causes(Inflation, Demand)": False<br/>         "Causes(Unemployment, GDP)": False<br/>         "Causes(Unemployment, Inflation)": False<br/>         "Requires(GDP, Demand)": False</p> | <p>1-GED: 0.55<br/>         Segments: 15<br/>         Readability: 1.00<br/>         MMMG: 0.55</p> |
| <p>FLUX1-[pro]</p>      |   |   | <p>Entities:<br/>         "Demand": True<br/>         "GDP": True<br/>         "Inflation": True<br/>         "Unemployment": True</p>     | <p>Dependencies:<br/>         "Causes(Inflation, Demand)": False<br/>         "Causes(Unemployment, GDP)": False<br/>         "Causes(Unemployment, Inflation)": False<br/>         "Requires(GDP, Demand)": False</p> | <p>1-GED: 0.67<br/>         Segments: 3<br/>         Readability: 1.00<br/>         MMMG: 0.67</p>  |
| <p>Ideogram V2</p>     |  |  | <p>Entities:<br/>         "Demand": True<br/>         "GDP": True<br/>         "Inflation": True<br/>         "Unemployment": True</p>     | <p>Dependencies:<br/>         "Causes(Inflation, Demand)": False<br/>         "Causes(Unemployment, GDP)": False<br/>         "Causes(Unemployment, Inflation)": False<br/>         "Requires(GDP, Demand)": False</p> | <p>1-GED: 0.67<br/>         Segments: 68<br/>         Readability: 1.00<br/>         MMMG: 0.67</p> |
| <p>Infinity-BB</p>     |  |  | <p>Entities:<br/>         "Demand": True<br/>         "GDP": True<br/>         "Inflation": True<br/>         "Unemployment": True</p>     | <p>Dependencies:<br/>         "Causes(Inflation, Demand)": False<br/>         "Causes(Unemployment, GDP)": False<br/>         "Causes(Unemployment, Inflation)": False<br/>         "Requires(GDP, Demand)": False</p> | <p>1-GED: 0.67<br/>         Segments: 87<br/>         Readability: 0.81<br/>         MMMG: 0.54</p> |
| <p>Seed-X</p>          |  |  | <p>Entities:<br/>         "Demand": False<br/>         "GDP": False<br/>         "Inflation": False<br/>         "Unemployment": False</p> | <p>Dependencies:<br/>         "Causes(Inflation, Demand)": False<br/>         "Causes(Unemployment, GDP)": False<br/>         "Causes(Unemployment, Inflation)": False<br/>         "Requires(GDP, Demand)": False</p> | <p>1-GED: 0.00<br/>         Segments: 80<br/>         Readability: 0.89<br/>         MMMG: 0.00</p> |

Figure 37: MMMG Benchmark visualization for seven representative models on a Highschool-Economics example. Each row corresponds to one model and, from left to right, displays the generated image, its segmentation map, the reconstructed knowledge graph, the extracted entity and dependency lists, and finally the overall MMMG-Score along with its component sub-scores.

## F.4.7 Sociology

Question: Visualize the interrelation of vision, mission, goals, strategies, and tactics in achieving organizational success.

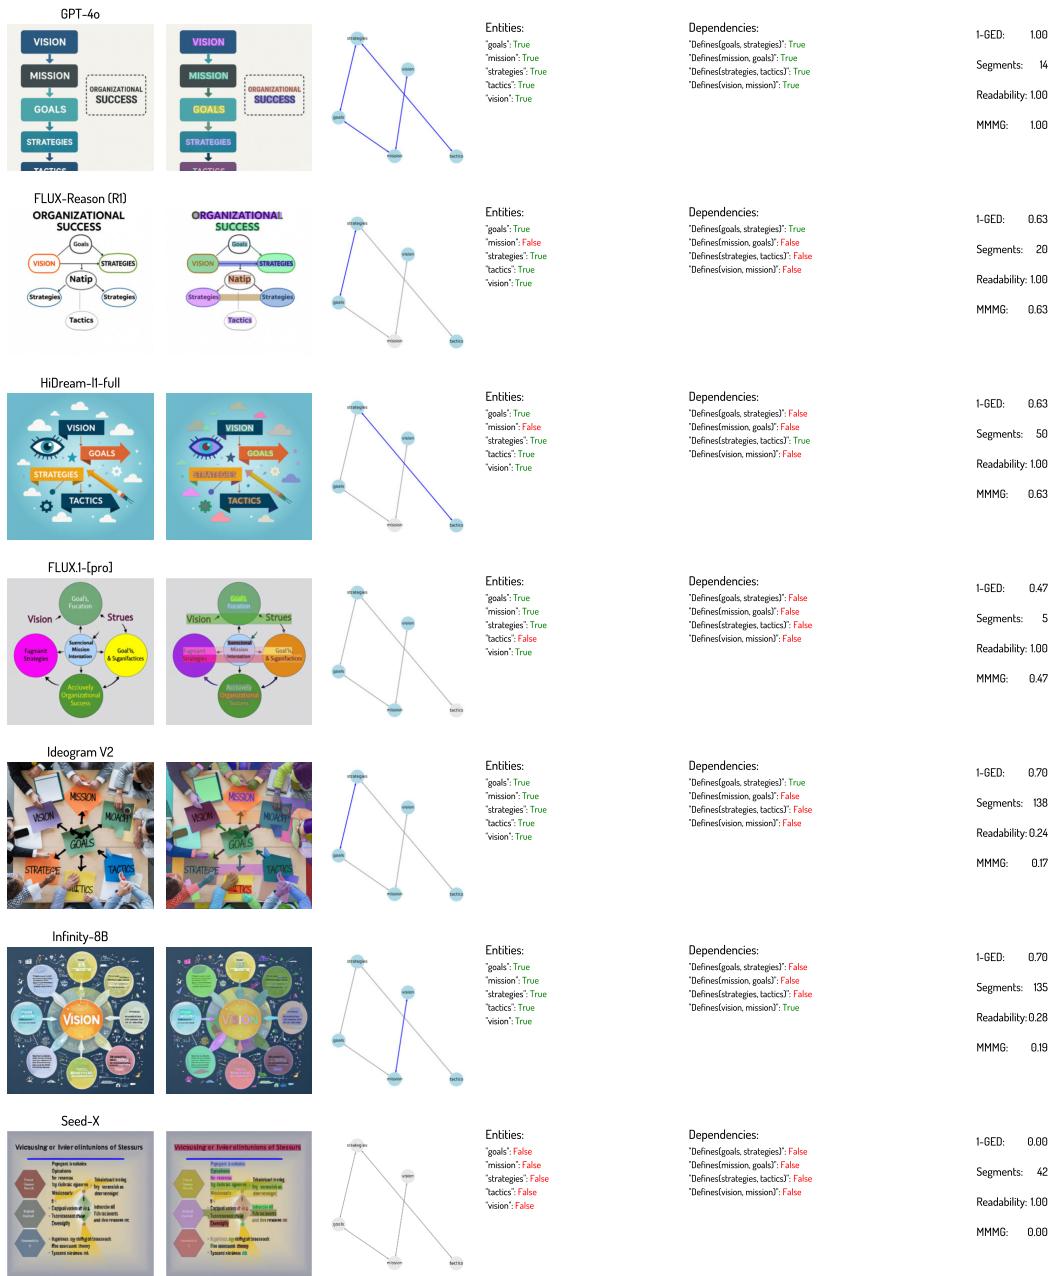

Figure 38: MMMG Benchmark visualization for seven representative models on a Highschool-Sociology example. Each row corresponds to one model and, from left to right, displays the generated image, its segmentation map, the reconstructed knowledge graph, the extracted entity and dependency lists, and finally the overall MMMG-Score along with its component sub-scores.

## F.4.8 History

Question: Visualize an infographic depicting the main components and structure of the United Nations.

|                                                                                     |                                                                                     |                                                                                     |                                                                                                                                                                                                                                                                                                                                    |                                                                                                                                                                                                                                                                                                                                                                                                                                                                    |                                                                                    |
|-------------------------------------------------------------------------------------|-------------------------------------------------------------------------------------|-------------------------------------------------------------------------------------|------------------------------------------------------------------------------------------------------------------------------------------------------------------------------------------------------------------------------------------------------------------------------------------------------------------------------------|--------------------------------------------------------------------------------------------------------------------------------------------------------------------------------------------------------------------------------------------------------------------------------------------------------------------------------------------------------------------------------------------------------------------------------------------------------------------|------------------------------------------------------------------------------------|
|    |    |    | <p>Entities:</p> <ul style="list-style-type: none"> <li>'Economic and Social Council': False</li> <li>'General Assembly': True</li> <li>'International Court of Justice': True</li> <li>'Secretariat': True</li> <li>'Security Council': True</li> <li>'Trusteeship Council': True</li> <li>'United Nations': True</li> </ul>      | <p>Dependencies:</p> <ul style="list-style-type: none"> <li>'Contains(United Nations, Economic and Social Council)': False</li> <li>'Contains(United Nations, General Assembly)': True</li> <li>'Contains(United Nations, International Court of Justice)': True</li> <li>'Contains(United Nations, Secretariat)': True</li> <li>'Contains(United Nations, Security Council)': True</li> <li>'Contains(United Nations, Trusteeship Council)': True</li> </ul>      | <p>1-GED: 0.50</p> <p>Segments: 42</p> <p>Readability: 1.00</p> <p>MMMG: 0.50</p>  |
|    |    |    | <p>Entities:</p> <ul style="list-style-type: none"> <li>'Economic and Social Council': True</li> <li>'General Assembly': True</li> <li>'International Court of Justice': False</li> <li>'Secretariat': False</li> <li>'Security Council': False</li> <li>'Trusteeship Council': False</li> <li>'United Nations': True</li> </ul>   | <p>Dependencies:</p> <ul style="list-style-type: none"> <li>'Contains(United Nations, Economic and Social Council)': True</li> <li>'Contains(United Nations, General Assembly)': True</li> <li>'Contains(United Nations, International Court of Justice)': False</li> <li>'Contains(United Nations, Secretariat)': False</li> <li>'Contains(United Nations, Security Council)': False</li> <li>'Contains(United Nations, Trusteeship Council)': False</li> </ul>   | <p>1-GED: 0.33</p> <p>Segments: 31</p> <p>Readability: 1.00</p> <p>MMMG: 0.33</p>  |
|    |    |    | <p>Entities:</p> <ul style="list-style-type: none"> <li>'Economic and Social Council': False</li> <li>'General Assembly': False</li> <li>'International Court of Justice': False</li> <li>'Secretariat': False</li> <li>'Security Council': False</li> <li>'Trusteeship Council': False</li> <li>'United Nations': True</li> </ul> | <p>Dependencies:</p> <ul style="list-style-type: none"> <li>'Contains(United Nations, Economic and Social Council)': False</li> <li>'Contains(United Nations, General Assembly)': False</li> <li>'Contains(United Nations, International Court of Justice)': False</li> <li>'Contains(United Nations, Secretariat)': False</li> <li>'Contains(United Nations, Security Council)': False</li> <li>'Contains(United Nations, Trusteeship Council)': False</li> </ul> | <p>1-GED: 0.14</p> <p>Segments: 83</p> <p>Readability: 0.86</p> <p>MMMG: 0.12</p>  |
|   |   |   | <p>Entities:</p> <ul style="list-style-type: none"> <li>'Economic and Social Council': False</li> <li>'General Assembly': False</li> <li>'International Court of Justice': False</li> <li>'Secretariat': False</li> <li>'Security Council': False</li> <li>'Trusteeship Council': False</li> <li>'United Nations': True</li> </ul> | <p>Dependencies:</p> <ul style="list-style-type: none"> <li>'Contains(United Nations, Economic and Social Council)': False</li> <li>'Contains(United Nations, General Assembly)': False</li> <li>'Contains(United Nations, International Court of Justice)': False</li> <li>'Contains(United Nations, Secretariat)': False</li> <li>'Contains(United Nations, Security Council)': False</li> <li>'Contains(United Nations, Trusteeship Council)': False</li> </ul> | <p>1-GED: 0.14</p> <p>Segments: 4</p> <p>Readability: 1.00</p> <p>MMMG: 0.14</p>   |
|  |  |  | <p>Entities:</p> <ul style="list-style-type: none"> <li>'Economic and Social Council': False</li> <li>'General Assembly': False</li> <li>'International Court of Justice': True</li> <li>'Secretariat': False</li> <li>'Security Council': False</li> <li>'Trusteeship Council': False</li> <li>'United Nations': True</li> </ul>  | <p>Dependencies:</p> <ul style="list-style-type: none"> <li>'Contains(United Nations, Economic and Social Council)': False</li> <li>'Contains(United Nations, General Assembly)': False</li> <li>'Contains(United Nations, International Court of Justice)': False</li> <li>'Contains(United Nations, Secretariat)': False</li> <li>'Contains(United Nations, Security Council)': False</li> <li>'Contains(United Nations, Trusteeship Council)': False</li> </ul> | <p>1-GED: 0.27</p> <p>Segments: 177</p> <p>Readability: 0.00</p> <p>MMMG: 0.00</p> |
|  |  |  | <p>Entities:</p> <ul style="list-style-type: none"> <li>'Economic and Social Council': True</li> <li>'General Assembly': True</li> <li>'International Court of Justice': True</li> <li>'Secretariat': True</li> <li>'Security Council': True</li> <li>'Trusteeship Council': True</li> <li>'United Nations': True</li> </ul>       | <p>Dependencies:</p> <ul style="list-style-type: none"> <li>'Contains(United Nations, Economic and Social Council)': True</li> <li>'Contains(United Nations, General Assembly)': True</li> <li>'Contains(United Nations, International Court of Justice)': True</li> <li>'Contains(United Nations, Secretariat)': True</li> <li>'Contains(United Nations, Security Council)': True</li> <li>'Contains(United Nations, Trusteeship Council)': True</li> </ul>       | <p>1-GED: 1.00</p> <p>Segments: 136</p> <p>Readability: 0.27</p> <p>MMMG: 0.27</p> |
|  |  |  | <p>Entities:</p> <ul style="list-style-type: none"> <li>'Economic and Social Council': False</li> <li>'General Assembly': False</li> <li>'International Court of Justice': False</li> <li>'Secretariat': False</li> <li>'Security Council': False</li> <li>'Trusteeship Council': False</li> <li>'United Nations': True</li> </ul> | <p>Dependencies:</p> <ul style="list-style-type: none"> <li>'Contains(United Nations, Economic and Social Council)': False</li> <li>'Contains(United Nations, General Assembly)': False</li> <li>'Contains(United Nations, International Court of Justice)': False</li> <li>'Contains(United Nations, Secretariat)': False</li> <li>'Contains(United Nations, Security Council)': False</li> <li>'Contains(United Nations, Trusteeship Council)': False</li> </ul> | <p>1-GED: 0.14</p> <p>Segments: 83</p> <p>Readability: 0.86</p> <p>MMMG: 0.12</p>  |

Figure 39: MMMG Benchmark visualization for seven representative models on a Highschool-History example. Each row corresponds to one model and, from left to right, displays the generated image, its segmentation map, the reconstructed knowledge graph, the extracted entity and dependency lists, and finally the overall MMMG-Score along with its component sub-scores.

## F.4.9 Philosophy

Question: Visualize an educational poster that showcases the different types of inductive reasoning.

|                                                                                                                                                                                             |                                                                                     |                                                                                                                                                                                                                                                                                                                 |                                                                                                                                                                                                                                                                                                                                                                                                                                                                         |                                                                                   |
|---------------------------------------------------------------------------------------------------------------------------------------------------------------------------------------------|-------------------------------------------------------------------------------------|-----------------------------------------------------------------------------------------------------------------------------------------------------------------------------------------------------------------------------------------------------------------------------------------------------------------|-------------------------------------------------------------------------------------------------------------------------------------------------------------------------------------------------------------------------------------------------------------------------------------------------------------------------------------------------------------------------------------------------------------------------------------------------------------------------|-----------------------------------------------------------------------------------|
| <p>GPT-4o</p>             |    | <p>Entities:</p> <ul style="list-style-type: none"> <li>"Analogy": True</li> <li>"Casual Reasoning": True</li> <li>"Generalization": True</li> <li>"Inductive Reasoning": True</li> <li>"Predictive Reasoning": False</li> <li>"Sample Reasoning": False</li> <li>"Statistical Reasoning": False</li> </ul>     | <p>Dependencies:</p> <ul style="list-style-type: none"> <li>"Contains(Inductive Reasoning, Analogy)": True</li> <li>"Contains(Inductive Reasoning, Casual Reasoning)": True</li> <li>"Contains(Inductive Reasoning, Generalization)": True</li> <li>"Contains(Inductive Reasoning, Predictive Reasoning)": False</li> <li>"Contains(Inductive Reasoning, Sample Reasoning)": False</li> <li>"Contains(Inductive Reasoning, Statistical Reasoning)": False</li> </ul>    | <p>1-GED: 0.40</p> <p>Segments: 24</p> <p>Readability: 1.00</p> <p>MMMG: 0.40</p> |
| <p>FLUX-Reason (R1)</p>   |    | <p>Entities:</p> <ul style="list-style-type: none"> <li>"Analogy": True</li> <li>"Casual Reasoning": False</li> <li>"Generalization": True</li> <li>"Inductive Reasoning": True</li> <li>"Predictive Reasoning": False</li> <li>"Sample Reasoning": False</li> <li>"Statistical Reasoning": True</li> </ul>     | <p>Dependencies:</p> <ul style="list-style-type: none"> <li>"Contains(Inductive Reasoning, Analogy)": True</li> <li>"Contains(Inductive Reasoning, Casual Reasoning)": False</li> <li>"Contains(Inductive Reasoning, Generalization)": True</li> <li>"Contains(Inductive Reasoning, Predictive Reasoning)": False</li> <li>"Contains(Inductive Reasoning, Sample Reasoning)": False</li> <li>"Contains(Inductive Reasoning, Statistical Reasoning)": True</li> </ul>    | <p>1-GED: 0.40</p> <p>Segments: 62</p> <p>Readability: 1.00</p> <p>MMMG: 0.40</p> |
| <p>HiDream-11-full</p>    |    | <p>Entities:</p> <ul style="list-style-type: none"> <li>"Analogy": False</li> <li>"Casual Reasoning": False</li> <li>"Generalization": True</li> <li>"Inductive Reasoning": True</li> <li>"Predictive Reasoning": False</li> <li>"Sample Reasoning": False</li> <li>"Statistical Reasoning": False</li> </ul>   | <p>Dependencies:</p> <ul style="list-style-type: none"> <li>"Contains(Inductive Reasoning, Analogy)": False</li> <li>"Contains(Inductive Reasoning, Casual Reasoning)": False</li> <li>"Contains(Inductive Reasoning, Generalization)": True</li> <li>"Contains(Inductive Reasoning, Predictive Reasoning)": False</li> <li>"Contains(Inductive Reasoning, Sample Reasoning)": False</li> <li>"Contains(Inductive Reasoning, Statistical Reasoning)": False</li> </ul>  | <p>1-GED: 0.14</p> <p>Segments: 47</p> <p>Readability: 1.00</p> <p>MMMG: 0.14</p> |
| <p>FLUX1-[pro]</p>      |   | <p>Entities:</p> <ul style="list-style-type: none"> <li>"Analogy": False</li> <li>"Casual Reasoning": False</li> <li>"Generalization": False</li> <li>"Inductive Reasoning": True</li> <li>"Predictive Reasoning": False</li> <li>"Sample Reasoning": False</li> <li>"Statistical Reasoning": False</li> </ul>  | <p>Dependencies:</p> <ul style="list-style-type: none"> <li>"Contains(Inductive Reasoning, Analogy)": False</li> <li>"Contains(Inductive Reasoning, Casual Reasoning)": False</li> <li>"Contains(Inductive Reasoning, Generalization)": False</li> <li>"Contains(Inductive Reasoning, Predictive Reasoning)": False</li> <li>"Contains(Inductive Reasoning, Sample Reasoning)": False</li> <li>"Contains(Inductive Reasoning, Statistical Reasoning)": False</li> </ul> | <p>1-GED: 0.14</p> <p>Segments: 74</p> <p>Readability: 0.96</p> <p>MMMG: 0.14</p> |
| <p>Ideogram V2</p>    |  | <p>Entities:</p> <ul style="list-style-type: none"> <li>"Analogy": False</li> <li>"Casual Reasoning": False</li> <li>"Generalization": False</li> <li>"Inductive Reasoning": True</li> <li>"Predictive Reasoning": False</li> <li>"Sample Reasoning": False</li> <li>"Statistical Reasoning": False</li> </ul>  | <p>Dependencies:</p> <ul style="list-style-type: none"> <li>"Contains(Inductive Reasoning, Analogy)": False</li> <li>"Contains(Inductive Reasoning, Casual Reasoning)": False</li> <li>"Contains(Inductive Reasoning, Generalization)": False</li> <li>"Contains(Inductive Reasoning, Predictive Reasoning)": False</li> <li>"Contains(Inductive Reasoning, Sample Reasoning)": False</li> <li>"Contains(Inductive Reasoning, Statistical Reasoning)": False</li> </ul> | <p>1-GED: 0.14</p> <p>Segments: 90</p> <p>Readability: 0.78</p> <p>MMMG: 0.11</p> |
| <p>Infinity-8B</p>    |  | <p>Entities:</p> <ul style="list-style-type: none"> <li>"Analogy": False</li> <li>"Casual Reasoning": False</li> <li>"Generalization": False</li> <li>"Inductive Reasoning": True</li> <li>"Predictive Reasoning": False</li> <li>"Sample Reasoning": False</li> <li>"Statistical Reasoning": False</li> </ul>  | <p>Dependencies:</p> <ul style="list-style-type: none"> <li>"Contains(Inductive Reasoning, Analogy)": False</li> <li>"Contains(Inductive Reasoning, Casual Reasoning)": False</li> <li>"Contains(Inductive Reasoning, Generalization)": False</li> <li>"Contains(Inductive Reasoning, Predictive Reasoning)": False</li> <li>"Contains(Inductive Reasoning, Sample Reasoning)": False</li> <li>"Contains(Inductive Reasoning, Statistical Reasoning)": False</li> </ul> | <p>1-GED: 0.14</p> <p>Segments: 48</p> <p>Readability: 1.00</p> <p>MMMG: 0.14</p> |
| <p>Seed-X</p>         |  | <p>Entities:</p> <ul style="list-style-type: none"> <li>"Analogy": False</li> <li>"Casual Reasoning": False</li> <li>"Generalization": False</li> <li>"Inductive Reasoning": False</li> <li>"Predictive Reasoning": False</li> <li>"Sample Reasoning": False</li> <li>"Statistical Reasoning": False</li> </ul> | <p>Dependencies:</p> <ul style="list-style-type: none"> <li>"Contains(Inductive Reasoning, Analogy)": False</li> <li>"Contains(Inductive Reasoning, Casual Reasoning)": False</li> <li>"Contains(Inductive Reasoning, Generalization)": False</li> <li>"Contains(Inductive Reasoning, Predictive Reasoning)": False</li> <li>"Contains(Inductive Reasoning, Sample Reasoning)": False</li> <li>"Contains(Inductive Reasoning, Statistical Reasoning)": False</li> </ul> | <p>1-GED: 0.00</p> <p>Segments: 55</p> <p>Readability: 1.00</p> <p>MMMG: 0.00</p> |

Figure 40: MMMG Benchmark visualization for seven representative models on a Highschool-Philosophy example. Each row corresponds to one model and, from left to right, displays the generated image, its segmentation map, the reconstructed knowledge graph, the extracted entity and dependency lists, and finally the overall MMMG-Score along with its component sub-scores.

## F.4.10 Literature

Question: Visualize a flowchart outlining the different genres of literature and their defining features.

| Model            | Generated Image | Segmentation Map | Reconstructed Knowledge Graph | Entities                                                                                                                                                                                                                                                                                               | Dependencies                                                                                                                                                                                                                                                                                               | 1-GED | Segments | Readability | MMMG |
|------------------|-----------------|------------------|-------------------------------|--------------------------------------------------------------------------------------------------------------------------------------------------------------------------------------------------------------------------------------------------------------------------------------------------------|------------------------------------------------------------------------------------------------------------------------------------------------------------------------------------------------------------------------------------------------------------------------------------------------------------|-------|----------|-------------|------|
| GPT-4o           |                 |                  |                               | <p>Entities:</p> <ul style="list-style-type: none"> <li>'defining features': True</li> <li>'drama': True</li> <li>'fiction': True</li> <li>'flowchart': True</li> <li>'genres of literature': True</li> <li>'non-fiction': True</li> <li>'poetry': False</li> <li>'sub-genres': False</li> </ul>       | <p>Dependencies:</p> <ul style="list-style-type: none"> <li>'contains(flowchart, genres of literature)': True</li> <li>'contains(genres of literature, fiction)': True</li> <li>'contains(genres of literature, non-fiction)': True</li> <li>'contains(genres of literature, poetry)': False</li> </ul>    | 0.76  | 13       | 1.00        | 0.76 |
| FLUX-Reason (R1) |                 |                  |                               | <p>Entities:</p> <ul style="list-style-type: none"> <li>'defining features': False</li> <li>'drama': False</li> <li>'fiction': False</li> <li>'flowchart': True</li> <li>'genres of literature': True</li> <li>'non-fiction': True</li> <li>'poetry': True</li> <li>'sub-genres': False</li> </ul>     | <p>Dependencies:</p> <ul style="list-style-type: none"> <li>'contains(flowchart, genres of literature)': True</li> <li>'contains(genres of literature, fiction)': False</li> <li>'contains(genres of literature, non-fiction)': True</li> <li>'contains(genres of literature, poetry)': True</li> </ul>    | 0.63  | 10       | 1.00        | 0.63 |
| HiDream-11-full  |                 |                  |                               | <p>Entities:</p> <ul style="list-style-type: none"> <li>'defining features': True</li> <li>'drama': False</li> <li>'fiction': False</li> <li>'flowchart': True</li> <li>'genres of literature': True</li> <li>'non-fiction': False</li> <li>'poetry': False</li> <li>'sub-genres': False</li> </ul>    | <p>Dependencies:</p> <ul style="list-style-type: none"> <li>'contains(flowchart, genres of literature)': True</li> <li>'contains(genres of literature, fiction)': False</li> <li>'contains(genres of literature, non-fiction)': False</li> <li>'contains(genres of literature, poetry)': False</li> </ul>  | 0.38  | 26       | 1.00        | 0.38 |
| FLUX1-[pro]      |                 |                  |                               | <p>Entities:</p> <ul style="list-style-type: none"> <li>'defining features': False</li> <li>'drama': False</li> <li>'fiction': False</li> <li>'flowchart': True</li> <li>'genres of literature': True</li> <li>'non-fiction': False</li> <li>'poetry': False</li> <li>'sub-genres': False</li> </ul>   | <p>Dependencies:</p> <ul style="list-style-type: none"> <li>'contains(flowchart, genres of literature)': True</li> <li>'contains(genres of literature, fiction)': False</li> <li>'contains(genres of literature, non-fiction)': False</li> <li>'contains(genres of literature, poetry)': False</li> </ul>  | 0.27  | 39       | 1.00        | 0.27 |
| Ideogram V2      |                 |                  |                               | <p>Entities:</p> <ul style="list-style-type: none"> <li>'defining features': False</li> <li>'drama': False</li> <li>'fiction': False</li> <li>'flowchart': True</li> <li>'genres of literature': False</li> <li>'non-fiction': False</li> <li>'poetry': False</li> <li>'sub-genres': False</li> </ul>  | <p>Dependencies:</p> <ul style="list-style-type: none"> <li>'contains(flowchart, genres of literature)': False</li> <li>'contains(genres of literature, fiction)': False</li> <li>'contains(genres of literature, non-fiction)': False</li> <li>'contains(genres of literature, poetry)': False</li> </ul> | 0.15  | 129      | 0.34        | 0.05 |
| Infinity-BB      |                 |                  |                               | <p>Entities:</p> <ul style="list-style-type: none"> <li>'defining features': False</li> <li>'drama': False</li> <li>'fiction': False</li> <li>'flowchart': True</li> <li>'genres of literature': False</li> <li>'non-fiction': False</li> <li>'poetry': False</li> <li>'sub-genres': False</li> </ul>  | <p>Dependencies:</p> <ul style="list-style-type: none"> <li>'contains(flowchart, genres of literature)': False</li> <li>'contains(genres of literature, fiction)': False</li> <li>'contains(genres of literature, non-fiction)': False</li> <li>'contains(genres of literature, poetry)': False</li> </ul> | 0.15  | 105      | 0.61        | 0.09 |
| Seed-X           |                 |                  |                               | <p>Entities:</p> <ul style="list-style-type: none"> <li>'defining features': False</li> <li>'drama': False</li> <li>'fiction': False</li> <li>'flowchart': False</li> <li>'genres of literature': False</li> <li>'non-fiction': False</li> <li>'poetry': False</li> <li>'sub-genres': False</li> </ul> | <p>Dependencies:</p> <ul style="list-style-type: none"> <li>'contains(flowchart, genres of literature)': False</li> <li>'contains(genres of literature, fiction)': False</li> <li>'contains(genres of literature, non-fiction)': False</li> <li>'contains(genres of literature, poetry)': False</li> </ul> | 0.00  | 43       | 1.00        | 0.00 |

Figure 41: MMMG Benchmark visualization for seven representative models on a Highschool-Literature example. Each row corresponds to one model and, from left to right, displays the generated image, its segmentation map, the reconstructed knowledge graph, the extracted entity and dependency lists, and finally the overall MMMG-Score along with its component sub-scores.

## F.5 Undergraduate

### F.5.1 Biology

Question: Visualize an infographic explaining the mechanisms of horizontal gene transfer.

|                                                                                                          |                                                                                     |                                                                                     |                                                                                                                                                                                                                                                                                                                                                                                                                 |                                                                                                                                                                                                                                                                                                                                                                                                                                                                                                                                                                                                                             |                                                                                                            |
|----------------------------------------------------------------------------------------------------------|-------------------------------------------------------------------------------------|-------------------------------------------------------------------------------------|-----------------------------------------------------------------------------------------------------------------------------------------------------------------------------------------------------------------------------------------------------------------------------------------------------------------------------------------------------------------------------------------------------------------|-----------------------------------------------------------------------------------------------------------------------------------------------------------------------------------------------------------------------------------------------------------------------------------------------------------------------------------------------------------------------------------------------------------------------------------------------------------------------------------------------------------------------------------------------------------------------------------------------------------------------------|------------------------------------------------------------------------------------------------------------|
| <p>GPT-4o</p> 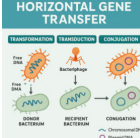          |    |    | <p>Entities:<br/>           "bacterial DNA": True<br/>           "conjugation": True<br/>           "donor cell": True<br/>           "foreign genetic material": True<br/>           "horizontal gene transfer": True<br/>           "plasmid": True<br/>           "recipient cell": True<br/>           "transduction": True<br/>           "transformation": True<br/>           "virus": True</p>          | <p>Dependencies:<br/>           "causes(transduction, bacterial DNA)": True<br/>           "causes(transduction, virus)": False<br/>           "causes(transformation, foreign genetic material)": True<br/>           "contains(horizontal gene transfer, conjugation)": True<br/>           "contains(horizontal gene transfer, transduction)": True<br/>           "contains(horizontal gene transfer, transformation)": True<br/>           "requires(conjugation, donor cell)": True<br/>           "requires(conjugation, plasmid)": True<br/>           "requires(transformation, recipient cell)": True</p>         | <p>1-GED: 0.97<br/>           Segments: 31<br/>           Readability: 1.00<br/>           MMMG: 0.97</p>  |
| <p>FLUX-Reason (R)</p>  |    |    | <p>Entities:<br/>           "bacterial DNA": False<br/>           "conjugation": False<br/>           "donor cell": False<br/>           "foreign genetic material": False<br/>           "horizontal gene transfer": True<br/>           "plasmid": True<br/>           "recipient cell": False<br/>           "transduction": False<br/>           "transformation": True<br/>           "virus": True</p>    | <p>Dependencies:<br/>           "causes(transduction, bacterial DNA)": False<br/>           "causes(transduction, virus)": False<br/>           "causes(transformation, foreign genetic material)": True<br/>           "contains(horizontal gene transfer, conjugation)": False<br/>           "contains(horizontal gene transfer, transduction)": False<br/>           "contains(horizontal gene transfer, transformation)": True<br/>           "requires(conjugation, donor cell)": False<br/>           "requires(conjugation, plasmid)": False<br/>           "requires(transformation, recipient cell)": False</p>   | <p>1-GED: 0.33<br/>           Segments: 29<br/>           Readability: 1.00<br/>           MMMG: 0.33</p>  |
| <p>HiDream-ll-full</p>  |    |    | <p>Entities:<br/>           "bacterial DNA": False<br/>           "conjugation": False<br/>           "donor cell": False<br/>           "foreign genetic material": False<br/>           "horizontal gene transfer": True<br/>           "plasmid": False<br/>           "recipient cell": False<br/>           "transduction": False<br/>           "transformation": False<br/>           "virus": False</p> | <p>Dependencies:<br/>           "causes(transduction, bacterial DNA)": False<br/>           "causes(transduction, virus)": False<br/>           "causes(transformation, foreign genetic material)": False<br/>           "contains(horizontal gene transfer, conjugation)": False<br/>           "contains(horizontal gene transfer, transduction)": False<br/>           "contains(horizontal gene transfer, transformation)": False<br/>           "requires(conjugation, donor cell)": False<br/>           "requires(conjugation, plasmid)": False<br/>           "requires(transformation, recipient cell)": False</p> | <p>1-GED: 0.10<br/>           Segments: 25<br/>           Readability: 1.00<br/>           MMMG: 0.10</p>  |
| <p>FLUX1-[pro]</p>     |   |   | <p>Entities:<br/>           "bacterial DNA": False<br/>           "conjugation": False<br/>           "donor cell": False<br/>           "foreign genetic material": False<br/>           "horizontal gene transfer": True<br/>           "plasmid": False<br/>           "recipient cell": False<br/>           "transduction": False<br/>           "transformation": False<br/>           "virus": True</p>  | <p>Dependencies:<br/>           "causes(transduction, bacterial DNA)": False<br/>           "causes(transduction, virus)": False<br/>           "causes(transformation, foreign genetic material)": False<br/>           "contains(horizontal gene transfer, conjugation)": False<br/>           "contains(horizontal gene transfer, transduction)": False<br/>           "contains(horizontal gene transfer, transformation)": False<br/>           "requires(conjugation, donor cell)": False<br/>           "requires(conjugation, plasmid)": False<br/>           "requires(transformation, recipient cell)": False</p> | <p>1-GED: 0.19<br/>           Segments: 66<br/>           Readability: 1.00<br/>           MMMG: 0.19</p>  |
| <p>Ideogram V2</p>    |  |  | <p>Entities:<br/>           "bacterial DNA": True<br/>           "conjugation": True<br/>           "donor cell": False<br/>           "foreign genetic material": False<br/>           "horizontal gene transfer": True<br/>           "plasmid": False<br/>           "recipient cell": False<br/>           "transduction": False<br/>           "transformation": False<br/>           "virus": True</p>    | <p>Dependencies:<br/>           "causes(transduction, bacterial DNA)": False<br/>           "causes(transduction, virus)": False<br/>           "causes(transformation, foreign genetic material)": False<br/>           "contains(horizontal gene transfer, conjugation)": True<br/>           "contains(horizontal gene transfer, transduction)": False<br/>           "contains(horizontal gene transfer, transformation)": False<br/>           "requires(conjugation, donor cell)": False<br/>           "requires(conjugation, plasmid)": False<br/>           "requires(transformation, recipient cell)": False</p>  | <p>1-GED: 0.33<br/>           Segments: 147<br/>           Readability: 0.14<br/>           MMMG: 0.05</p> |
| <p>Infinity-BB</p>    |  |  | <p>Entities:<br/>           "bacterial DNA": True<br/>           "conjugation": True<br/>           "donor cell": True<br/>           "foreign genetic material": True<br/>           "horizontal gene transfer": True<br/>           "plasmid": True<br/>           "recipient cell": True<br/>           "transduction": True<br/>           "transformation": True<br/>           "virus": True</p>          | <p>Dependencies:<br/>           "causes(transduction, bacterial DNA)": True<br/>           "causes(transduction, virus)": True<br/>           "causes(transformation, foreign genetic material)": True<br/>           "contains(horizontal gene transfer, conjugation)": True<br/>           "contains(horizontal gene transfer, transduction)": True<br/>           "contains(horizontal gene transfer, transformation)": True<br/>           "requires(conjugation, donor cell)": True<br/>           "requires(conjugation, plasmid)": True<br/>           "requires(transformation, recipient cell)": True</p>          | <p>1-GED: 1.00<br/>           Segments: 123<br/>           Readability: 0.41<br/>           MMMG: 0.41</p> |
| <p>Seed-X</p>         |  |  | <p>Entities:<br/>           "bacterial DNA": True<br/>           "conjugation": True<br/>           "donor cell": True<br/>           "foreign genetic material": True<br/>           "horizontal gene transfer": True<br/>           "plasmid": True<br/>           "recipient cell": True<br/>           "transduction": True<br/>           "transformation": True<br/>           "virus": True</p>          | <p>Dependencies:<br/>           "causes(transduction, bacterial DNA)": True<br/>           "causes(transduction, virus)": False<br/>           "causes(transformation, foreign genetic material)": True<br/>           "contains(horizontal gene transfer, conjugation)": True<br/>           "contains(horizontal gene transfer, transduction)": True<br/>           "contains(horizontal gene transfer, transformation)": True<br/>           "requires(conjugation, donor cell)": True<br/>           "requires(conjugation, plasmid)": True<br/>           "requires(transformation, recipient cell)": True</p>         | <p>1-GED: 0.97<br/>           Segments: 143<br/>           Readability: 0.19<br/>           MMMG: 0.18</p> |

Figure 42: MMMG Benchmark visualization for seven representative models on a Undergraduate-Biology example. Each row corresponds to one model and, from left to right, displays the generated image, its segmentation map, the reconstructed knowledge graph, the extracted entity and dependency lists, and finally the overall MMMG-Score along with its component sub-scores.

## F.5.2 Chemistry

Question: Design a diagram illustrating the Haber process for ammonia synthesis, highlighting reactants and conditions.

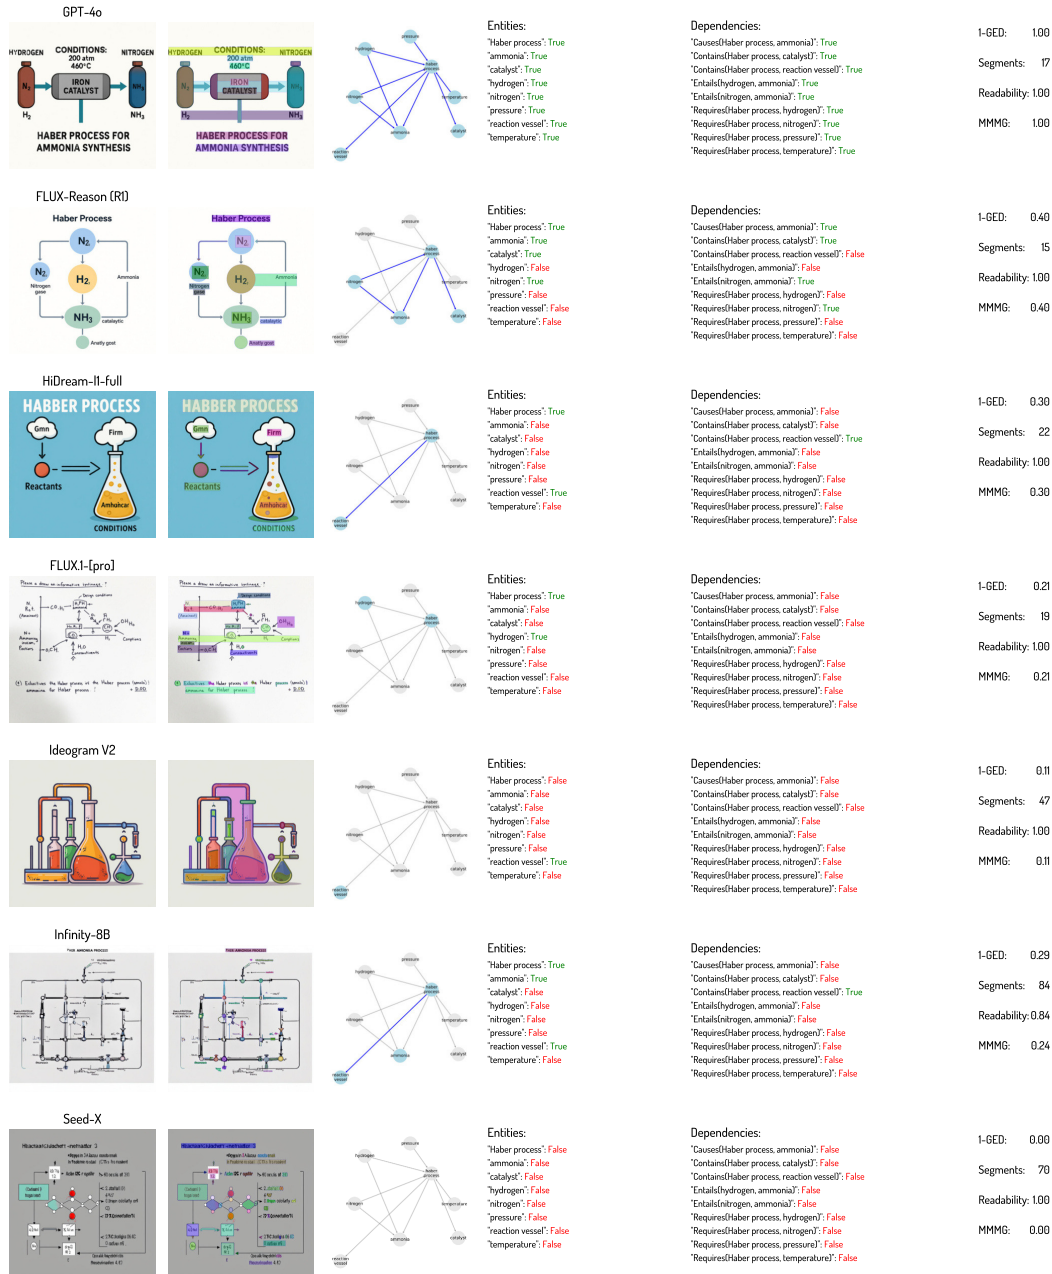

Figure 43: MMMG Benchmark visualization for seven representative models on a Undergraduate-Chemistry example. Each row corresponds to one model and, from left to right, displays the generated image, its segmentation map, the reconstructed knowledge graph, the extracted entity and dependency lists, and finally the overall MMMG-Score along with its component sub-scores.

### F.5.3 Mathematics

Question: Visualize a diagram showing the relationship between the areas under curves and definite integrals, accompanied by illustrative examples.

|                                                                                                                  |                                                                                     |                                                                                     |                                                                                                                                                                                                                                                                   |                                                                                                                                                                                                                                                                                                                                                                                                                                         |                                                                                    |
|------------------------------------------------------------------------------------------------------------------|-------------------------------------------------------------------------------------|-------------------------------------------------------------------------------------|-------------------------------------------------------------------------------------------------------------------------------------------------------------------------------------------------------------------------------------------------------------------|-----------------------------------------------------------------------------------------------------------------------------------------------------------------------------------------------------------------------------------------------------------------------------------------------------------------------------------------------------------------------------------------------------------------------------------------|------------------------------------------------------------------------------------|
| <p><b>GPT-4o</b></p> 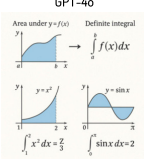           |    |    | <p><b>Entities:</b></p> <ul style="list-style-type: none"> <li>"area under curve": True</li> <li>"definite integral": True</li> <li>"function graph": True</li> <li>"illustrative example": True</li> <li>"x-axis": True</li> <li>"y-axis": True</li> </ul>       | <p><b>Dependencies:</b></p> <ul style="list-style-type: none"> <li>"Contains area under curve, definite integral": False</li> <li>"Contains illustrative example, area under curve": True</li> <li>"Entails function graph, area under curve": True</li> <li>"Requires definite integral, function graph": True</li> <li>"Requires definite integral, x-axis": True</li> <li>"Requires definite integral, y-axis": False</li> </ul>     | <p>1-GED: 0.91</p> <p>Segments: 22</p> <p>Readability: 1.00</p> <p>MMM-G: 0.91</p> |
| <p><b>FLUX-Reason (R1)</b></p>  |    |    | <p><b>Entities:</b></p> <ul style="list-style-type: none"> <li>"area under curve": False</li> <li>"definite integral": False</li> <li>"function graph": True</li> <li>"illustrative example": True</li> <li>"x-axis": True</li> <li>"y-axis": True</li> </ul>     | <p><b>Dependencies:</b></p> <ul style="list-style-type: none"> <li>"Contains area under curve, definite integral": False</li> <li>"Contains illustrative example, area under curve": False</li> <li>"Entails function graph, area under curve": False</li> <li>"Requires definite integral, function graph": False</li> <li>"Requires definite integral, x-axis": False</li> <li>"Requires definite integral, y-axis": False</li> </ul> | <p>1-GED: 0.50</p> <p>Segments: 23</p> <p>Readability: 1.00</p> <p>MMM-G: 0.50</p> |
| <p><b>HiDream-11-full</b></p>   |    |    | <p><b>Entities:</b></p> <ul style="list-style-type: none"> <li>"area under curve": True</li> <li>"definite integral": True</li> <li>"function graph": True</li> <li>"illustrative example": True</li> <li>"x-axis": True</li> <li>"y-axis": True</li> </ul>       | <p><b>Dependencies:</b></p> <ul style="list-style-type: none"> <li>"Contains area under curve, definite integral": False</li> <li>"Contains illustrative example, area under curve": False</li> <li>"Entails function graph, area under curve": False</li> <li>"Requires definite integral, function graph": False</li> <li>"Requires definite integral, x-axis": False</li> <li>"Requires definite integral, y-axis": False</li> </ul> | <p>1-GED: 0.74</p> <p>Segments: 21</p> <p>Readability: 1.00</p> <p>MMM-G: 0.74</p> |
| <p><b>FLUX1-[pro]</b></p>      |   |   | <p><b>Entities:</b></p> <ul style="list-style-type: none"> <li>"area under curve": False</li> <li>"definite integral": False</li> <li>"function graph": True</li> <li>"illustrative example": True</li> <li>"x-axis": True</li> <li>"y-axis": False</li> </ul>    | <p><b>Dependencies:</b></p> <ul style="list-style-type: none"> <li>"Contains area under curve, definite integral": False</li> <li>"Contains illustrative example, area under curve": False</li> <li>"Entails function graph, area under curve": False</li> <li>"Requires definite integral, function graph": False</li> <li>"Requires definite integral, x-axis": False</li> <li>"Requires definite integral, y-axis": False</li> </ul> | <p>1-GED: 0.40</p> <p>Segments: -5</p> <p>Readability: 1.00</p> <p>MMM-G: 0.40</p> |
| <p><b>Ideogram V2</b></p>     |  |  | <p><b>Entities:</b></p> <ul style="list-style-type: none"> <li>"area under curve": False</li> <li>"definite integral": False</li> <li>"function graph": False</li> <li>"illustrative example": False</li> <li>"x-axis": False</li> <li>"y-axis": False</li> </ul> | <p><b>Dependencies:</b></p> <ul style="list-style-type: none"> <li>"Contains area under curve, definite integral": False</li> <li>"Contains illustrative example, area under curve": False</li> <li>"Entails function graph, area under curve": False</li> <li>"Requires definite integral, function graph": False</li> <li>"Requires definite integral, x-axis": False</li> <li>"Requires definite integral, y-axis": False</li> </ul> | <p>1-GED: 0.00</p> <p>Segments: 36</p> <p>Readability: 1.00</p> <p>MMM-G: 0.00</p> |
| <p><b>Infinity-BB</b></p>     |  |  | <p><b>Entities:</b></p> <ul style="list-style-type: none"> <li>"area under curve": False</li> <li>"definite integral": False</li> <li>"function graph": True</li> <li>"illustrative example": False</li> <li>"x-axis": False</li> <li>"y-axis": True</li> </ul>   | <p><b>Dependencies:</b></p> <ul style="list-style-type: none"> <li>"Contains area under curve, definite integral": False</li> <li>"Contains illustrative example, area under curve": False</li> <li>"Entails function graph, area under curve": False</li> <li>"Requires definite integral, function graph": False</li> <li>"Requires definite integral, x-axis": False</li> <li>"Requires definite integral, y-axis": False</li> </ul> | <p>1-GED: 0.29</p> <p>Segments: 49</p> <p>Readability: 1.00</p> <p>MMM-G: 0.29</p> |
| <p><b>Seed-X</b></p>          |  |  | <p><b>Entities:</b></p> <ul style="list-style-type: none"> <li>"area under curve": False</li> <li>"definite integral": False</li> <li>"function graph": True</li> <li>"illustrative example": True</li> <li>"x-axis": True</li> <li>"y-axis": True</li> </ul>     | <p><b>Dependencies:</b></p> <ul style="list-style-type: none"> <li>"Contains area under curve, definite integral": False</li> <li>"Contains illustrative example, area under curve": False</li> <li>"Entails function graph, area under curve": False</li> <li>"Requires definite integral, function graph": False</li> <li>"Requires definite integral, x-axis": False</li> <li>"Requires definite integral, y-axis": False</li> </ul> | <p>1-GED: 0.50</p> <p>Segments: 54</p> <p>Readability: 1.00</p> <p>MMM-G: 0.50</p> |

Figure 44: MMMG Benchmark visualization for seven representative models on a Undergraduate-Mathematics example. Each row corresponds to one model and, from left to right, displays the generated image, its segmentation map, the reconstructed knowledge graph, the extracted entity and dependency lists, and finally the overall MMMG-Score along with its component sub-scores.

## F.5.4 Engineering

Question: Visualize a PDF render of the stress-strain curve and its significance in material science.

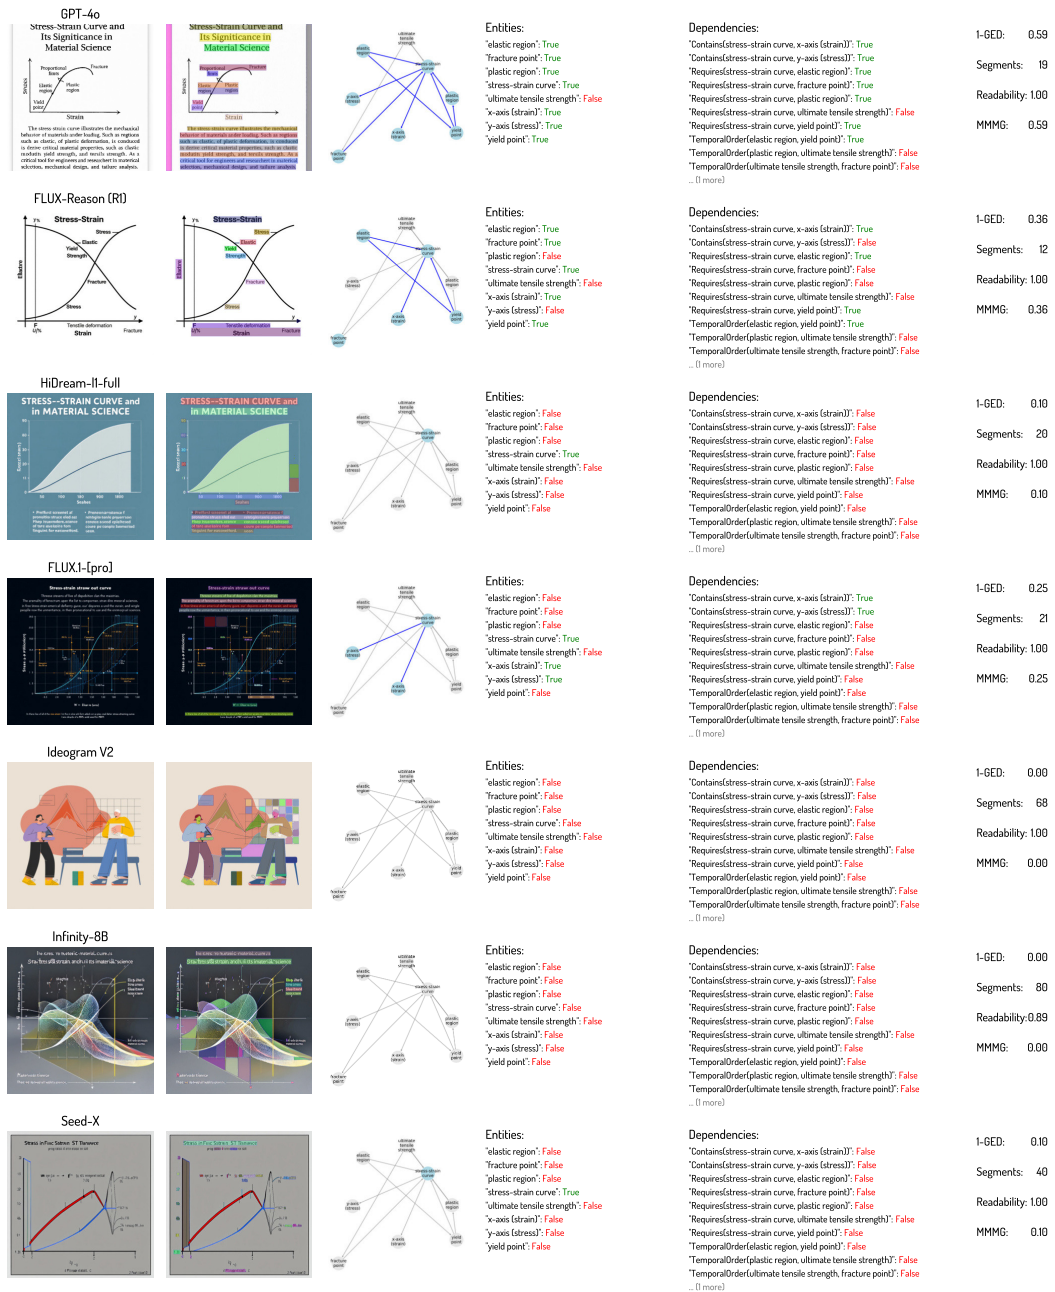

Figure 45: MMMG Benchmark visualization for seven representative models on a Undergraduate-Engineering example. Each row corresponds to one model and, from left to right, displays the generated image, its segmentation map, the reconstructed knowledge graph, the extracted entity and dependency lists, and finally the overall MMMG-Score along with its component sub-scores.

## F.5.5 Geography

Question: Create a diagram showing the process of glacial erosion, illustrating features such as fjords and U-shaped valleys.

|                                                                                                           |                                                                                     |                                                                                     |                                                                                                                                                                                                                                          |                                                                                                                                                                                                                                                                                                                                                  |                                                                                   |
|-----------------------------------------------------------------------------------------------------------|-------------------------------------------------------------------------------------|-------------------------------------------------------------------------------------|------------------------------------------------------------------------------------------------------------------------------------------------------------------------------------------------------------------------------------------|--------------------------------------------------------------------------------------------------------------------------------------------------------------------------------------------------------------------------------------------------------------------------------------------------------------------------------------------------|-----------------------------------------------------------------------------------|
| <p>GPT-4o</p> 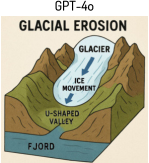           |    |    | <p>Entities:</p> <ul style="list-style-type: none"> <li>"U-shaped valley": True</li> <li>"fjord": True</li> <li>"glacial erosion": True</li> <li>"glacier": True</li> <li>"landscape": True</li> <li>"rock debris": False</li> </ul>     | <p>Dependencies:</p> <ul style="list-style-type: none"> <li>"causes(glacier, glacial erosion)": True</li> <li>"contains(glacial erosion, U-shaped valley)": True</li> <li>"contains(glacial erosion, fjord)": True</li> <li>"contains(glacial erosion, rock debris)": False</li> <li>"requires(glacial erosion, landscape)": False</li> </ul>    | <p>I-GED: 0.84</p> <p>Segments: 19</p> <p>Readability: 1.00</p> <p>MMMG: 0.84</p> |
| <p>FLUX-Reason (R1)</p>  |    |    | <p>Entities:</p> <ul style="list-style-type: none"> <li>"U-shaped valley": True</li> <li>"fjord": True</li> <li>"glacial erosion": False</li> <li>"glacier": True</li> <li>"landscape": True</li> <li>"rock debris": False</li> </ul>    | <p>Dependencies:</p> <ul style="list-style-type: none"> <li>"causes(glacier, glacial erosion)": False</li> <li>"contains(glacial erosion, U-shaped valley)": False</li> <li>"contains(glacial erosion, fjord)": False</li> <li>"contains(glacial erosion, rock debris)": False</li> <li>"requires(glacial erosion, landscape)": False</li> </ul> | <p>I-GED: 0.53</p> <p>Segments: 38</p> <p>Readability: 1.00</p> <p>MMMG: 0.53</p> |
| <p>HiDream-11-full</p>   |    |    | <p>Entities:</p> <ul style="list-style-type: none"> <li>"U-shaped valley": True</li> <li>"fjord": True</li> <li>"glacial erosion": False</li> <li>"glacier": False</li> <li>"landscape": True</li> <li>"rock debris": False</li> </ul>   | <p>Dependencies:</p> <ul style="list-style-type: none"> <li>"causes(glacier, glacial erosion)": False</li> <li>"contains(glacial erosion, U-shaped valley)": False</li> <li>"contains(glacial erosion, fjord)": False</li> <li>"contains(glacial erosion, rock debris)": False</li> <li>"requires(glacial erosion, landscape)": False</li> </ul> | <p>I-GED: 0.43</p> <p>Segments: 37</p> <p>Readability: 1.00</p> <p>MMMG: 0.43</p> |
| <p>FLUX1-[pro]</p>      |   |   | <p>Entities:</p> <ul style="list-style-type: none"> <li>"U-shaped valley": True</li> <li>"fjord": True</li> <li>"glacial erosion": False</li> <li>"glacier": False</li> <li>"landscape": True</li> <li>"rock debris": True</li> </ul>    | <p>Dependencies:</p> <ul style="list-style-type: none"> <li>"causes(glacier, glacial erosion)": False</li> <li>"contains(glacial erosion, U-shaped valley)": False</li> <li>"contains(glacial erosion, fjord)": False</li> <li>"contains(glacial erosion, rock debris)": False</li> <li>"requires(glacial erosion, landscape)": False</li> </ul> | <p>I-GED: 0.53</p> <p>Segments: 6</p> <p>Readability: 1.00</p> <p>MMMG: 0.53</p>  |
| <p>Ideogram V2</p>     |  |  | <p>Entities:</p> <ul style="list-style-type: none"> <li>"U-shaped valley": True</li> <li>"fjord": False</li> <li>"glacial erosion": False</li> <li>"glacier": True</li> <li>"landscape": True</li> <li>"rock debris": False</li> </ul>   | <p>Dependencies:</p> <ul style="list-style-type: none"> <li>"causes(glacier, glacial erosion)": False</li> <li>"contains(glacial erosion, U-shaped valley)": False</li> <li>"contains(glacial erosion, fjord)": False</li> <li>"contains(glacial erosion, rock debris)": False</li> <li>"requires(glacial erosion, landscape)": False</li> </ul> | <p>I-GED: 0.43</p> <p>Segments: 86</p> <p>Readability: 0.82</p> <p>MMMG: 0.35</p> |
| <p>Infinity-8B</p>     |  |  | <p>Entities:</p> <ul style="list-style-type: none"> <li>"U-shaped valley": True</li> <li>"fjord": True</li> <li>"glacial erosion": False</li> <li>"glacier": True</li> <li>"landscape": True</li> <li>"rock debris": False</li> </ul>    | <p>Dependencies:</p> <ul style="list-style-type: none"> <li>"causes(glacier, glacial erosion)": False</li> <li>"contains(glacial erosion, U-shaped valley)": False</li> <li>"contains(glacial erosion, fjord)": False</li> <li>"contains(glacial erosion, rock debris)": False</li> <li>"requires(glacial erosion, landscape)": False</li> </ul> | <p>I-GED: 0.53</p> <p>Segments: 33</p> <p>Readability: 1.00</p> <p>MMMG: 0.53</p> |
| <p>Seed-X</p>          |  |  | <p>Entities:</p> <ul style="list-style-type: none"> <li>"U-shaped valley": False</li> <li>"fjord": False</li> <li>"glacial erosion": False</li> <li>"glacier": False</li> <li>"landscape": True</li> <li>"rock debris": False</li> </ul> | <p>Dependencies:</p> <ul style="list-style-type: none"> <li>"causes(glacier, glacial erosion)": False</li> <li>"contains(glacial erosion, U-shaped valley)": False</li> <li>"contains(glacial erosion, fjord)": False</li> <li>"contains(glacial erosion, rock debris)": False</li> <li>"requires(glacial erosion, landscape)": False</li> </ul> | <p>I-GED: 0.17</p> <p>Segments: 32</p> <p>Readability: 1.00</p> <p>MMMG: 0.17</p> |

Figure 46: MMMG Benchmark visualization for seven representative models on a Undergraduate-Geography example. Each row corresponds to one model and, from left to right, displays the generated image, its segmentation map, the reconstructed knowledge graph, the extracted entity and dependency lists, and finally the overall MMMG-Score along with its component sub-scores.

## F.5.6 Economics

Question: Visualize the components and implications of the PESTEL framework in an educational poster format.

| Model            | Generated Image | Segmentation Map | Reconstructed Knowledge Graph | Entities                                                                                                                                                                  | Dependencies                                                                                                                                                                                                                                                                                                              | 1-GED | Segments | Readability | MMMG |
|------------------|-----------------|------------------|-------------------------------|---------------------------------------------------------------------------------------------------------------------------------------------------------------------------|---------------------------------------------------------------------------------------------------------------------------------------------------------------------------------------------------------------------------------------------------------------------------------------------------------------------------|-------|----------|-------------|------|
| GPT-4o           |                 |                  |                               | Entities:<br>'Economic': True<br>'Environmental': True<br>'Legal': False<br>'PESTEL Framework': True<br>'Political': True<br>'Social': True<br>'Technological': True      | Dependencies:<br>'Contains(PESTEL Framework, Economic)': True<br>'Contains(PESTEL Framework, Environmental)': True<br>'Contains(PESTEL Framework, Legal)': False<br>'Contains(PESTEL Framework, Political)': True<br>'Contains(PESTEL Framework, Social)': True<br>'Contains(PESTEL Framework, Technological)': True      | 0.50  | 40       | 1.00        | 0.50 |
| FLUX-Reason (R1) |                 |                  |                               | Entities:<br>'Economic': True<br>'Environmental': True<br>'Legal': True<br>'PESTEL Framework': True<br>'Political': True<br>'Social': True<br>'Technological': True       | Dependencies:<br>'Contains(PESTEL Framework, Economic)': True<br>'Contains(PESTEL Framework, Environmental)': True<br>'Contains(PESTEL Framework, Legal)': True<br>'Contains(PESTEL Framework, Political)': True<br>'Contains(PESTEL Framework, Social)': True<br>'Contains(PESTEL Framework, Technological)': True       | 1.00  | 24       | 1.00        | 1.00 |
| HiDream-11-full  |                 |                  |                               | Entities:<br>'Economic': False<br>'Environmental': False<br>'Legal': False<br>'PESTEL Framework': True<br>'Political': False<br>'Social': False<br>'Technological': False | Dependencies:<br>'Contains(PESTEL Framework, Economic)': False<br>'Contains(PESTEL Framework, Environmental)': False<br>'Contains(PESTEL Framework, Legal)': False<br>'Contains(PESTEL Framework, Political)': False<br>'Contains(PESTEL Framework, Social)': False<br>'Contains(PESTEL Framework, Technological)': False | 0.14  | 38       | 1.00        | 0.14 |
| FLUX1-[pro]      |                 |                  |                               | Entities:<br>'Economic': False<br>'Environmental': False<br>'Legal': False<br>'PESTEL Framework': True<br>'Political': False<br>'Social': False<br>'Technological': False | Dependencies:<br>'Contains(PESTEL Framework, Economic)': False<br>'Contains(PESTEL Framework, Environmental)': False<br>'Contains(PESTEL Framework, Legal)': False<br>'Contains(PESTEL Framework, Political)': False<br>'Contains(PESTEL Framework, Social)': False<br>'Contains(PESTEL Framework, Technological)': False | 0.14  | 13       | 1.00        | 0.14 |
| Ideogram V2      |                 |                  |                               | Entities:<br>'Economic': False<br>'Environmental': False<br>'Legal': False<br>'PESTEL Framework': True<br>'Political': False<br>'Social': False<br>'Technological': False | Dependencies:<br>'Contains(PESTEL Framework, Economic)': False<br>'Contains(PESTEL Framework, Environmental)': False<br>'Contains(PESTEL Framework, Legal)': False<br>'Contains(PESTEL Framework, Political)': False<br>'Contains(PESTEL Framework, Social)': False<br>'Contains(PESTEL Framework, Technological)': False | 0.14  | 171      | 0.00        | 0.00 |
| Infinity-8B      |                 |                  |                               | Entities:<br>'Economic': False<br>'Environmental': False<br>'Legal': False<br>'PESTEL Framework': True<br>'Political': False<br>'Social': False<br>'Technological': False | Dependencies:<br>'Contains(PESTEL Framework, Economic)': False<br>'Contains(PESTEL Framework, Environmental)': False<br>'Contains(PESTEL Framework, Legal)': False<br>'Contains(PESTEL Framework, Political)': False<br>'Contains(PESTEL Framework, Social)': False<br>'Contains(PESTEL Framework, Technological)': False | 0.14  | 74       | 0.96        | 0.14 |
| Seed-X           |                 |                  |                               | Entities:<br>'Economic': False<br>'Environmental': False<br>'Legal': False<br>'PESTEL Framework': True<br>'Political': False<br>'Social': False<br>'Technological': False | Dependencies:<br>'Contains(PESTEL Framework, Economic)': False<br>'Contains(PESTEL Framework, Environmental)': False<br>'Contains(PESTEL Framework, Legal)': False<br>'Contains(PESTEL Framework, Political)': False<br>'Contains(PESTEL Framework, Social)': False<br>'Contains(PESTEL Framework, Technological)': False | 0.14  | 68       | 1.00        | 0.14 |

Figure 47: MMMG Benchmark visualization for seven representative models on a Undergraduate-Economics example. Each row corresponds to one model and, from left to right, displays the generated image, its segmentation map, the reconstructed knowledge graph, the extracted entity and dependency lists, and finally the overall MMMG-Score along with its component sub-scores.

## F.5.7 Sociology

Question: Create an infographic illustrating the stages of cognitive development and their interrelations.

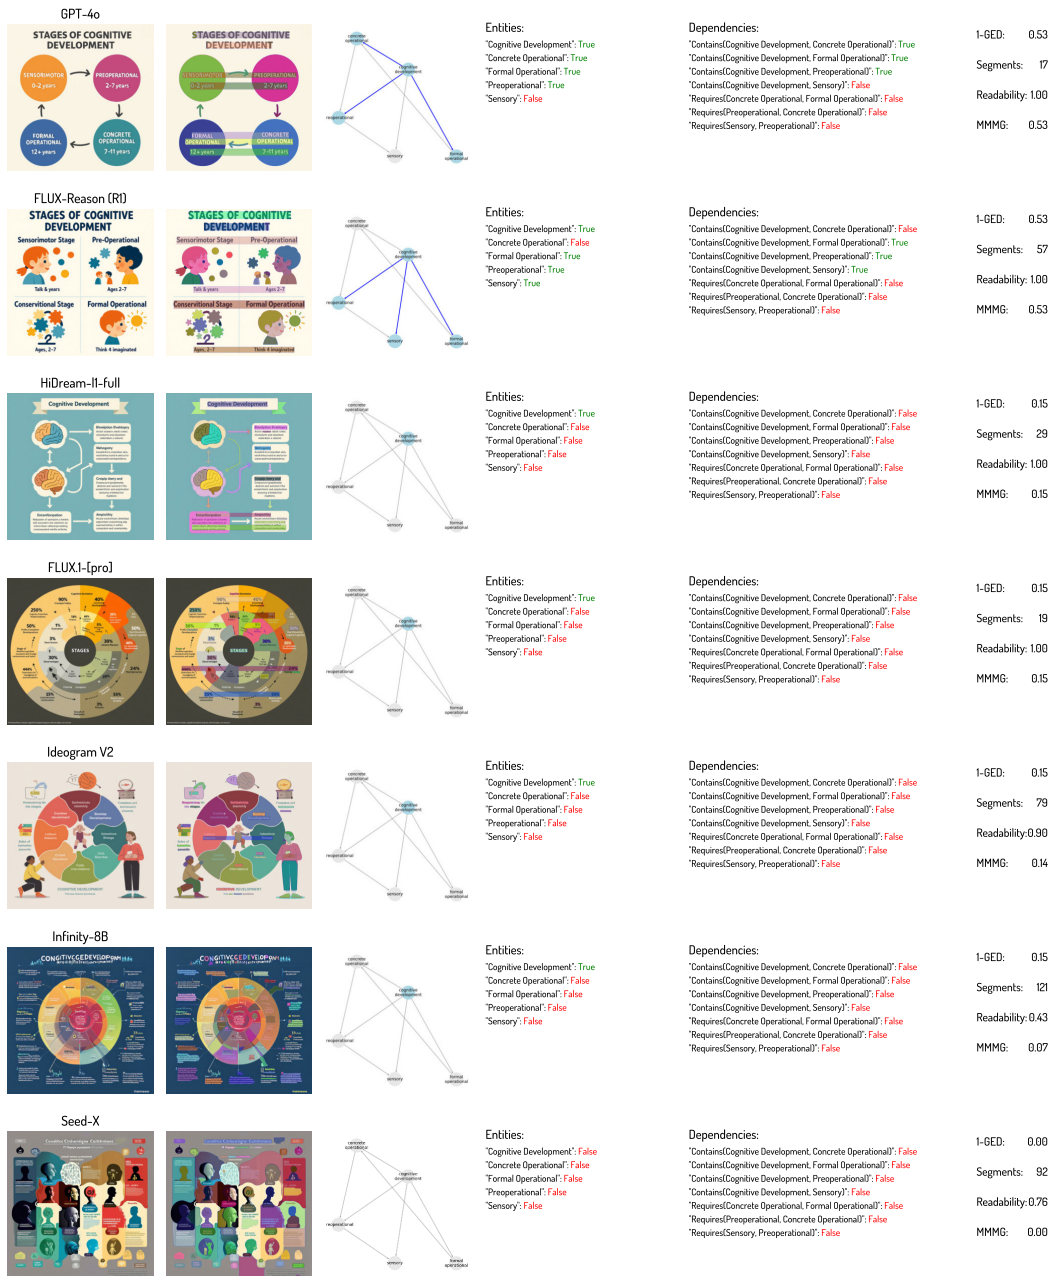

Figure 48: MMMG Benchmark visualization for seven representative models on a Undergraduate-Sociology example. Each row corresponds to one model and, from left to right, displays the generated image, its segmentation map, the reconstructed knowledge graph, the extracted entity and dependency lists, and finally the overall MMMG-Score along with its component sub-scores.

## F.5.8 History

Question: Create an educational poster on the significance of the Trail of Tears in U.S. history, emphasizing its impact on Native American communities.

| Model            | Generated Image | Segmentation Map | Reconstructed Knowledge Graph | Entities                                                                                                                                                                                                                                                                                  | Dependencies                                                                                                                                                                                                                                                                                                                                                                                                   | 1-GED       | Segments      | Readability       | MMMG       |
|------------------|-----------------|------------------|-------------------------------|-------------------------------------------------------------------------------------------------------------------------------------------------------------------------------------------------------------------------------------------------------------------------------------------|----------------------------------------------------------------------------------------------------------------------------------------------------------------------------------------------------------------------------------------------------------------------------------------------------------------------------------------------------------------------------------------------------------------|-------------|---------------|-------------------|------------|
| GPT-4o           |                 |                  |                               | <p>Entities:</p> <ul style="list-style-type: none"> <li>'Cultural impact': False</li> <li>'Forced relocation': True</li> <li>'Historical map': False</li> <li>'Native American communities': True</li> <li>'Suffering and resilience': True</li> <li>'Trail of Tears': True</li> </ul>    | <p>Dependencies:</p> <ul style="list-style-type: none"> <li>'Causes(Forced relocation, Suffering and resilience)': True</li> <li>'Contains(Trail of Tears, Historical map)': False</li> <li>'Defines(Trail of Tears, Forced relocation)': True</li> <li>'Entails(Forced relocation, Native American communities)': True</li> <li>'Requires(Cultural impact, Native American communities)': False</li> </ul>    | 1-GED: 0.50 | Segments: 28  | Readability: 100  | MMMG: 0.50 |
| FLUX-Reason (R0) |                 |                  |                               | <p>Entities:</p> <ul style="list-style-type: none"> <li>'Cultural impact': False</li> <li>'Forced relocation': True</li> <li>'Historical map': False</li> <li>'Native American communities': True</li> <li>'Suffering and resilience': False</li> <li>'Trail of Tears': True</li> </ul>   | <p>Dependencies:</p> <ul style="list-style-type: none"> <li>'Causes(Forced relocation, Suffering and resilience)': False</li> <li>'Contains(Trail of Tears, Historical map)': True</li> <li>'Defines(Trail of Tears, Forced relocation)': True</li> <li>'Entails(Forced relocation, Native American communities)': False</li> <li>'Requires(Cultural impact, Native American communities)': False</li> </ul>   | 1-GED: 0.42 | Segments: 55  | Readability: 100  | MMMG: 0.42 |
| HiDream-11-full  |                 |                  |                               | <p>Entities:</p> <ul style="list-style-type: none"> <li>'Cultural impact': False</li> <li>'Forced relocation': False</li> <li>'Historical map': False</li> <li>'Native American communities': True</li> <li>'Suffering and resilience': False</li> <li>'Trail of Tears': False</li> </ul> | <p>Dependencies:</p> <ul style="list-style-type: none"> <li>'Causes(Forced relocation, Suffering and resilience)': False</li> <li>'Contains(Trail of Tears, Historical map)': False</li> <li>'Defines(Trail of Tears, Forced relocation)': False</li> <li>'Entails(Forced relocation, Native American communities)': False</li> <li>'Requires(Cultural impact, Native American communities)': False</li> </ul> | 1-GED: 0.15 | Segments: 70  | Readability: 100  | MMMG: 0.15 |
| FLUX1-[pro]      |                 |                  |                               | <p>Entities:</p> <ul style="list-style-type: none"> <li>'Cultural impact': False</li> <li>'Forced relocation': False</li> <li>'Historical map': False</li> <li>'Native American communities': True</li> <li>'Suffering and resilience': False</li> <li>'Trail of Tears': False</li> </ul> | <p>Dependencies:</p> <ul style="list-style-type: none"> <li>'Causes(Forced relocation, Suffering and resilience)': False</li> <li>'Contains(Trail of Tears, Historical map)': False</li> <li>'Defines(Trail of Tears, Forced relocation)': False</li> <li>'Entails(Forced relocation, Native American communities)': False</li> <li>'Requires(Cultural impact, Native American communities)': False</li> </ul> | 1-GED: 0.15 | Segments: 61  | Readability: 100  | MMMG: 0.15 |
| Ideogram V2      |                 |                  |                               | <p>Entities:</p> <ul style="list-style-type: none"> <li>'Cultural impact': False</li> <li>'Forced relocation': False</li> <li>'Historical map': False</li> <li>'Native American communities': True</li> <li>'Suffering and resilience': False</li> <li>'Trail of Tears': True</li> </ul>  | <p>Dependencies:</p> <ul style="list-style-type: none"> <li>'Causes(Forced relocation, Suffering and resilience)': False</li> <li>'Contains(Trail of Tears, Historical map)': False</li> <li>'Defines(Trail of Tears, Forced relocation)': False</li> <li>'Entails(Forced relocation, Native American communities)': False</li> <li>'Requires(Cultural impact, Native American communities)': False</li> </ul> | 1-GED: 0.29 | Segments: 149 | Readability: 0.12 | MMMG: 0.03 |
| Infinity-BB      |                 |                  |                               | <p>Entities:</p> <ul style="list-style-type: none"> <li>'Cultural impact': False</li> <li>'Forced relocation': True</li> <li>'Historical map': True</li> <li>'Native American communities': True</li> <li>'Suffering and resilience': False</li> <li>'Trail of Tears': True</li> </ul>    | <p>Dependencies:</p> <ul style="list-style-type: none"> <li>'Causes(Forced relocation, Suffering and resilience)': False</li> <li>'Contains(Trail of Tears, Historical map)': True</li> <li>'Defines(Trail of Tears, Forced relocation)': False</li> <li>'Entails(Forced relocation, Native American communities)': True</li> <li>'Requires(Cultural impact, Native American communities)': False</li> </ul>   | 1-GED: 0.56 | Segments: 199 | Readability: 0.00 | MMMG: 0.00 |
| Seed-X           |                 |                  |                               | <p>Entities:</p> <ul style="list-style-type: none"> <li>'Cultural impact': False</li> <li>'Forced relocation': False</li> <li>'Historical map': False</li> <li>'Native American communities': True</li> <li>'Suffering and resilience': False</li> <li>'Trail of Tears': False</li> </ul> | <p>Dependencies:</p> <ul style="list-style-type: none"> <li>'Causes(Forced relocation, Suffering and resilience)': False</li> <li>'Contains(Trail of Tears, Historical map)': False</li> <li>'Defines(Trail of Tears, Forced relocation)': False</li> <li>'Entails(Forced relocation, Native American communities)': False</li> <li>'Requires(Cultural impact, Native American communities)': False</li> </ul> | 1-GED: 0.15 | Segments: 33  | Readability: 100  | MMMG: 0.15 |

Figure 49: MMMG Benchmark visualization for seven representative models on a Undergraduate-History example. Each row corresponds to one model and, from left to right, displays the generated image, its segmentation map, the reconstructed knowledge graph, the extracted entity and dependency lists, and finally the overall MMMG-Score along with its component sub-scores.

## F.5.9 Philosophy

Question: Visualize an infographic illustrating the levels of Maslow's Hierarchy of Needs and their interrelations.

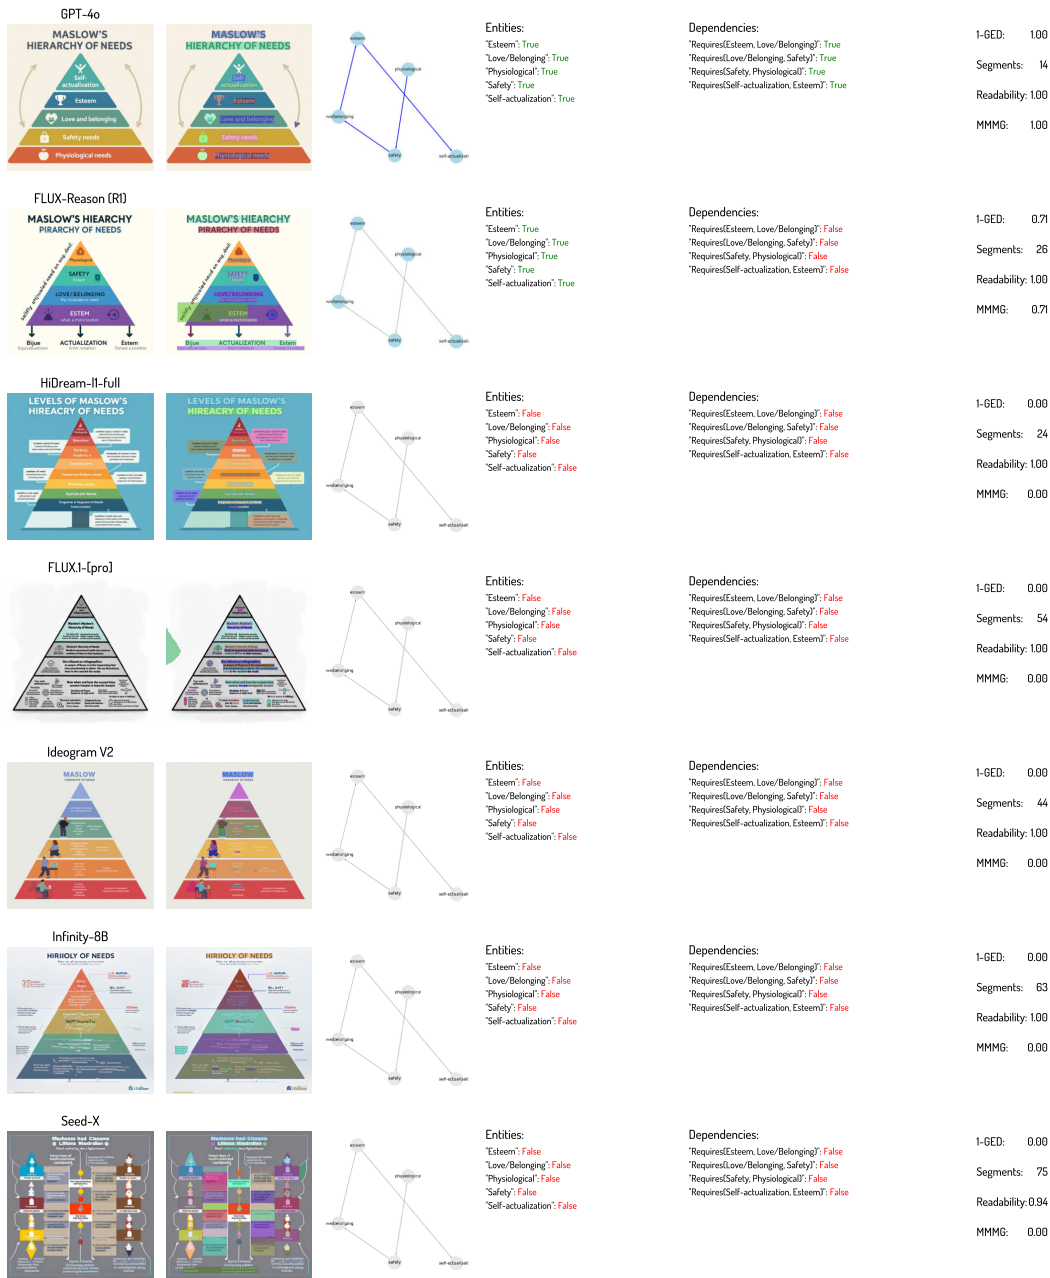

Figure 50: MMMG Benchmark visualization for seven representative models on a Undergraduate-Philosophy example. Each row corresponds to one model and, from left to right, displays the generated image, its segmentation map, the reconstructed knowledge graph, the extracted entity and dependency lists, and finally the overall MMMG-Score along with its component sub-scores.

## F.5.10 Literature

Question: Design an educational poster that illustrates the key elements of dystopian fiction using examples from literature.

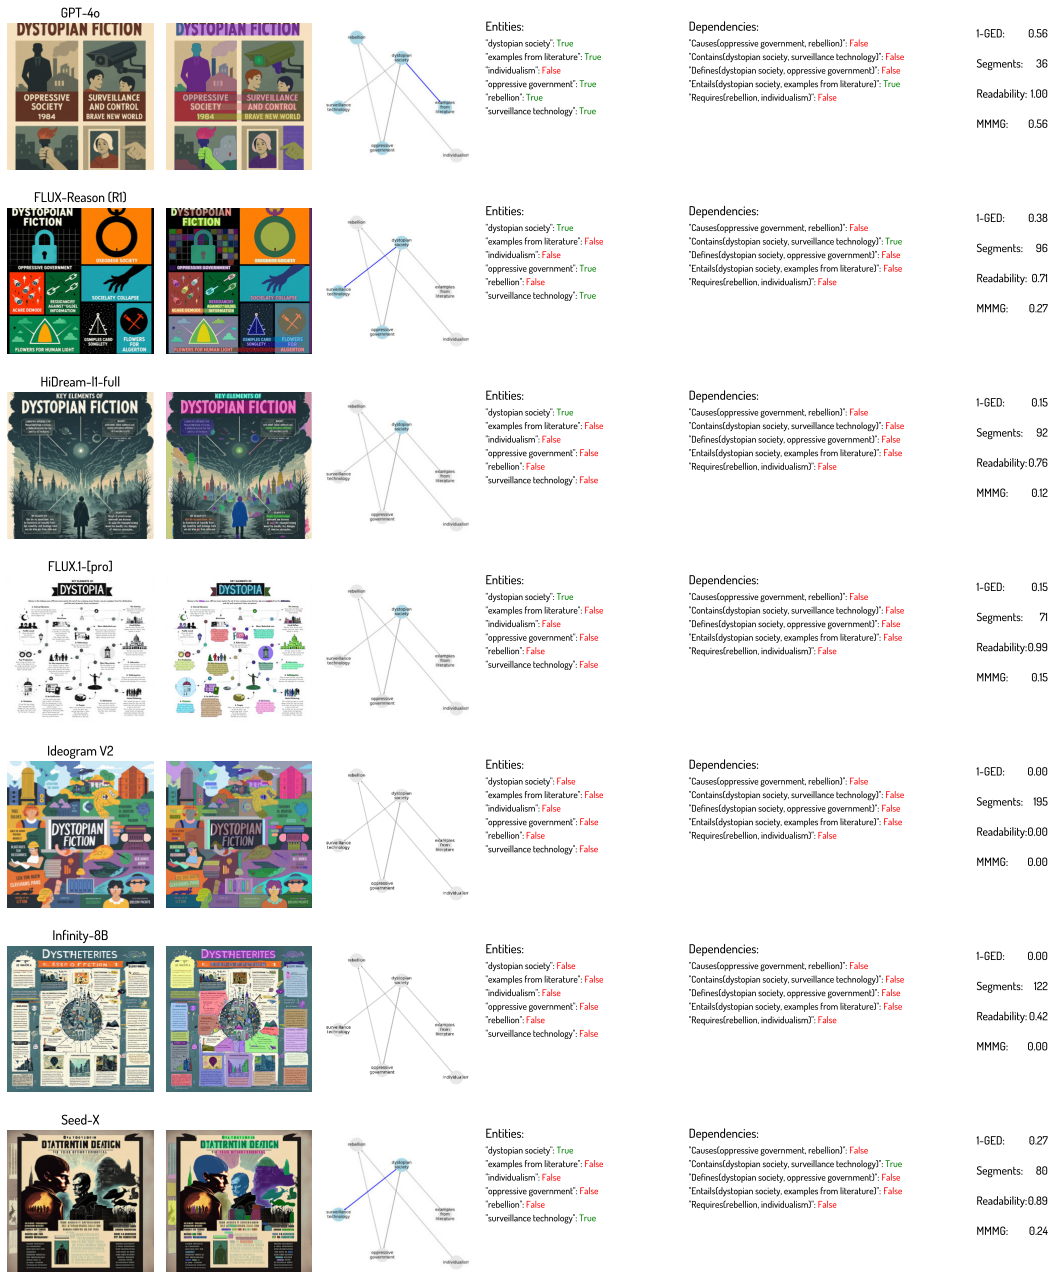

Figure 51: MMMG Benchmark visualization for seven representative models on a Undergraduate-Literature example. Each row corresponds to one model and, from left to right, displays the generated image, its segmentation map, the reconstructed knowledge graph, the extracted entity and dependency lists, and finally the overall MMMG-Score along with its component sub-scores.

## F.6 PhD

### F.6.1 Biology

Question: Visualize an infographic depicting the various methods of drug permeation enhancement through the skin.

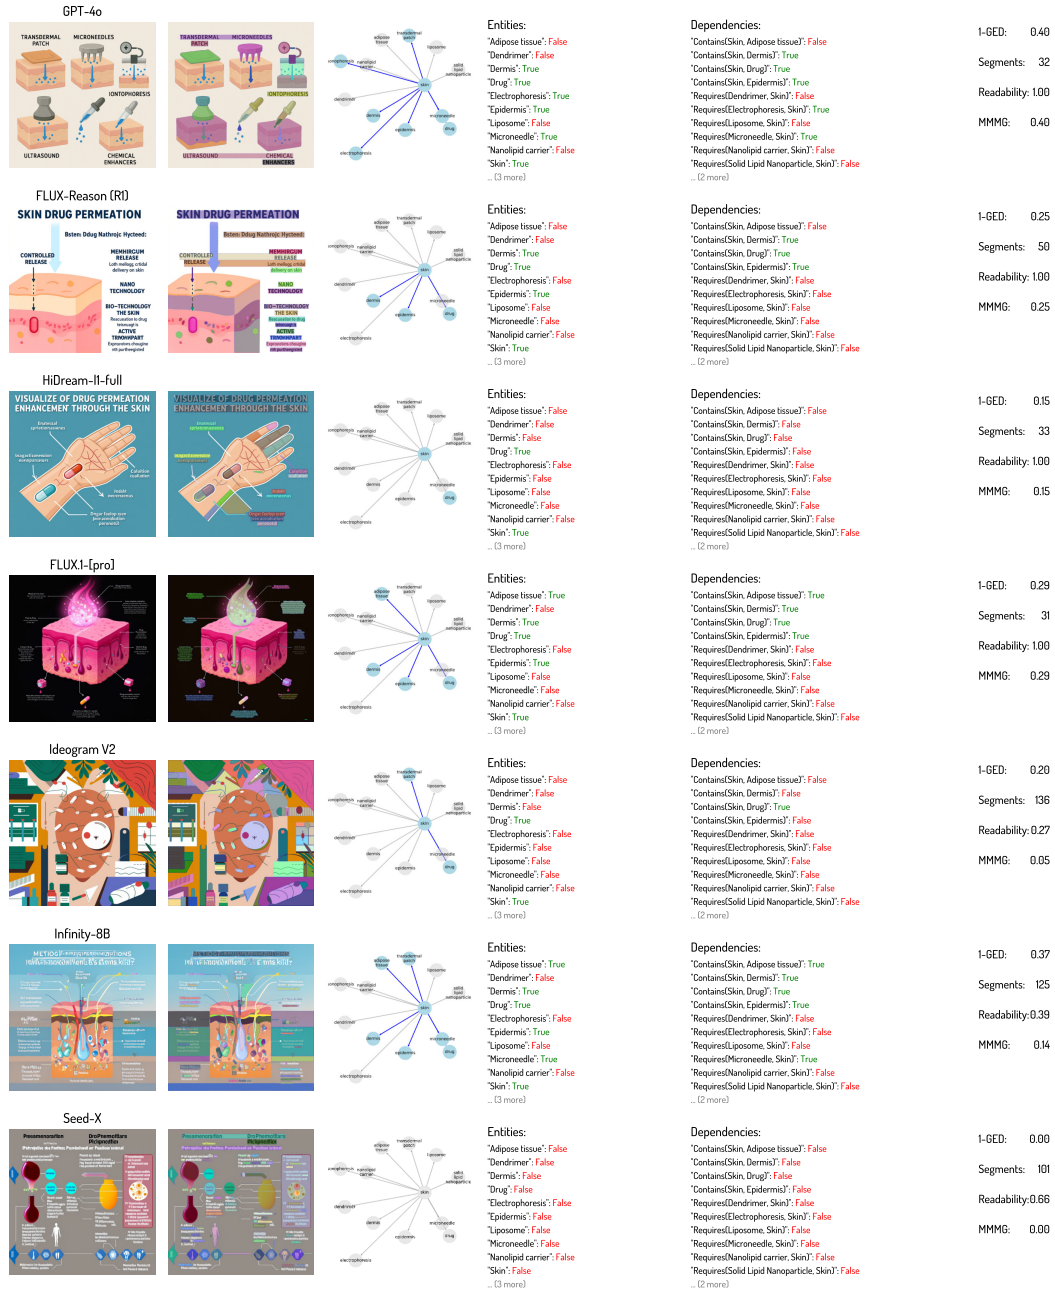

Figure 52: MMMG Benchmark visualization for seven representative models on a PhD-Biology example. Each row corresponds to one model and, from left to right, displays the generated image, its segmentation map, the reconstructed knowledge graph, the extracted entity and dependency lists, and finally the overall MMMG-Score along with its component sub-scores.

## F.6.2 Chemistry

Question: Visualize the process of synthesizing mesoporous silica nanoparticles (MSNs) through surfactant self-assembly and co-assembly with silica precursors in an educational poster format.

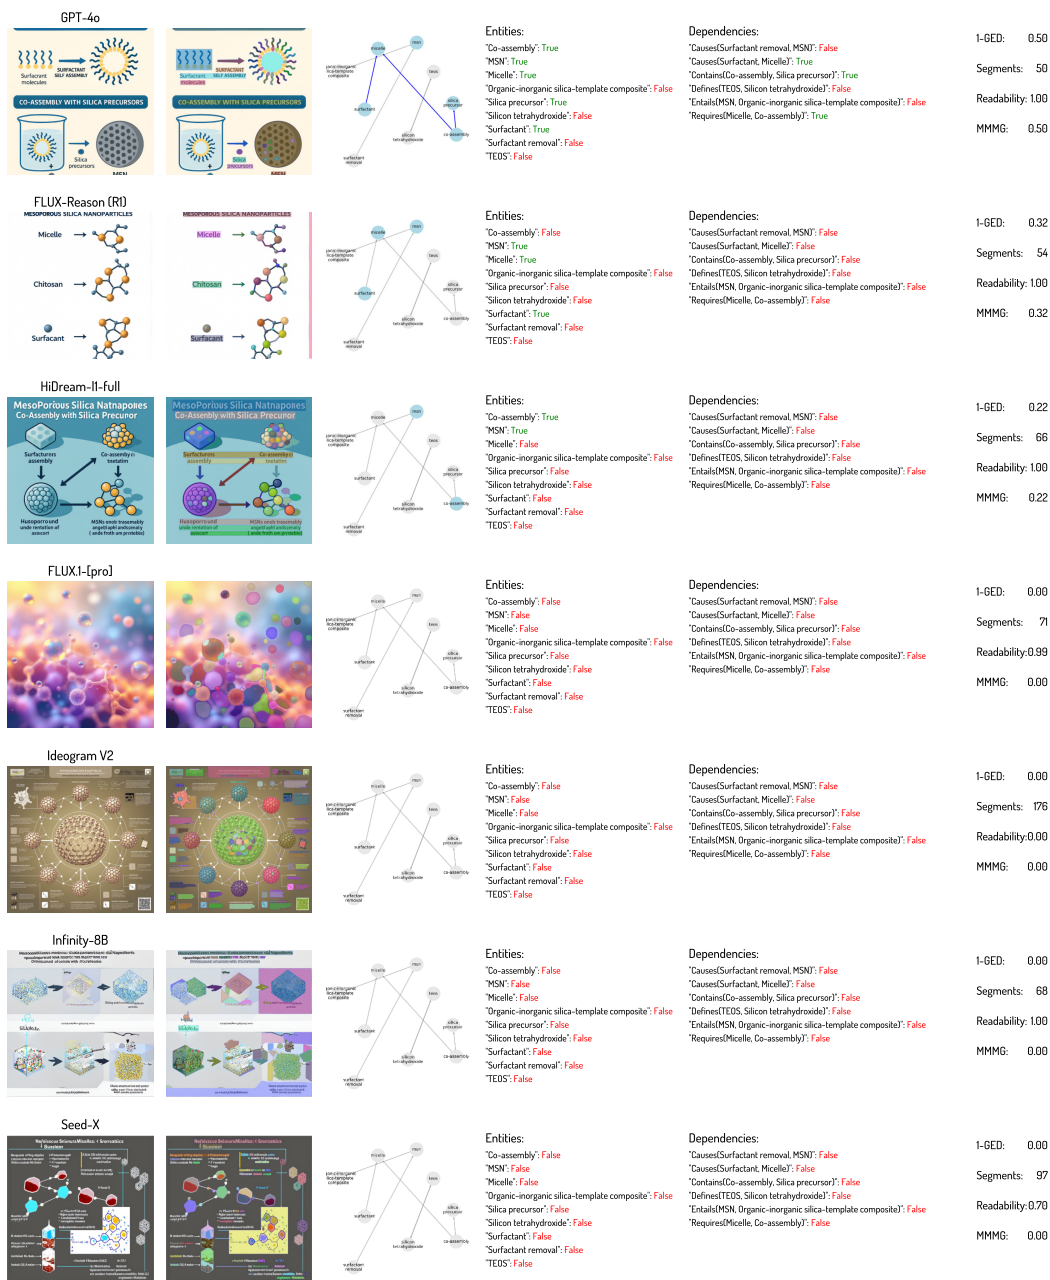

Figure 53: MMMG Benchmark visualization for seven representative models on a PhD-Chemistry example. Each row corresponds to one model and, from left to right, displays the generated image, its segmentation map, the reconstructed knowledge graph, the extracted entity and dependency lists, and finally the overall MMMG-Score along with its component sub-scores.

## F.6.3 Mathematics

Question: Visualize an infographic illustrating the different types of regression and their relationships.

|                                                                                                           |                                                                                     |                                                                                     |                                                                                                                                                                                                                                                                                                                                                                           |                                                                                                                                                                                                                                                                                                                                                                                                                                                                                                                                                |                                                                                    |
|-----------------------------------------------------------------------------------------------------------|-------------------------------------------------------------------------------------|-------------------------------------------------------------------------------------|---------------------------------------------------------------------------------------------------------------------------------------------------------------------------------------------------------------------------------------------------------------------------------------------------------------------------------------------------------------------------|------------------------------------------------------------------------------------------------------------------------------------------------------------------------------------------------------------------------------------------------------------------------------------------------------------------------------------------------------------------------------------------------------------------------------------------------------------------------------------------------------------------------------------------------|------------------------------------------------------------------------------------|
| <p>GPT-4o</p> 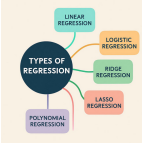           |    |    | <p>Entities:</p> <ul style="list-style-type: none"> <li>'ElasticNet Regression': False</li> <li>'Lasso Regression': True</li> <li>'Linear Regression': True</li> <li>'Logistic Regression': True</li> <li>'Polynomial Regression': True</li> <li>'Regression Types': True</li> <li>'Ridge Regression': True</li> <li>'Stepwise Linear Regression': False</li> </ul>       | <p>Dependencies:</p> <ul style="list-style-type: none"> <li>'Contains(Regression Types, ElasticNet Regression)': False</li> <li>'Contains(Regression Types, Lasso Regression)': True</li> <li>'Contains(Regression Types, Linear Regression)': True</li> <li>'Contains(Regression Types, Logistic Regression)': True</li> <li>'Contains(Regression Types, Polynomial Regression)': True</li> <li>'Contains(Regression Types, Ridge Regression)': True</li> <li>'Contains(Regression Types, Stepwise Linear Regression)': False</li> </ul>      | <p>1-GED: 0.46</p> <p>Segments: 15</p> <p>Readability: 1.00</p> <p>MMMG: 0.46</p>  |
| <p>FLUX-Reason (R1)</p>  |    |    | <p>Entities:</p> <ul style="list-style-type: none"> <li>'ElasticNet Regression': False</li> <li>'Lasso Regression': False</li> <li>'Linear Regression': True</li> <li>'Logistic Regression': False</li> <li>'Polynomial Regression': True</li> <li>'Regression Types': True</li> <li>'Ridge Regression': True</li> <li>'Stepwise Linear Regression': False</li> </ul>     | <p>Dependencies:</p> <ul style="list-style-type: none"> <li>'Contains(Regression Types, ElasticNet Regression)': False</li> <li>'Contains(Regression Types, Lasso Regression)': False</li> <li>'Contains(Regression Types, Linear Regression)': True</li> <li>'Contains(Regression Types, Logistic Regression)': False</li> <li>'Contains(Regression Types, Polynomial Regression)': True</li> <li>'Contains(Regression Types, Ridge Regression)': True</li> <li>'Contains(Regression Types, Stepwise Linear Regression)': False</li> </ul>    | <p>1-GED: 0.36</p> <p>Segments: 6</p> <p>Readability: 1.00</p> <p>MMMG: 0.36</p>   |
| <p>HiDream-II-full</p>   |    |    | <p>Entities:</p> <ul style="list-style-type: none"> <li>'ElasticNet Regression': False</li> <li>'Lasso Regression': False</li> <li>'Linear Regression': False</li> <li>'Logistic Regression': False</li> <li>'Polynomial Regression': False</li> <li>'Regression Types': True</li> <li>'Ridge Regression': True</li> <li>'Stepwise Linear Regression': False</li> </ul>   | <p>Dependencies:</p> <ul style="list-style-type: none"> <li>'Contains(Regression Types, ElasticNet Regression)': False</li> <li>'Contains(Regression Types, Lasso Regression)': False</li> <li>'Contains(Regression Types, Linear Regression)': False</li> <li>'Contains(Regression Types, Logistic Regression)': False</li> <li>'Contains(Regression Types, Polynomial Regression)': False</li> <li>'Contains(Regression Types, Ridge Regression)': True</li> <li>'Contains(Regression Types, Stepwise Linear Regression)': False</li> </ul>  | <p>1-GED: 0.12</p> <p>Segments: 28</p> <p>Readability: 1.00</p> <p>MMMG: 0.12</p>  |
| <p>FLUX1-[pro]</p>      |   |   | <p>Entities:</p> <ul style="list-style-type: none"> <li>'ElasticNet Regression': False</li> <li>'Lasso Regression': False</li> <li>'Linear Regression': False</li> <li>'Logistic Regression': False</li> <li>'Polynomial Regression': False</li> <li>'Regression Types': True</li> <li>'Ridge Regression': False</li> <li>'Stepwise Linear Regression': False</li> </ul>  | <p>Dependencies:</p> <ul style="list-style-type: none"> <li>'Contains(Regression Types, ElasticNet Regression)': False</li> <li>'Contains(Regression Types, Lasso Regression)': False</li> <li>'Contains(Regression Types, Linear Regression)': False</li> <li>'Contains(Regression Types, Logistic Regression)': False</li> <li>'Contains(Regression Types, Polynomial Regression)': False</li> <li>'Contains(Regression Types, Ridge Regression)': False</li> <li>'Contains(Regression Types, Stepwise Linear Regression)': False</li> </ul> | <p>1-GED: 0.12</p> <p>Segments: 33</p> <p>Readability: 1.00</p> <p>MMMG: 0.12</p>  |
| <p>Ideogram V2</p>     |  |  | <p>Entities:</p> <ul style="list-style-type: none"> <li>'ElasticNet Regression': False</li> <li>'Lasso Regression': False</li> <li>'Linear Regression': False</li> <li>'Logistic Regression': False</li> <li>'Polynomial Regression': False</li> <li>'Regression Types': False</li> <li>'Ridge Regression': False</li> <li>'Stepwise Linear Regression': False</li> </ul> | <p>Dependencies:</p> <ul style="list-style-type: none"> <li>'Contains(Regression Types, ElasticNet Regression)': False</li> <li>'Contains(Regression Types, Lasso Regression)': False</li> <li>'Contains(Regression Types, Linear Regression)': False</li> <li>'Contains(Regression Types, Logistic Regression)': False</li> <li>'Contains(Regression Types, Polynomial Regression)': False</li> <li>'Contains(Regression Types, Ridge Regression)': False</li> <li>'Contains(Regression Types, Stepwise Linear Regression)': False</li> </ul> | <p>1-GED: 0.00</p> <p>Segments: 112</p> <p>Readability: 0.53</p> <p>MMMG: 0.00</p> |
| <p>Infinity-8B</p>     |  |  | <p>Entities:</p> <ul style="list-style-type: none"> <li>'ElasticNet Regression': False</li> <li>'Lasso Regression': False</li> <li>'Linear Regression': False</li> <li>'Logistic Regression': False</li> <li>'Polynomial Regression': False</li> <li>'Regression Types': False</li> <li>'Ridge Regression': False</li> <li>'Stepwise Linear Regression': False</li> </ul> | <p>Dependencies:</p> <ul style="list-style-type: none"> <li>'Contains(Regression Types, ElasticNet Regression)': False</li> <li>'Contains(Regression Types, Lasso Regression)': False</li> <li>'Contains(Regression Types, Linear Regression)': False</li> <li>'Contains(Regression Types, Logistic Regression)': False</li> <li>'Contains(Regression Types, Polynomial Regression)': False</li> <li>'Contains(Regression Types, Ridge Regression)': False</li> <li>'Contains(Regression Types, Stepwise Linear Regression)': False</li> </ul> | <p>1-GED: 0.00</p> <p>Segments: 96</p> <p>Readability: 0.71</p> <p>MMMG: 0.00</p>  |
| <p>Seed-X</p>          |  |  | <p>Entities:</p> <ul style="list-style-type: none"> <li>'ElasticNet Regression': False</li> <li>'Lasso Regression': False</li> <li>'Linear Regression': False</li> <li>'Logistic Regression': False</li> <li>'Polynomial Regression': False</li> <li>'Regression Types': False</li> <li>'Ridge Regression': False</li> <li>'Stepwise Linear Regression': False</li> </ul> | <p>Dependencies:</p> <ul style="list-style-type: none"> <li>'Contains(Regression Types, ElasticNet Regression)': False</li> <li>'Contains(Regression Types, Lasso Regression)': False</li> <li>'Contains(Regression Types, Linear Regression)': False</li> <li>'Contains(Regression Types, Logistic Regression)': False</li> <li>'Contains(Regression Types, Polynomial Regression)': False</li> <li>'Contains(Regression Types, Ridge Regression)': False</li> <li>'Contains(Regression Types, Stepwise Linear Regression)': False</li> </ul> | <p>1-GED: 0.00</p> <p>Segments: 87</p> <p>Readability: 0.81</p> <p>MMMG: 0.00</p>  |

Figure 54: MMMG Benchmark visualization for seven representative models on a PhD-Mathematics example. Each row corresponds to one model and, from left to right, displays the generated image, its segmentation map, the reconstructed knowledge graph, the extracted entity and dependency lists, and finally the overall MMMG-Score along with its component sub-scores.

## F.6.4 Engineering

Question: Visualize an infographic depicting the key theories in soil mechanics and their interrelations.

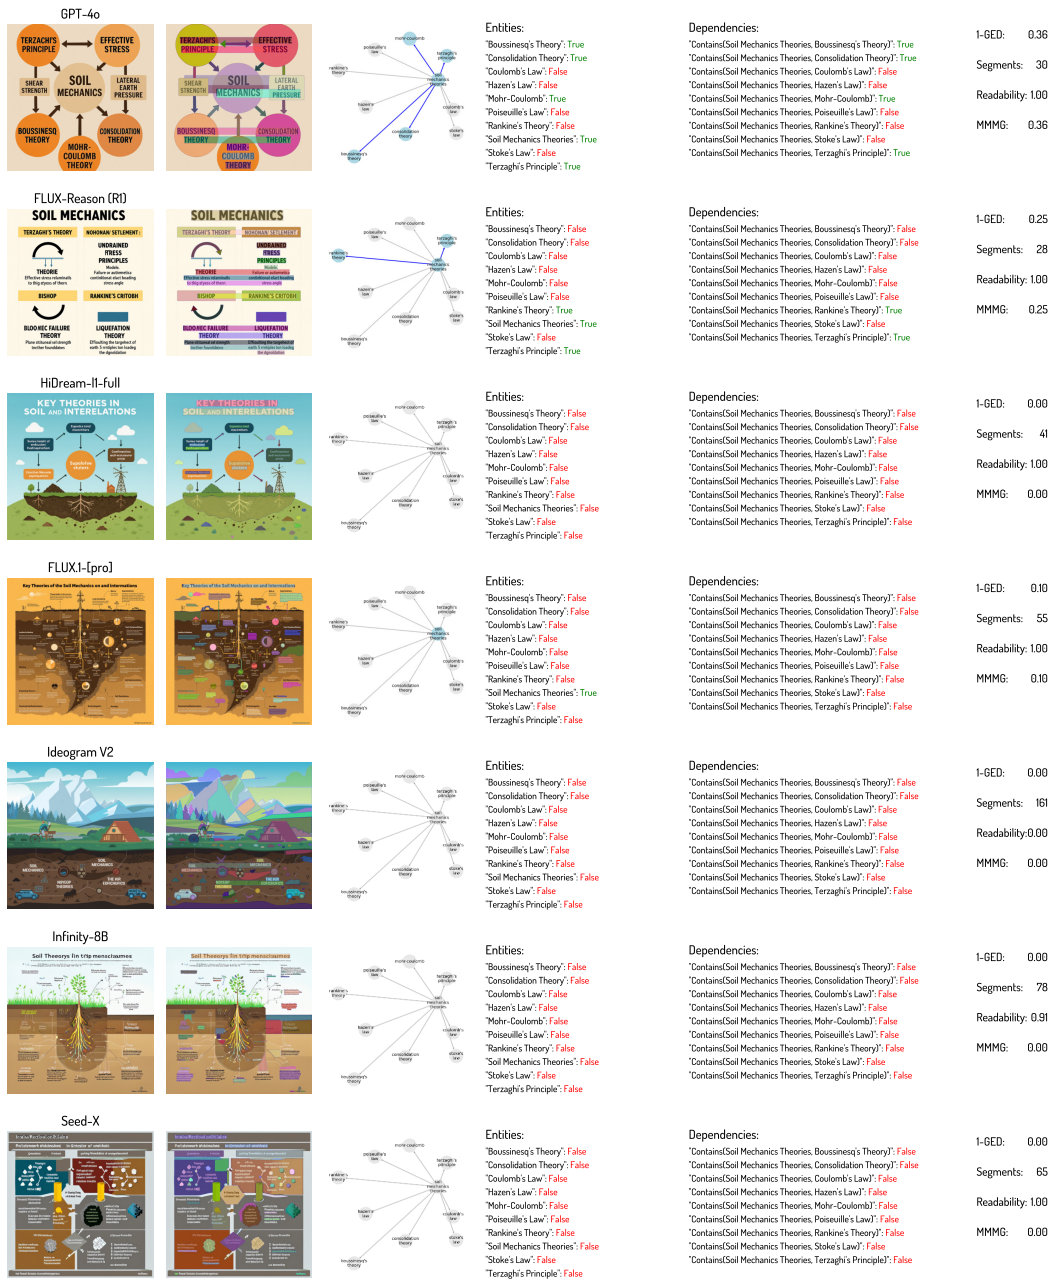

Figure 55: MMMG Benchmark visualization for seven representative models on a PhD-Engineering example. Each row corresponds to one model and, from left to right, displays the generated image, its segmentation map, the reconstructed knowledge graph, the extracted entity and dependency lists, and finally the overall MMMG-Score along with its component sub-scores.

## F.6.5 Geography

Question: Visualize an infographic illustrating the various methods of detecting exoplanets and their comparisons.

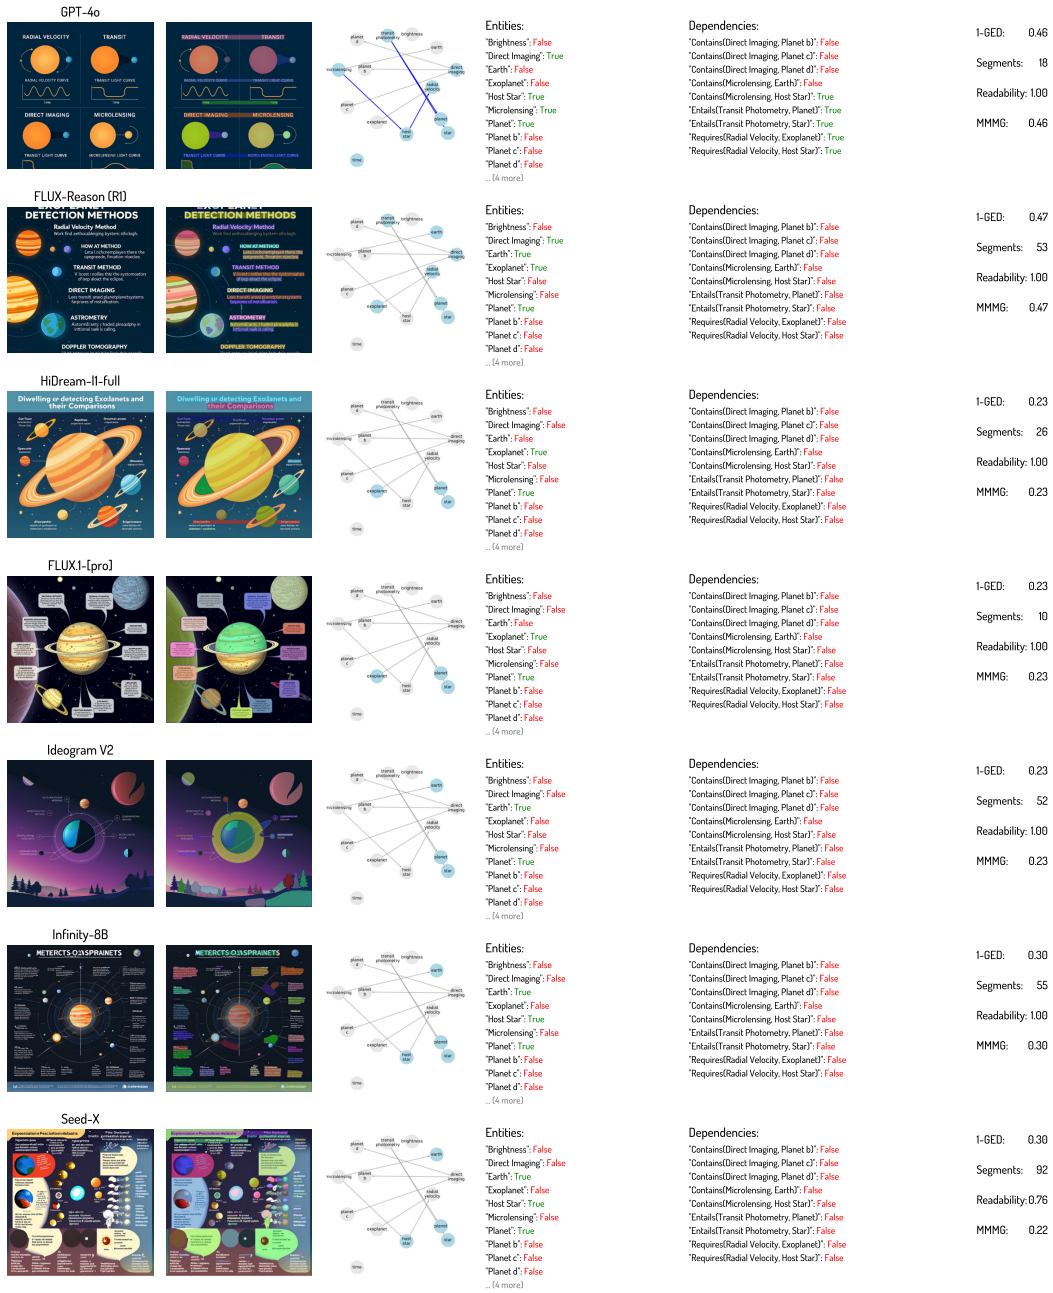

Figure 56: MMMG Benchmark visualization for seven representative models on a PhD-Geography example. Each row corresponds to one model and, from left to right, displays the generated image, its segmentation map, the reconstructed knowledge graph, the extracted entity and dependency lists, and finally the overall MMMG-Score along with its component sub-scores.

## F.6.6 Economics

Question: Visualize an infographic analyzing the effects of a price ceiling on market equilibrium and surpluses.

| Model Name       | Image | Segmentation Map | Reconstructed Knowledge Graph | Entities                                                                                                                                                                                                                                                                                                                                                                                                                    | Dependencies                                                                                                                                                                                                                                                                                                                                                                                                                                                       | 1-GED | Segments | Readability | MMMG |
|------------------|-------|------------------|-------------------------------|-----------------------------------------------------------------------------------------------------------------------------------------------------------------------------------------------------------------------------------------------------------------------------------------------------------------------------------------------------------------------------------------------------------------------------|--------------------------------------------------------------------------------------------------------------------------------------------------------------------------------------------------------------------------------------------------------------------------------------------------------------------------------------------------------------------------------------------------------------------------------------------------------------------|-------|----------|-------------|------|
| GPT-4o           |       |                  |                               | <p>Entities:</p> <ul style="list-style-type: none"> <li>'Consumer surplus': True</li> <li>'Deadweight loss': True</li> <li>'Demand curve': True</li> <li>'Equilibrium quantity': True</li> <li>'Free market equilibrium, Market price at equilibrium': True</li> <li>'Market price at equilibrium': True</li> <li>'Price ceiling': True</li> <li>'Producer surplus': True</li> <li>'Supply curve': True</li> </ul>          | <p>Dependencies:</p> <ul style="list-style-type: none"> <li>'Causes'Price ceiling, Deadweight loss': False</li> <li>'Contains'Demand curve, Consumer surplus': False</li> <li>'Contains'Supply curve, Producer surplus': False</li> <li>'Defines'Free market equilibrium, Market price at equilibrium': True</li> <li>'Entails'Free market equilibrium, Equilibrium quantity': True</li> <li>'Requires'Price ceiling, Free market equilibrium': False</li> </ul>   | 0.86  | 19       | 1.00        | 0.86 |
| FLUX-Reason (R1) |       |                  |                               | <p>Entities:</p> <ul style="list-style-type: none"> <li>'Consumer surplus': False</li> <li>'Deadweight loss': False</li> <li>'Demand curve': True</li> <li>'Equilibrium quantity': False</li> <li>'Free market equilibrium, Market price at equilibrium': False</li> <li>'Market price at equilibrium': False</li> <li>'Price ceiling': True</li> <li>'Producer surplus': False</li> <li>'Supply curve': True</li> </ul>    | <p>Dependencies:</p> <ul style="list-style-type: none"> <li>'Causes'Price ceiling, Deadweight loss': False</li> <li>'Contains'Demand curve, Consumer surplus': False</li> <li>'Contains'Supply curve, Producer surplus': False</li> <li>'Defines'Free market equilibrium, Market price at equilibrium': False</li> <li>'Entails'Free market equilibrium, Equilibrium quantity': False</li> <li>'Requires'Price ceiling, Free market equilibrium': False</li> </ul> | 0.32  | 39       | 1.00        | 0.32 |
| HiDream-11-full  |       |                  |                               | <p>Entities:</p> <ul style="list-style-type: none"> <li>'Consumer surplus': False</li> <li>'Deadweight loss': False</li> <li>'Demand curve': True</li> <li>'Equilibrium quantity': True</li> <li>'Free market equilibrium, Market price at equilibrium': True</li> <li>'Market price at equilibrium': True</li> <li>'Price ceiling': True</li> <li>'Producer surplus': False</li> <li>'Supply curve': True</li> </ul>       | <p>Dependencies:</p> <ul style="list-style-type: none"> <li>'Causes'Price ceiling, Deadweight loss': False</li> <li>'Contains'Demand curve, Consumer surplus': False</li> <li>'Contains'Supply curve, Producer surplus': False</li> <li>'Defines'Free market equilibrium, Market price at equilibrium': True</li> <li>'Entails'Free market equilibrium, Equilibrium quantity': True</li> <li>'Requires'Price ceiling, Free market equilibrium': False</li> </ul>   | 0.48  | 29       | 1.00        | 0.48 |
| FLUX1-[pro]      |       |                  |                               | <p>Entities:</p> <ul style="list-style-type: none"> <li>'Consumer surplus': False</li> <li>'Deadweight loss': False</li> <li>'Demand curve': False</li> <li>'Equilibrium quantity': False</li> <li>'Free market equilibrium, Market price at equilibrium': False</li> <li>'Market price at equilibrium': False</li> <li>'Price ceiling': False</li> <li>'Producer surplus': False</li> <li>'Supply curve': False</li> </ul> | <p>Dependencies:</p> <ul style="list-style-type: none"> <li>'Causes'Price ceiling, Deadweight loss': False</li> <li>'Contains'Demand curve, Consumer surplus': False</li> <li>'Contains'Supply curve, Producer surplus': False</li> <li>'Defines'Free market equilibrium, Market price at equilibrium': False</li> <li>'Entails'Free market equilibrium, Equilibrium quantity': False</li> <li>'Requires'Price ceiling, Free market equilibrium': False</li> </ul> | 0.00  | 56       | 1.00        | 0.00 |
| Ideogram V2      |       |                  |                               | <p>Entities:</p> <ul style="list-style-type: none"> <li>'Consumer surplus': False</li> <li>'Deadweight loss': False</li> <li>'Demand curve': False</li> <li>'Equilibrium quantity': False</li> <li>'Free market equilibrium, Market price at equilibrium': False</li> <li>'Market price at equilibrium': False</li> <li>'Price ceiling': False</li> <li>'Producer surplus': False</li> <li>'Supply curve': False</li> </ul> | <p>Dependencies:</p> <ul style="list-style-type: none"> <li>'Causes'Price ceiling, Deadweight loss': False</li> <li>'Contains'Demand curve, Consumer surplus': False</li> <li>'Contains'Supply curve, Producer surplus': False</li> <li>'Defines'Free market equilibrium, Market price at equilibrium': False</li> <li>'Entails'Free market equilibrium, Equilibrium quantity': False</li> <li>'Requires'Price ceiling, Free market equilibrium': False</li> </ul> | 0.00  | 165      | 0.00        | 0.00 |
| Infinity-BB      |       |                  |                               | <p>Entities:</p> <ul style="list-style-type: none"> <li>'Consumer surplus': False</li> <li>'Deadweight loss': False</li> <li>'Demand curve': True</li> <li>'Equilibrium quantity': True</li> <li>'Free market equilibrium, Market price at equilibrium': False</li> <li>'Market price at equilibrium': False</li> <li>'Price ceiling': True</li> <li>'Producer surplus': False</li> <li>'Supply curve': True</li> </ul>     | <p>Dependencies:</p> <ul style="list-style-type: none"> <li>'Causes'Price ceiling, Deadweight loss': False</li> <li>'Contains'Demand curve, Consumer surplus': False</li> <li>'Contains'Supply curve, Producer surplus': False</li> <li>'Defines'Free market equilibrium, Market price at equilibrium': False</li> <li>'Entails'Free market equilibrium, Equilibrium quantity': False</li> <li>'Requires'Price ceiling, Free market equilibrium': False</li> </ul> | 0.32  | 145      | 0.17        | 0.05 |
| Seed-X           |       |                  |                               | <p>Entities:</p> <ul style="list-style-type: none"> <li>'Consumer surplus': False</li> <li>'Deadweight loss': False</li> <li>'Demand curve': False</li> <li>'Equilibrium quantity': False</li> <li>'Free market equilibrium, Market price at equilibrium': False</li> <li>'Market price at equilibrium': False</li> <li>'Price ceiling': False</li> <li>'Producer surplus': False</li> <li>'Supply curve': False</li> </ul> | <p>Dependencies:</p> <ul style="list-style-type: none"> <li>'Causes'Price ceiling, Deadweight loss': False</li> <li>'Contains'Demand curve, Consumer surplus': False</li> <li>'Contains'Supply curve, Producer surplus': False</li> <li>'Defines'Free market equilibrium, Market price at equilibrium': False</li> <li>'Entails'Free market equilibrium, Equilibrium quantity': False</li> <li>'Requires'Price ceiling, Free market equilibrium': False</li> </ul> | 0.00  | 81       | 0.88        | 0.00 |

Figure 57: MMMG Benchmark visualization for seven representative models on a PhD-Economics example. Each row corresponds to one model and, from left to right, displays the generated image, its segmentation map, the reconstructed knowledge graph, the extracted entity and dependency lists, and finally the overall MMMG-Score along with its component sub-scores.

## F.6.7 Sociology

Question: Visualize the key components and relationships that define an Age Friendly City in an infographic format.

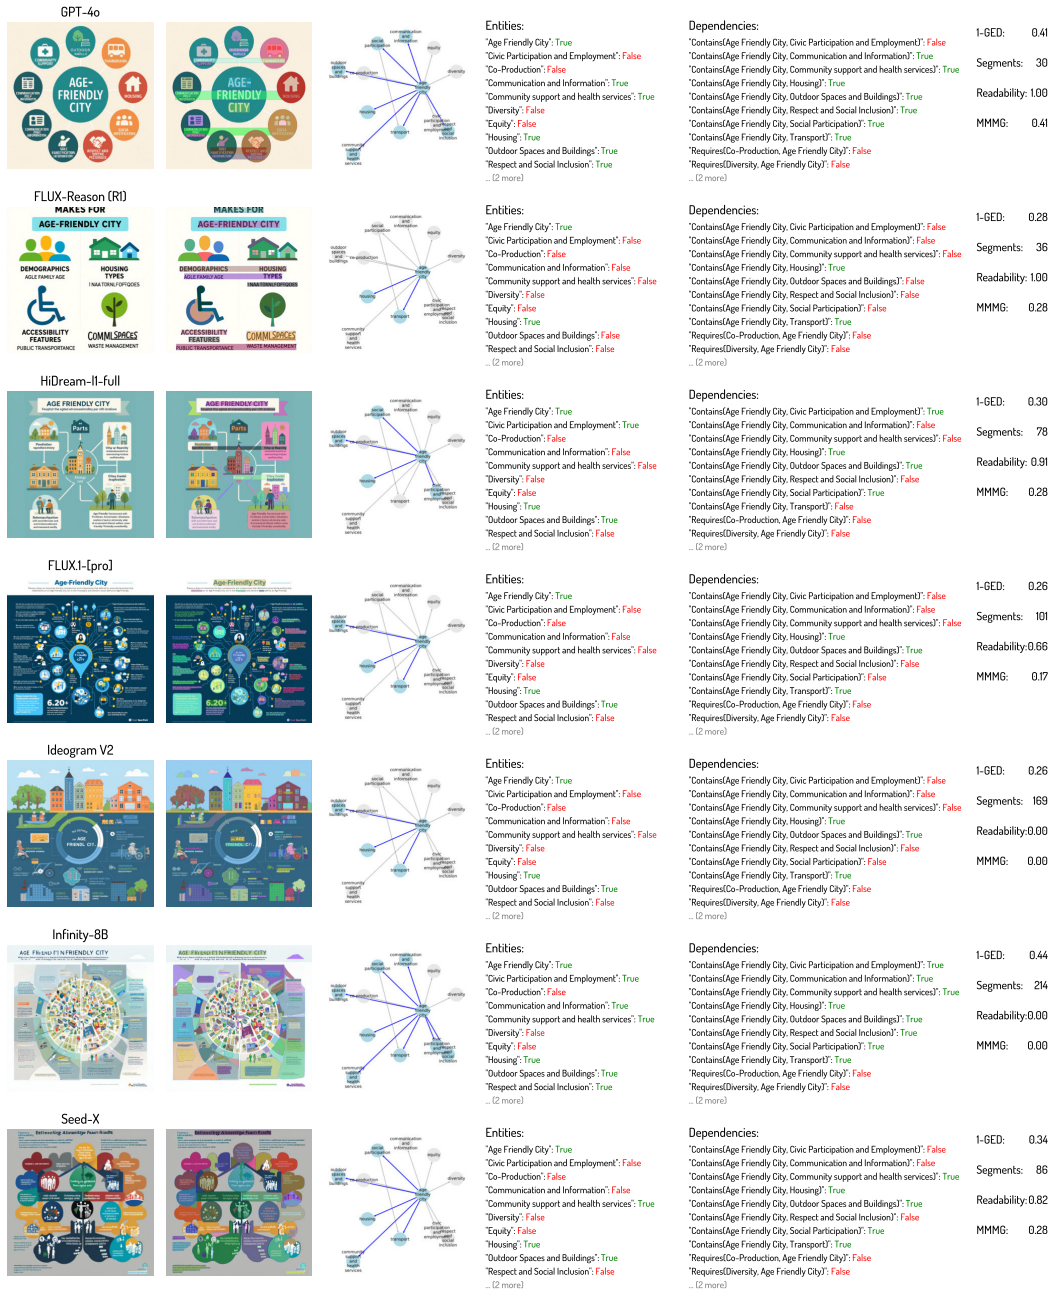

Figure 58: MMMG Benchmark visualization for seven representative models on a PhD-Sociology example. Each row corresponds to one model and, from left to right, displays the generated image, its segmentation map, the reconstructed knowledge graph, the extracted entity and dependency lists, and finally the overall MMMG-Score along with its component sub-scores.

## F.6.8 History

Question: Design a comparative chart of ancient Greek and Roman political systems, focusing on governance, citizenship, and legal frameworks.

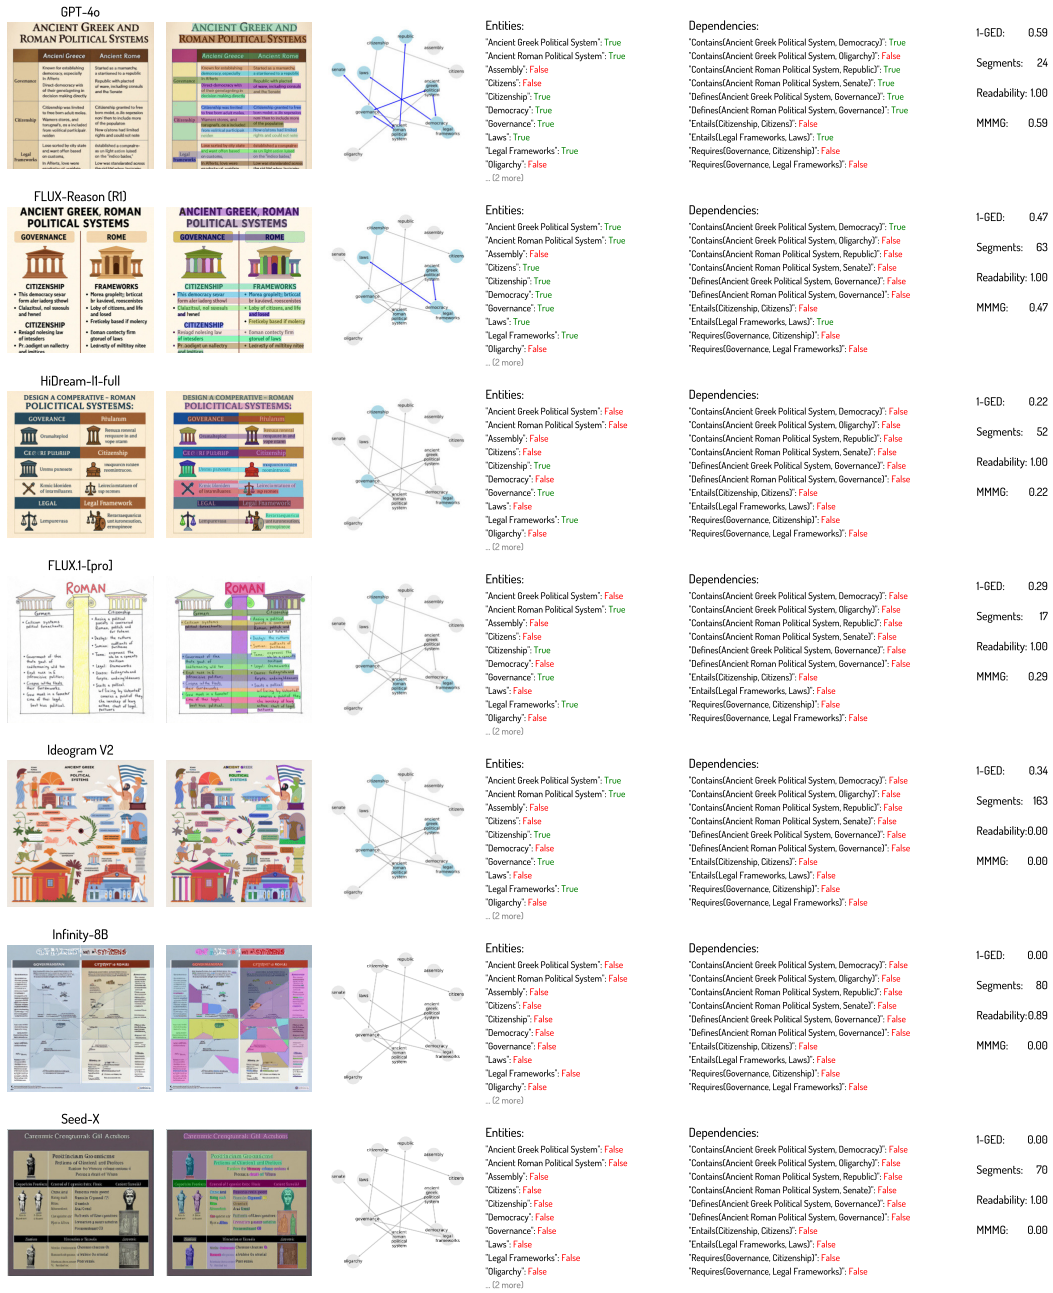

Figure 59: MMMG Benchmark visualization for seven representative models on a PhD-History example. Each row corresponds to one model and, from left to right, displays the generated image, its segmentation map, the reconstructed knowledge graph, the extracted entity and dependency lists, and finally the overall MMMG-Score along with its component sub-scores.

## F.6.9 Philosophy

Question: Visualize a mind map that explores the relationship between philosophy and science, highlighting key debates and figures in the philosophy of science.

| Model            | Generated Image | Segmentation Map | Reconstructed Knowledge Graph | Entities                                                                                                                                                                                                                                                     | Dependencies                                                                                                                                                                                                                                                                                                                                                                                                                                                                    | I-GED       | Segments | Readability | MMMG |
|------------------|-----------------|------------------|-------------------------------|--------------------------------------------------------------------------------------------------------------------------------------------------------------------------------------------------------------------------------------------------------------|---------------------------------------------------------------------------------------------------------------------------------------------------------------------------------------------------------------------------------------------------------------------------------------------------------------------------------------------------------------------------------------------------------------------------------------------------------------------------------|-------------|----------|-------------|------|
| GPT-4o           |                 |                  |                               | Entities:<br>'debates': False<br>'empiricism': True<br>'epistemology': False<br>'falsifiability': False<br>'figures': True<br>'mind map': True<br>'paradigm shift': False<br>'philosophy': True<br>'rationalism': False<br>'science': True<br>... (0 more)   | Dependencies:<br>'Contains(debates, falsifiability)': False<br>'Contains(debates, paradigm shift)': False<br>'Contains(philosophy, epistemology)': False<br>'Contains(philosophy, scientific method)': False<br>'Contains(science, empiricism)': False<br>'Contains(science, rationalism)': False<br>'Entails(philosophy, debates)': False<br>'Entails(science, debates)': False<br>'Requires(debates, figures)': False<br>'Requires(mind map, debates)': False<br>... (3 more) | 1-GED: 0.31 | 19       | 100         | 0.31 |
| FLUX-Reason (R1) |                 |                  |                               | Entities:<br>'debates': False<br>'empiricism': False<br>'epistemology': True<br>'falsifiability': False<br>'figures': True<br>'mind map': True<br>'paradigm shift': False<br>'philosophy': True<br>'rationalism': False<br>'science': True<br>... (0 more)   | Dependencies:<br>'Contains(debates, falsifiability)': False<br>'Contains(debates, paradigm shift)': False<br>'Contains(philosophy, epistemology)': False<br>'Contains(philosophy, scientific method)': False<br>'Contains(science, empiricism)': False<br>'Contains(science, rationalism)': False<br>'Entails(philosophy, debates)': False<br>'Entails(science, debates)': False<br>'Requires(debates, figures)': False<br>'Requires(mind map, debates)': False<br>... (3 more) | 1-GED: 0.34 | 21       | 100         | 0.34 |
| HiDream-11-full  |                 |                  |                               | Entities:<br>'debates': False<br>'empiricism': False<br>'epistemology': False<br>'falsifiability': False<br>'figures': False<br>'mind map': True<br>'paradigm shift': False<br>'philosophy': True<br>'rationalism': False<br>'science': True<br>... (0 more) | Dependencies:<br>'Contains(debates, falsifiability)': False<br>'Contains(debates, paradigm shift)': False<br>'Contains(philosophy, epistemology)': False<br>'Contains(philosophy, scientific method)': False<br>'Contains(science, empiricism)': False<br>'Contains(science, rationalism)': False<br>'Entails(philosophy, debates)': False<br>'Entails(science, debates)': False<br>'Requires(debates, figures)': False<br>'Requires(mind map, debates)': False<br>... (3 more) | 1-GED: 0.34 | 41       | 100         | 0.34 |
| FLUX-1-pro       |                 |                  |                               | Entities:<br>'debates': True<br>'empiricism': False<br>'epistemology': False<br>'falsifiability': False<br>'figures': False<br>'mind map': True<br>'paradigm shift': False<br>'philosophy': True<br>'rationalism': False<br>'science': True<br>... (0 more)  | Dependencies:<br>'Contains(debates, falsifiability)': False<br>'Contains(debates, paradigm shift)': False<br>'Contains(philosophy, epistemology)': False<br>'Contains(philosophy, scientific method)': False<br>'Contains(science, empiricism)': False<br>'Contains(science, rationalism)': False<br>'Entails(philosophy, debates)': False<br>'Entails(science, debates)': False<br>'Requires(debates, figures)': False<br>'Requires(mind map, debates)': True<br>... (3 more)  | 1-GED: 0.26 | 67       | 100         | 0.26 |
| Ideogram V2      |                 |                  |                               | Entities:<br>'debates': True<br>'empiricism': False<br>'epistemology': False<br>'falsifiability': False<br>'figures': True<br>'mind map': True<br>'paradigm shift': False<br>'philosophy': True<br>'rationalism': False<br>'science': True<br>... (0 more)   | Dependencies:<br>'Contains(debates, falsifiability)': False<br>'Contains(debates, paradigm shift)': False<br>'Contains(philosophy, epistemology)': False<br>'Contains(philosophy, scientific method)': False<br>'Contains(science, empiricism)': False<br>'Contains(science, rationalism)': False<br>'Entails(philosophy, debates)': True<br>'Entails(science, debates)': True<br>'Requires(debates, figures)': False<br>'Requires(mind map, debates)': True<br>... (3 more)    | 1-GED: 0.30 | 141      | 0.21        | 0.06 |
| Infinity-BB      |                 |                  |                               | Entities:<br>'debates': False<br>'empiricism': False<br>'epistemology': True<br>'falsifiability': False<br>'figures': False<br>'mind map': True<br>'paradigm shift': False<br>'philosophy': True<br>'rationalism': False<br>'science': True<br>... (0 more)  | Dependencies:<br>'Contains(debates, falsifiability)': False<br>'Contains(debates, paradigm shift)': False<br>'Contains(philosophy, epistemology)': True<br>'Contains(philosophy, scientific method)': False<br>'Contains(science, empiricism)': False<br>'Contains(science, rationalism)': False<br>'Entails(philosophy, debates)': False<br>'Entails(science, debates)': False<br>'Requires(debates, figures)': False<br>'Requires(mind map, debates)': False<br>... (3 more)  | 1-GED: 0.27 | 228      | 0.00        | 0.00 |
| Seed-X           |                 |                  |                               | Entities:<br>'debates': False<br>'empiricism': False<br>'epistemology': False<br>'falsifiability': False<br>'figures': False<br>'mind map': True<br>'paradigm shift': False<br>'philosophy': True<br>'rationalism': False<br>'science': True<br>... (0 more) | Dependencies:<br>'Contains(debates, falsifiability)': False<br>'Contains(debates, paradigm shift)': False<br>'Contains(philosophy, epistemology)': False<br>'Contains(philosophy, scientific method)': False<br>'Contains(science, empiricism)': False<br>'Contains(science, rationalism)': False<br>'Entails(philosophy, debates)': False<br>'Entails(science, debates)': False<br>'Requires(debates, figures)': False<br>'Requires(mind map, debates)': False<br>... (3 more) | 1-GED: 0.08 | 72       | 0.98        | 0.08 |

Figure 60: MMMG Benchmark visualization for seven representative models on a PhD-Philosophy example. Each row corresponds to one model and, from left to right, displays the generated image, its segmentation map, the reconstructed knowledge graph, the extracted entity and dependency lists, and finally the overall MMMG-Score along with its component sub-scores.

## F.6.10 Literature

Question: Create an infographic detailing the use of symbolism in modern literature, featuring examples from key authors.

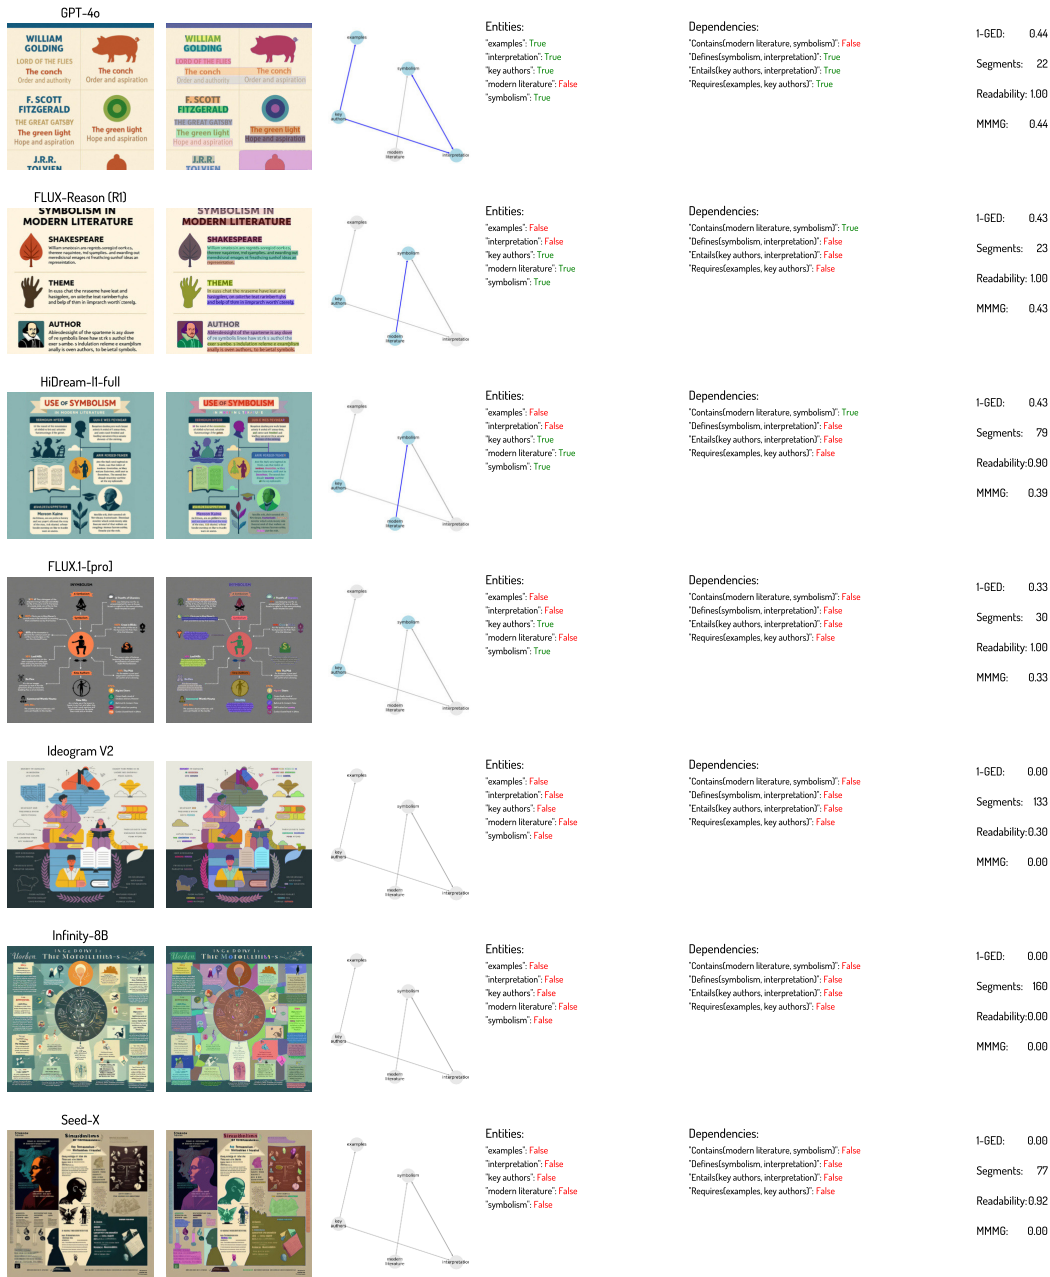

Figure 61: MMMG Benchmark visualization for seven representative models on a PhD-Literature example. Each row corresponds to one model and, from left to right, displays the generated image, its segmentation map, the reconstructed knowledge graph, the extracted entity and dependency lists, and finally the overall MMMG-Score along with its component sub-scores.

## References
